# Supplementary material
Source: Research Square preprint supplement (doi:10.21203/rs.3.rs-9451480/v1)

**Supplementary Figure S1.** Histograms showing the distributions of heterozygosity (%) and missing data (NoCall rate, %) across markers and genotypes before and after quality filtering. Panels (A-D) show marker-level distributions: heterozygosity before filtering (A) and after filtering (B), and NoCall rate before filtering (C) and after filtering (D). Panels (E-H) show genotype-level distributions: heterozygosity before filtering (E) and after filtering (F), and NoCall rate before filtering (G) and after filtering (H). Dotted blue lines indicate the applied filtering threshold of 7%. Filtering removed markers and genotypes exceeding this threshold, thereby improving data quality for downstream analyses.

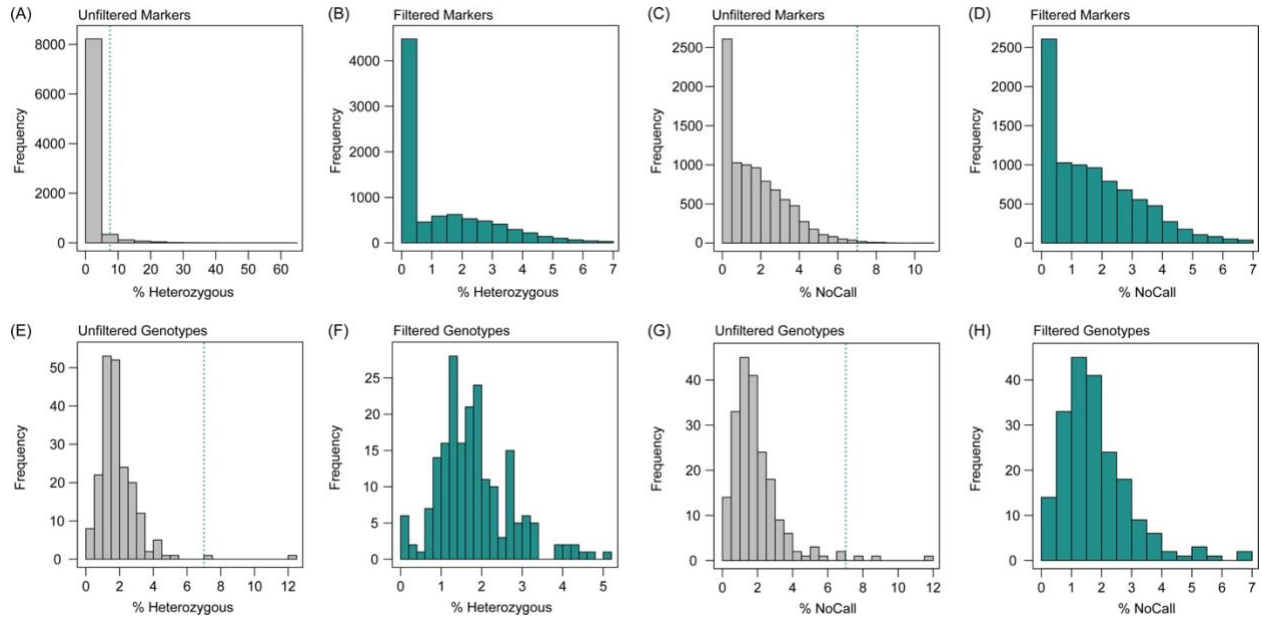

**Supplementary Figure S2.** Principal coordinate analysis (PCoA) of genotype data used to identify potential outlier lines within the nested association mapping (NAM) population. PCoA plots are shown separately for each NAM family: (A) NAM.144, (B) NAM.212, and (C) NAM.233. The corresponding parental lines are labelled.

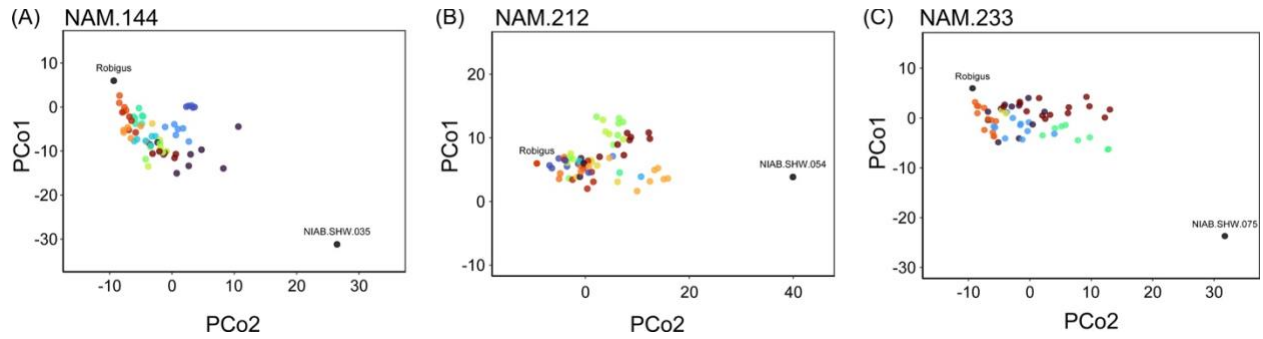

**Supplementary Figure S3.** Linkage disequilibrium (LD) between SNP markers on each chromosome prior to marker repositioning. LD was calculated as pairwise correlation ( $R^2$ ) among 5,327 previously anchored markers within each chromosome.

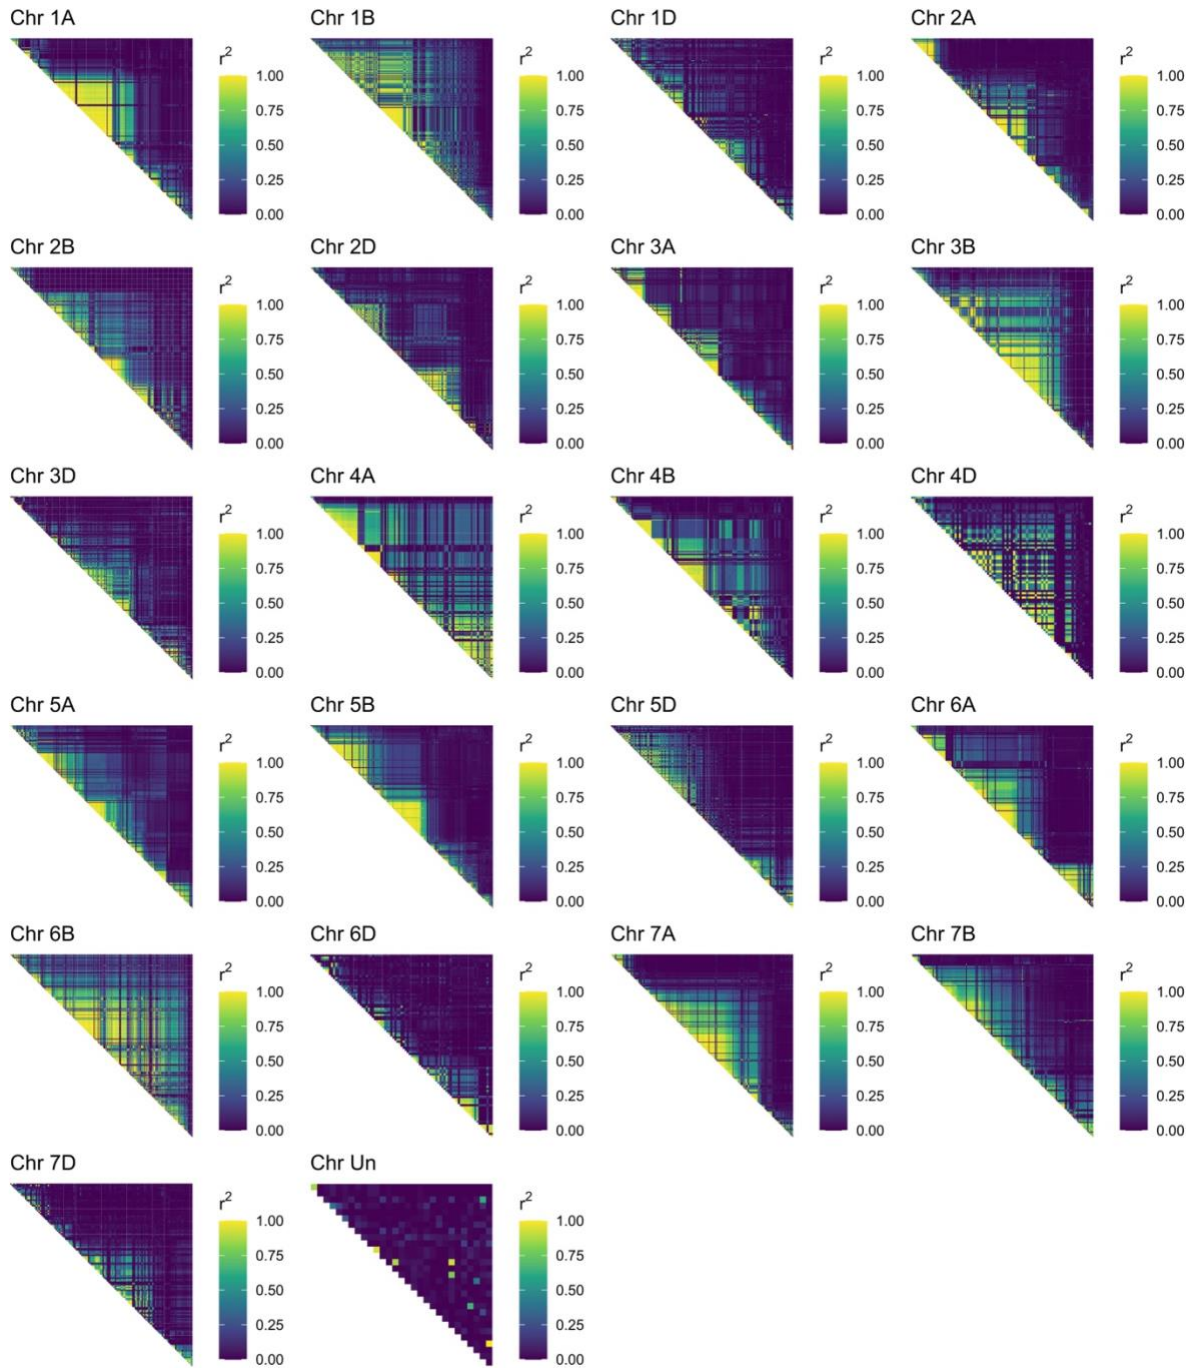

**Supplementary Figure S4.** Linkage disequilibrium (LD) between SNP markers on each chromosome following marker repositioning. LD was calculated as pairwise correlation ( $R^2$ ) among 7,032 anchored markers within each chromosome after repositioning.

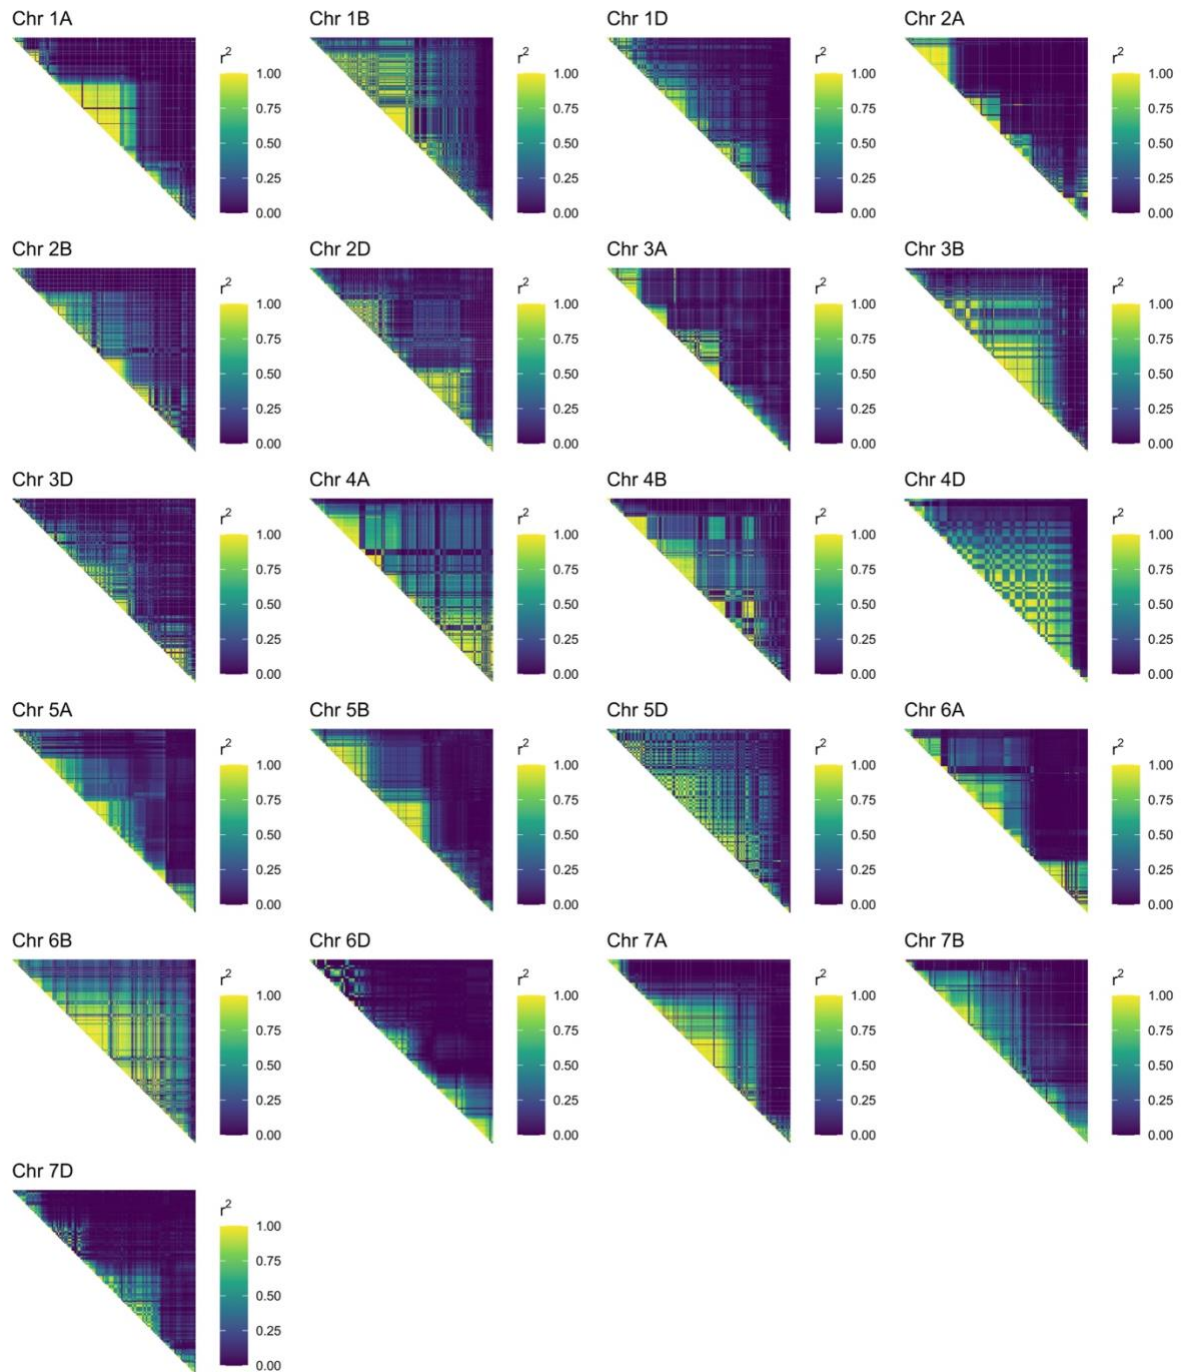

**Supplementary Figure S5.** Model comparison for GWAS of necrosis development (AUDPC\_N\_HT74) using alternative fixed-effect covariates. For all GWAS runs, kinship correction was applied using a marker set thinned by LD-based skimming at  $|r| = 1.0$ . Models were tested with different combinations of fixed covariates: (A) no fixed covariates, (B) family, (C) AABB donor, (D) 10 principal components (10x PC), and (E) family, AABB donor, and 10x PC. For each covariate combination, results are shown as: (i) Manhattan plots, (ii) quantile-quantile (QQ) plots with the corresponding genomic inflation factor ( $\lambda$ ), and (iii) histograms of GWAS  $p$ -value distributions.

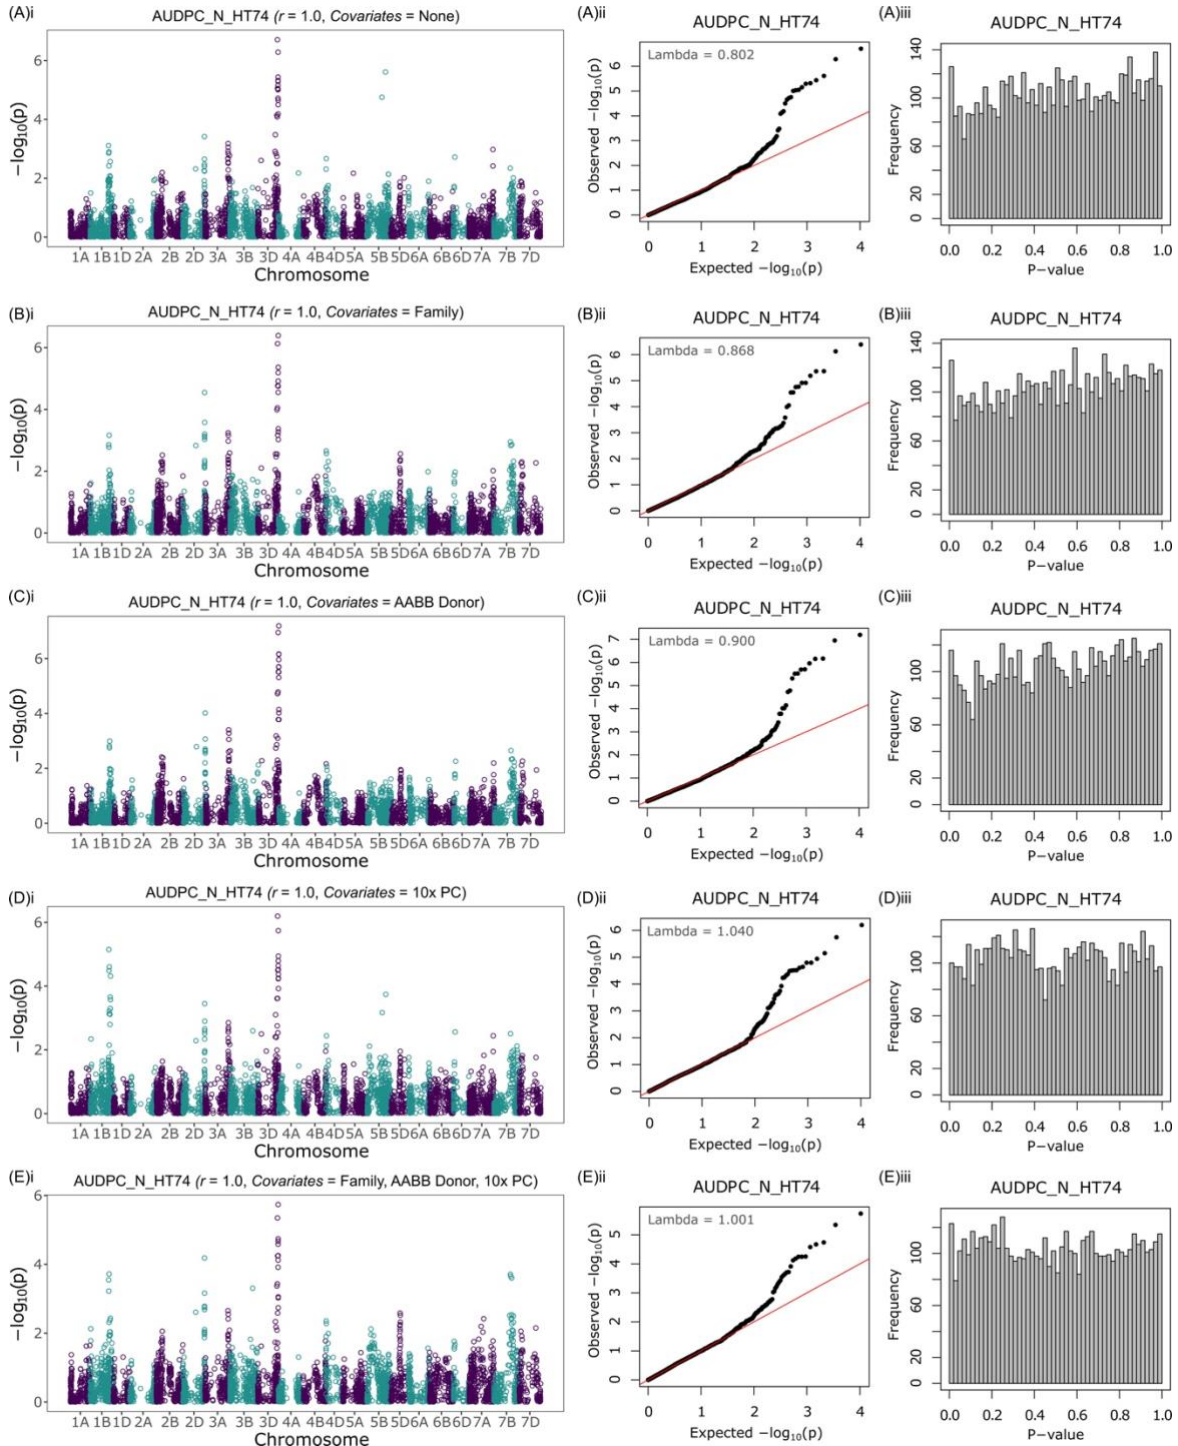

**Supplementary Figure S6.** Number of SNPs differentiating each pair of SHW founders (SHW.035, SHW.054, and SHW.075) across the A, B, and D subgenomes. SNPs were classified as differentiating when the two founders carried different allele calls. Bars show the total number of differentiating SNPs per subgenome for each pairwise comparison.

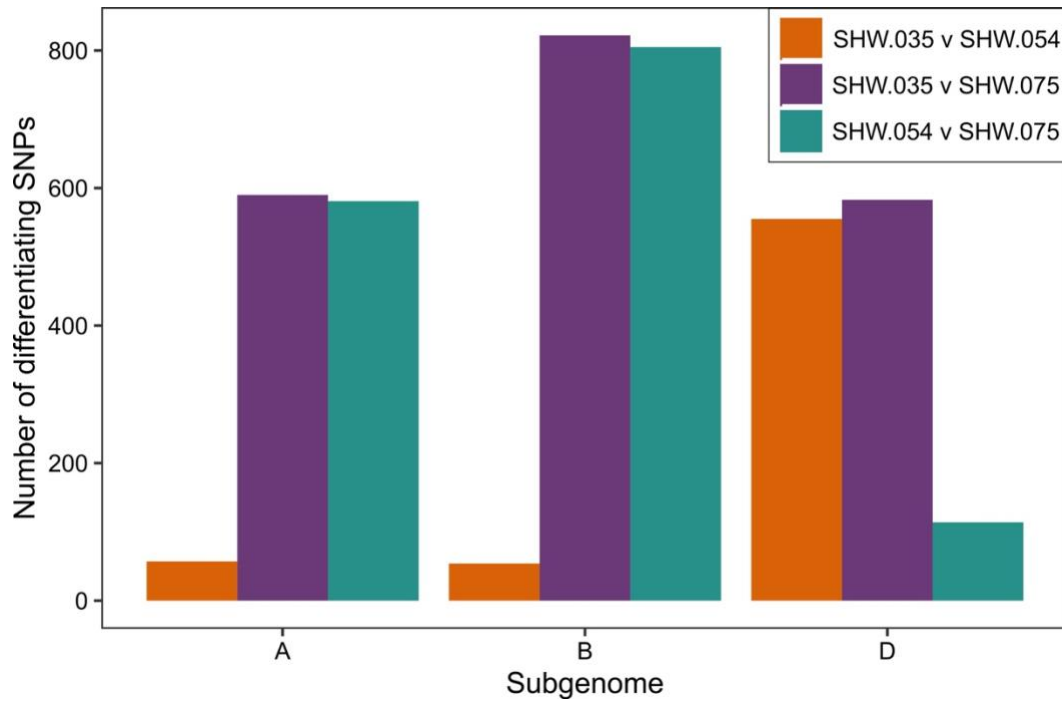

**Supplementary Figure S7.** Pairwise linkage disequilibrium ( $R^2$ ) between SNP markers as a function of physical distance (Mb), used to estimate LD decay. LD declined to a threshold of  $R^2 = 0.2$  at approximately 50 Mb.

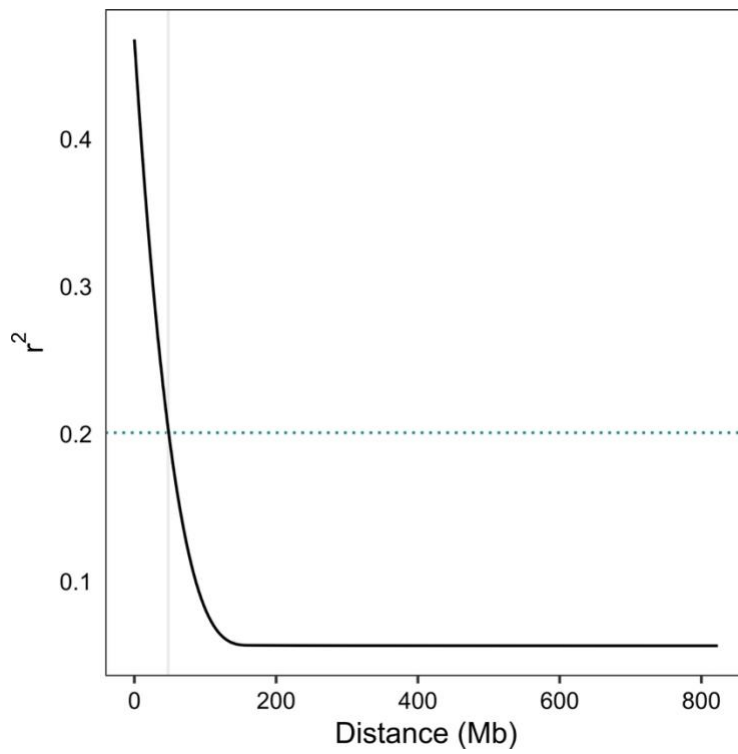

**Supplementary Figure S8.** Genome-wide association mapping for AUDPC\_N across all isolates in the wheat NAM population. Manhattan plots (panels Ai-Ei, left) and the corresponding quantile-quantile (QQ) plots (panels Aii-Eii, right) show the results of genome-wide association studies (GWAS) for area under the disease progress curve for necrosis (AUDPC\_N) in the NAM population following inoculation with five *Z. tritici* isolates: (A) HT-18, (B) HT-44, (C) HT-53, (D) HT-74, and (E) HT-96. The dashed grey horizontal line indicates the genome-wide significance threshold determined by 1,000 permutations at  $\alpha = 0.05$  for each isolate, while the dotted yellow line denotes the false discovery rate (FDR) threshold at  $q = 0.05$ .

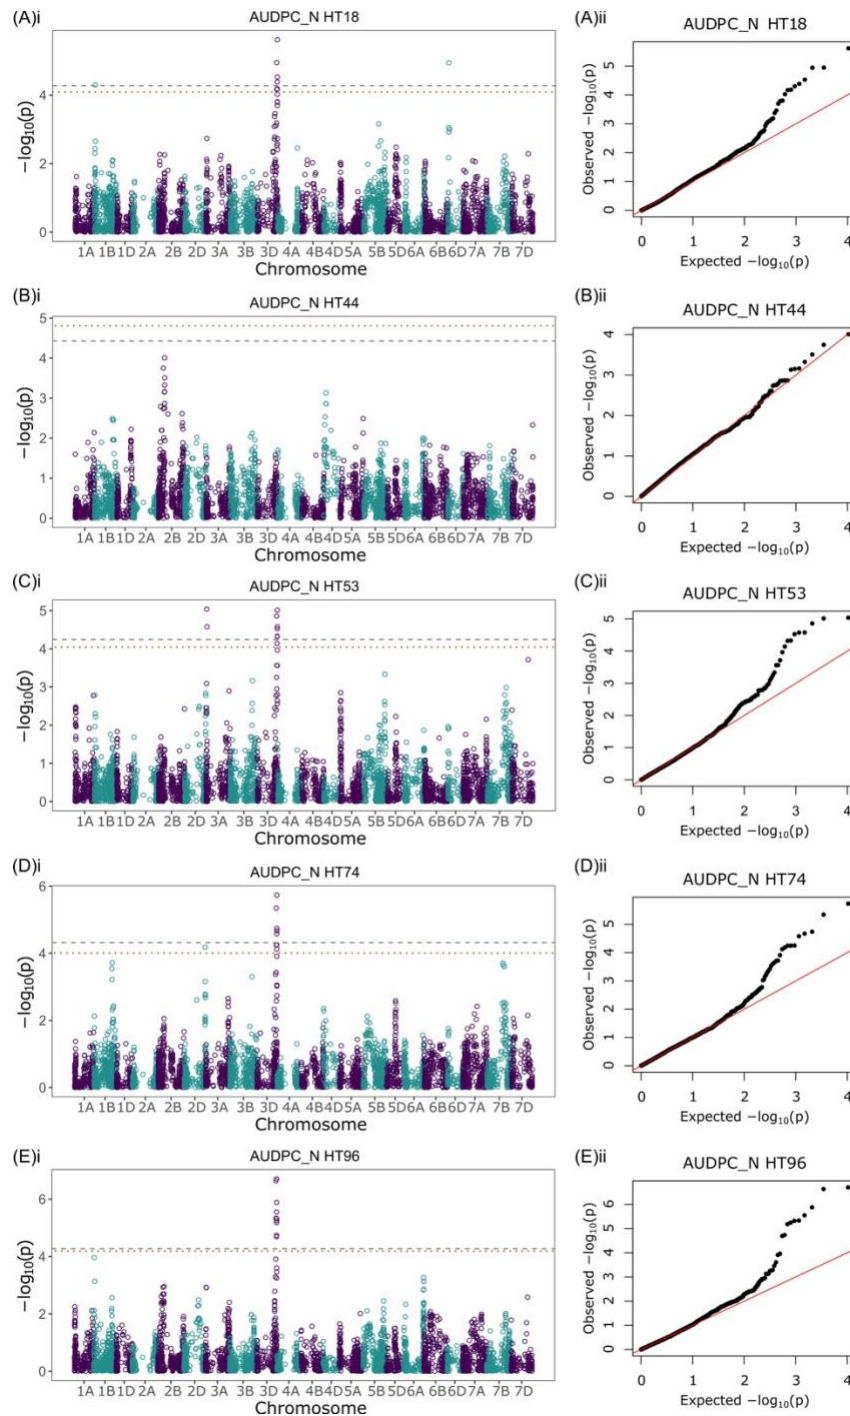

**Supplementary Figure S9.** Genome-wide association mapping for AUDPC\_P across all isolates in the wheat NAM population. Manhattan plots (panels Ai-Ei, left) and the corresponding quantile-quantile (QQ) plots (panels Aii-Eii, right) show the results of genome-wide association studies (GWAS) for area under the disease progress curve for pycnidia (AUDPC\_P) in the NAM population following inoculation with five *Z. tritici* isolates: (A) HT-18, (B) HT-44, (C) HT-53, (D) HT-74, and (E) HT-96. The dashed grey horizontal line indicates the genome-wide significance threshold determined by 1,000 permutations at  $\alpha = 0.05$  for each isolate, while the dotted yellow line denotes the false discovery rate (FDR) threshold at  $q = 0.05$ .

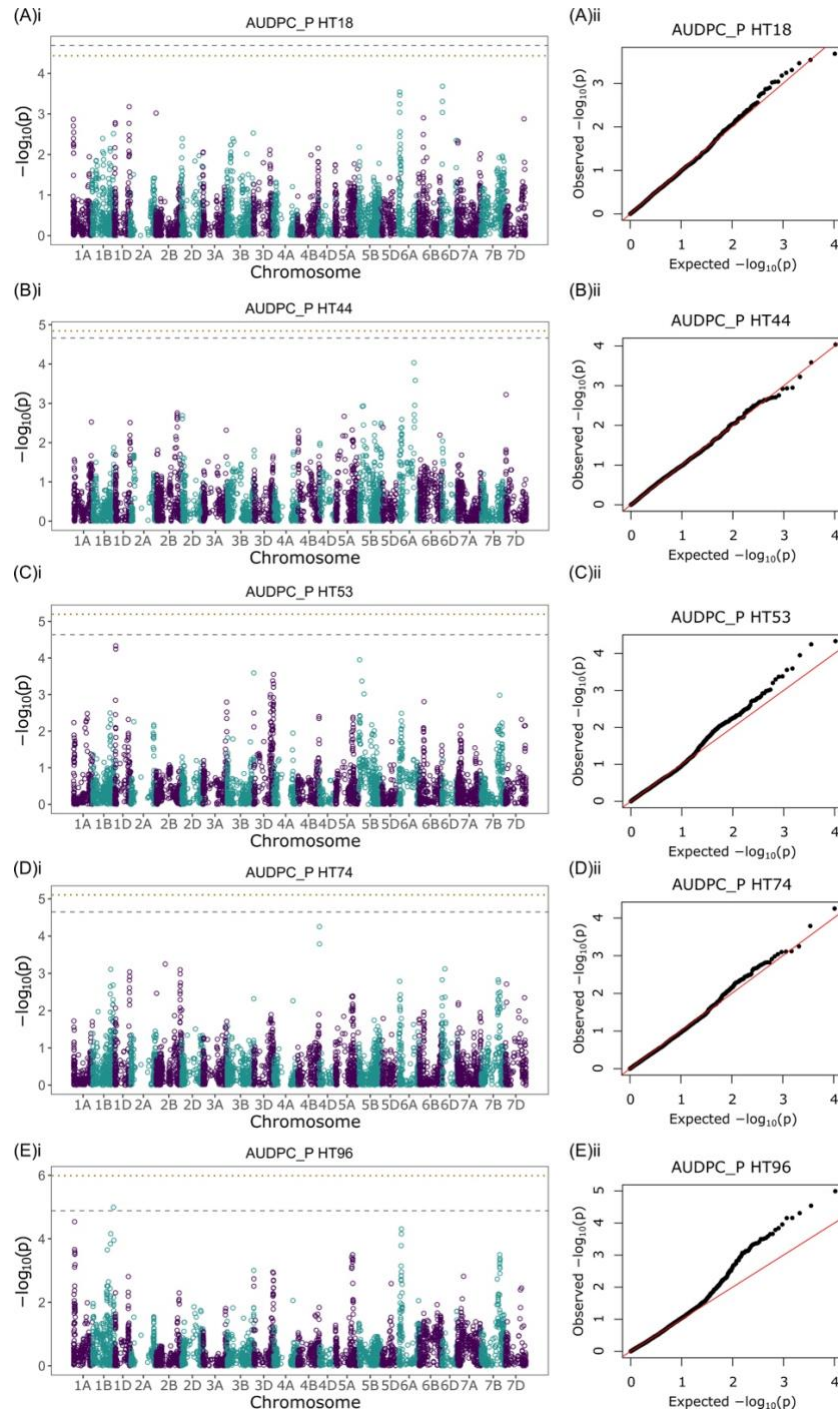

Supplement: Supplementary file 2 [file 97eb89da21a53bd1c562272c.pdf]
