# Supplementary material
Source: Research Square preprint supplement (doi:10.21203/rs.3.rs-9451480/v1)
Supplement: Supplementary file 2 [file ccfb1d96af390531bfc0aab6.xlsx]

## Sheet: Supplementary Table S1
Supplementary Table S1. List of all phenotyped NAM lines, including the synthetic hexaploid wheat (SHW) donor, tetraploid (AABB) donor, D-genome donor, and whether high-quality genotype data were available for each line.
Phenotyped Line	Genotype Available	Family ID	Synthetic Parent	DD Donor	AABB Donor
KWS Cashel	N	n/a	n/a	n/a	n/a
Robigus	Y	n/a	n/a	n/a	n/a
SHW.035	Y	n/a	n/a	WX224	Biensur
SHW.054	Y	n/a	n/a	Ent.392	Biensur
SHW.075	Y	n/a	n/a	Ent.404	Hoh-501
SHW.BC.144.10.1.1.1	Y	NAM.144	NIAB.SHW.035	WX224	Biensur
SHW.BC.144.10.1.2.1	Y	NAM.144	NIAB.SHW.035	WX224	Biensur
SHW.BC.144.10.1.3.1	Y	NAM.144	NIAB.SHW.035	WX224	Biensur
SHW.BC.144.10.1.4.1	Y	NAM.144	NIAB.SHW.035	WX224	Biensur
SHW.BC.144.10.1.6.1	Y	NAM.144	NIAB.SHW.035	WX224	Biensur
SHW.BC.144.10.1.7.1	Y	NAM.144	NIAB.SHW.035	WX224	Biensur
SHW.BC.144.10.1.8.1	N	NAM.144	NIAB.SHW.035	WX224	Biensur
SHW.BC.144.11.1.1.1	Y	NAM.144	NIAB.SHW.035	WX224	Biensur
SHW.BC.144.11.1.2.1	Y	NAM.144	NIAB.SHW.035	WX224	Biensur
SHW.BC.144.11.1.3.1	Y	NAM.144	NIAB.SHW.035	WX224	Biensur
SHW.BC.144.11.1.7.1	Y	NAM.144	NIAB.SHW.035	WX224	Biensur
SHW.BC.144.11.1.8.1	Y	NAM.144	NIAB.SHW.035	WX224	Biensur
SHW.BC.144.12.1.1.1	Y	NAM.144	NIAB.SHW.035	WX224	Biensur
SHW.BC.144.12.1.2.1	Y	NAM.144	NIAB.SHW.035	WX224	Biensur
SHW.BC.144.12.1.3.1	Y	NAM.144	NIAB.SHW.035	WX224	Biensur
SHW.BC.144.12.1.4.1	Y	NAM.144	NIAB.SHW.035	WX224	Biensur
SHW.BC.144.12.1.5.1	Y	NAM.144	NIAB.SHW.035	WX224	Biensur
SHW.BC.144.12.1.8.1	Y	NAM.144	NIAB.SHW.035	WX224	Biensur
SHW.BC.144.14.1.1.1	Y	NAM.144	NIAB.SHW.035	WX224	Biensur
SHW.BC.144.14.1.3.1	Y	NAM.144	NIAB.SHW.035	WX224	Biensur
SHW.BC.144.14.1.5.1	Y	NAM.144	NIAB.SHW.035	WX224	Biensur
SHW.BC.144.14.1.6.1	Y	NAM.144	NIAB.SHW.035	WX224	Biensur
SHW.BC.144.14.1.7.1	Y	NAM.144	NIAB.SHW.035	WX224	Biensur
SHW.BC.144.14.1.8.1	Y	NAM.144	NIAB.SHW.035	WX224	Biensur
SHW.BC.144.15.1.1.1	Y	NAM.144	NIAB.SHW.035	WX224	Biensur
SHW.BC.144.15.1.3.1	Y	NAM.144	NIAB.SHW.035	WX224	Biensur
SHW.BC.144.15.1.4.1	Y	NAM.144	NIAB.SHW.035	WX224	Biensur
SHW.BC.144.15.1.5.1	Y	NAM.144	NIAB.SHW.035	WX224	Biensur
SHW.BC.144.15.1.6.1	Y	NAM.144	NIAB.SHW.035	WX224	Biensur
SHW.BC.144.15.1.7.1	Y	NAM.144	NIAB.SHW.035	WX224	Biensur
SHW.BC.144.15.1.8.1	Y	NAM.144	NIAB.SHW.035	WX224	Biensur
SHW.BC.144.16.1.2.1	Y	NAM.144	NIAB.SHW.035	WX224	Biensur
SHW.BC.144.2.1.1.1	Y	NAM.144	NIAB.SHW.035	WX224	Biensur
SHW.BC.144.2.1.2.1	Y	NAM.144	NIAB.SHW.035	WX224	Biensur
SHW.BC.144.2.1.3.1	N	NAM.144	NIAB.SHW.035	WX224	Biensur
SHW.BC.144.2.1.4.1	Y	NAM.144	NIAB.SHW.035	WX224	Biensur
SHW.BC.144.2.1.5.1	Y	NAM.144	NIAB.SHW.035	WX224	Biensur
SHW.BC.144.2.1.6.1	Y	NAM.144	NIAB.SHW.035	WX224	Biensur
SHW.BC.144.2.1.7.1	Y	NAM.144	NIAB.SHW.035	WX224	Biensur
SHW.BC.144.4.1.4.1	Y	NAM.144	NIAB.SHW.035	WX224	Biensur
SHW.BC.144.5.1.1.1	Y	NAM.144	NIAB.SHW.035	WX224	Biensur
SHW.BC.144.5.1.2.1	Y	NAM.144	NIAB.SHW.035	WX224	Biensur
SHW.BC.144.5.1.3.1	Y	NAM.144	NIAB.SHW.035	WX224	Biensur
SHW.BC.144.5.1.4.1	Y	NAM.144	NIAB.SHW.035	WX224	Biensur
SHW.BC.144.5.1.6.1	N	NAM.144	NIAB.SHW.035	WX224	Biensur
SHW.BC.144.5.1.7.1	Y	NAM.144	NIAB.SHW.035	WX224	Biensur
SHW.BC.144.5.1.8.1	Y	NAM.144	NIAB.SHW.035	WX224	Biensur
SHW.BC.144.6.1.1.1	Y	NAM.144	NIAB.SHW.035	WX224	Biensur
SHW.BC.144.6.1.2.1	Y	NAM.144	NIAB.SHW.035	WX224	Biensur
SHW.BC.144.6.1.3.1	Y	NAM.144	NIAB.SHW.035	WX224	Biensur
SHW.BC.144.6.1.4.1	Y	NAM.144	NIAB.SHW.035	WX224	Biensur
SHW.BC.144.6.1.6.1	N	NAM.144	NIAB.SHW.035	WX224	Biensur
SHW.BC.144.6.1.8.1	Y	NAM.144	NIAB.SHW.035	WX224	Biensur
SHW.BC.144.8.1.1.1	Y	NAM.144	NIAB.SHW.035	WX224	Biensur
SHW.BC.144.8.1.2.1	Y	NAM.144	NIAB.SHW.035	WX224	Biensur
SHW.BC.144.8.1.3.1	Y	NAM.144	NIAB.SHW.035	WX224	Biensur
SHW.BC.144.8.1.4.1	Y	NAM.144	NIAB.SHW.035	WX224	Biensur
SHW.BC.144.8.1.8.1	Y	NAM.144	NIAB.SHW.035	WX224	Biensur
SHW.BC.144.9.1.2.1	Y	NAM.144	NIAB.SHW.035	WX224	Biensur
SHW.BC.144.9.1.3.1	Y	NAM.144	NIAB.SHW.035	WX224	Biensur
SHW.BC.144.9.1.4.1	Y	NAM.144	NIAB.SHW.035	WX224	Biensur
SHW.BC.144.9.1.5.1	Y	NAM.144	NIAB.SHW.035	WX224	Biensur
SHW.BC.144.9.1.6.1	Y	NAM.144	NIAB.SHW.035	WX224	Biensur
SHW.BC.144.9.1.7.1	Y	NAM.144	NIAB.SHW.035	WX224	Biensur
SHW.BC.144.9.1.8.1	Y	NAM.144	NIAB.SHW.035	WX224	Biensur
SHW.BC.212.1.2.1.1	Y	NAM.212	NIAB.SHW.054	Ent.392	Biensur
SHW.BC.212.1.2.2.1	Y	NAM.212	NIAB.SHW.054	Ent.392	Biensur
SHW.BC.212.1.3.1.1	Y	NAM.212	NIAB.SHW.054	Ent.392	Biensur
SHW.BC.212.1.3.2.1	Y	NAM.212	NIAB.SHW.054	Ent.392	Biensur
SHW.BC.212.1.5.1.1	Y	NAM.212	NIAB.SHW.054	Ent.392	Biensur
SHW.BC.212.1.5.2.1	Y	NAM.212	NIAB.SHW.054	Ent.392	Biensur
SHW.BC.212.1.6.1.1	Y	NAM.212	NIAB.SHW.054	Ent.392	Biensur
SHW.BC.212.1.6.2.1	Y	NAM.212	NIAB.SHW.054	Ent.392	Biensur
SHW.BC.212.1.7.1.1	Y	NAM.212	NIAB.SHW.054	Ent.392	Biensur
SHW.BC.212.1.7.2.1	N	NAM.212	NIAB.SHW.054	Ent.392	Biensur
SHW.BC.212.1.8.1.1	Y	NAM.212	NIAB.SHW.054	Ent.392	Biensur
SHW.BC.212.1.8.2.1	Y	NAM.212	NIAB.SHW.054	Ent.392	Biensur
SHW.BC.212.10.2.1.1	Y	NAM.212	NIAB.SHW.054	Ent.392	Biensur
SHW.BC.212.10.2.2.1	Y	NAM.212	NIAB.SHW.054	Ent.392	Biensur
SHW.BC.212.10.3.1.1	Y	NAM.212	NIAB.SHW.054	Ent.392	Biensur
SHW.BC.212.10.4.1.1	Y	NAM.212	NIAB.SHW.054	Ent.392	Biensur
SHW.BC.212.10.4.2.1	Y	NAM.212	NIAB.SHW.054	Ent.392	Biensur
SHW.BC.212.10.5.2.1	Y	NAM.212	NIAB.SHW.054	Ent.392	Biensur
SHW.BC.212.10.7.1.1	Y	NAM.212	NIAB.SHW.054	Ent.392	Biensur
SHW.BC.212.10.8.2.1	Y	NAM.212	NIAB.SHW.054	Ent.392	Biensur
SHW.BC.212.11.2.1.1	Y	NAM.212	NIAB.SHW.054	Ent.392	Biensur
SHW.BC.212.11.3.1.1	Y	NAM.212	NIAB.SHW.054	Ent.392	Biensur
SHW.BC.212.11.3.2.1	Y	NAM.212	NIAB.SHW.054	Ent.392	Biensur
SHW.BC.212.11.4.1.1	Y	NAM.212	NIAB.SHW.054	Ent.392	Biensur
SHW.BC.212.11.4.2.1	Y	NAM.212	NIAB.SHW.054	Ent.392	Biensur
SHW.BC.212.11.5.1.1	Y	NAM.212	NIAB.SHW.054	Ent.392	Biensur
SHW.BC.212.11.5.2.1	Y	NAM.212	NIAB.SHW.054	Ent.392	Biensur
SHW.BC.212.12.8.1.1	Y	NAM.212	NIAB.SHW.054	Ent.392	Biensur
SHW.BC.212.12.8.2.1	Y	NAM.212	NIAB.SHW.054	Ent.392	Biensur
SHW.BC.212.2.2.1.1	Y	NAM.212	NIAB.SHW.054	Ent.392	Biensur
SHW.BC.212.2.2.2.1	Y	NAM.212	NIAB.SHW.054	Ent.392	Biensur
SHW.BC.212.2.4.1.1	Y	NAM.212	NIAB.SHW.054	Ent.392	Biensur
SHW.BC.212.2.4.2.1	Y	NAM.212	NIAB.SHW.054	Ent.392	Biensur
SHW.BC.212.2.5.1.1	Y	NAM.212	NIAB.SHW.054	Ent.392	Biensur
SHW.BC.212.2.6.1.1	Y	NAM.212	NIAB.SHW.054	Ent.392	Biensur
SHW.BC.212.2.6.2.1	Y	NAM.212	NIAB.SHW.054	Ent.392	Biensur
SHW.BC.212.2.7.2.1	Y	NAM.212	NIAB.SHW.054	Ent.392	Biensur
SHW.BC.212.2.8.1.1	Y	NAM.212	NIAB.SHW.054	Ent.392	Biensur
SHW.BC.212.3.2.1.1	Y	NAM.212	NIAB.SHW.054	Ent.392	Biensur
SHW.BC.212.3.2.2.1	Y	NAM.212	NIAB.SHW.054	Ent.392	Biensur
SHW.BC.212.3.3.1.1	Y	NAM.212	NIAB.SHW.054	Ent.392	Biensur
SHW.BC.212.3.3.2.1	Y	NAM.212	NIAB.SHW.054	Ent.392	Biensur
SHW.BC.212.3.5.1.1	Y	NAM.212	NIAB.SHW.054	Ent.392	Biensur
SHW.BC.212.3.5.2.1	Y	NAM.212	NIAB.SHW.054	Ent.392	Biensur
SHW.BC.212.3.6.1.1	Y	NAM.212	NIAB.SHW.054	Ent.392	Biensur
SHW.BC.212.3.6.2.1	Y	NAM.212	NIAB.SHW.054	Ent.392	Biensur
SHW.BC.212.3.7.1.1	Y	NAM.212	NIAB.SHW.054	Ent.392	Biensur
SHW.BC.212.3.8.1.1	Y	NAM.212	NIAB.SHW.054	Ent.392	Biensur
SHW.BC.212.3.8.2.1	Y	NAM.212	NIAB.SHW.054	Ent.392	Biensur
SHW.BC.233.1.1.1.1	Y	NAM.233	NIAB.SHW.075	Ent.404	Hoh-501
SHW.BC.233.1.3.1.1	Y	NAM.233	NIAB.SHW.075	Ent.404	Hoh-501
SHW.BC.233.1.4.1.1	Y	NAM.233	NIAB.SHW.075	Ent.404	Hoh-501
SHW.BC.233.1.5.1.1	Y	NAM.233	NIAB.SHW.075	Ent.404	Hoh-501
SHW.BC.233.10.2.1.1	Y	NAM.233	NIAB.SHW.075	Ent.404	Hoh-501
SHW.BC.233.10.3.1.1	Y	NAM.233	NIAB.SHW.075	Ent.404	Hoh-501
SHW.BC.233.10.4.1.1	Y	NAM.233	NIAB.SHW.075	Ent.404	Hoh-501
SHW.BC.233.10.6.1.1	Y	NAM.233	NIAB.SHW.075	Ent.404	Hoh-501
SHW.BC.233.10.7.1.1	Y	NAM.233	NIAB.SHW.075	Ent.404	Hoh-501
SHW.BC.233.10.8.1.1	Y	NAM.233	NIAB.SHW.075	Ent.404	Hoh-501
SHW.BC.233.11.1.1.1	Y	NAM.233	NIAB.SHW.075	Ent.404	Hoh-501
SHW.BC.233.12.1.1.1	Y	NAM.233	NIAB.SHW.075	Ent.404	Hoh-501
SHW.BC.233.14.1.1.1	Y	NAM.233	NIAB.SHW.075	Ent.404	Hoh-501
SHW.BC.233.15.1.1.1	Y	NAM.233	NIAB.SHW.075	Ent.404	Hoh-501
SHW.BC.233.2.1.1.1	Y	NAM.233	NIAB.SHW.075	Ent.404	Hoh-501
SHW.BC.233.2.2.1.1	Y	NAM.233	NIAB.SHW.075	Ent.404	Hoh-501
SHW.BC.233.2.3.1.1	Y	NAM.233	NIAB.SHW.075	Ent.404	Hoh-501
SHW.BC.233.2.4.1.1	Y	NAM.233	NIAB.SHW.075	Ent.404	Hoh-501
SHW.BC.233.2.5.1.1	Y	NAM.233	NIAB.SHW.075	Ent.404	Hoh-501
SHW.BC.233.2.6.1.1	Y	NAM.233	NIAB.SHW.075	Ent.404	Hoh-501
SHW.BC.233.2.7.1.1	Y	NAM.233	NIAB.SHW.075	Ent.404	Hoh-501
SHW.BC.233.2.8.1.1	Y	NAM.233	NIAB.SHW.075	Ent.404	Hoh-501
SHW.BC.233.3.2.1.1	Y	NAM.233	NIAB.SHW.075	Ent.404	Hoh-501
SHW.BC.233.3.4.1.1	Y	NAM.233	NIAB.SHW.075	Ent.404	Hoh-501
SHW.BC.233.3.5.1.1	Y	NAM.233	NIAB.SHW.075	Ent.404	Hoh-501
SHW.BC.233.3.6.1.1	Y	NAM.233	NIAB.SHW.075	Ent.404	Hoh-501
SHW.BC.233.3.7.1.1	Y	NAM.233	NIAB.SHW.075	Ent.404	Hoh-501
SHW.BC.233.3.8.1.1	Y	NAM.233	NIAB.SHW.075	Ent.404	Hoh-501
SHW.BC.233.4.1.1.1	Y	NAM.233	NIAB.SHW.075	Ent.404	Hoh-501
SHW.BC.233.4.2.1.1	Y	NAM.233	NIAB.SHW.075	Ent.404	Hoh-501
SHW.BC.233.4.3.1.1	N	NAM.233	NIAB.SHW.075	Ent.404	Hoh-501
SHW.BC.233.4.5.1.1	Y	NAM.233	NIAB.SHW.075	Ent.404	Hoh-501
SHW.BC.233.4.6.1.1	Y	NAM.233	NIAB.SHW.075	Ent.404	Hoh-501
SHW.BC.233.4.8.1.1	Y	NAM.233	NIAB.SHW.075	Ent.404	Hoh-501
SHW.BC.233.5.1.1.1	Y	NAM.233	NIAB.SHW.075	Ent.404	Hoh-501
SHW.BC.233.5.2.1.1	Y	NAM.233	NIAB.SHW.075	Ent.404	Hoh-501
SHW.BC.233.5.3.1.1	Y	NAM.233	NIAB.SHW.075	Ent.404	Hoh-501
SHW.BC.233.5.4.1.1	Y	NAM.233	NIAB.SHW.075	Ent.404	Hoh-501
SHW.BC.233.5.5.1.1	Y	NAM.233	NIAB.SHW.075	Ent.404	Hoh-501
SHW.BC.233.5.6.1.1	Y	NAM.233	NIAB.SHW.075	Ent.404	Hoh-501
SHW.BC.233.5.7.1.1	Y	NAM.233	NIAB.SHW.075	Ent.404	Hoh-501
SHW.BC.233.5.8.1.1	Y	NAM.233	NIAB.SHW.075	Ent.404	Hoh-501
SHW.BC.233.6.3.1.1	Y	NAM.233	NIAB.SHW.075	Ent.404	Hoh-501
SHW.BC.233.6.4.1.1	Y	NAM.233	NIAB.SHW.075	Ent.404	Hoh-501
SHW.BC.233.6.5.1.1	Y	NAM.233	NIAB.SHW.075	Ent.404	Hoh-501
SHW.BC.233.6.6.1.1	Y	NAM.233	NIAB.SHW.075	Ent.404	Hoh-501
SHW.BC.233.6.7.1.1	Y	NAM.233	NIAB.SHW.075	Ent.404	Hoh-501
SHW.BC.233.6.8.1.1	Y	NAM.233	NIAB.SHW.075	Ent.404	Hoh-501
SHW.BC.233.7.1.1.1	Y	NAM.233	NIAB.SHW.075	Ent.404	Hoh-501
SHW.BC.233.7.2.1.1	N	NAM.233	NIAB.SHW.075	Ent.404	Hoh-501
SHW.BC.233.7.7.1.1	N	NAM.233	NIAB.SHW.075	Ent.404	Hoh-501
SHW.BC.233.8.2.1.1	Y	NAM.233	NIAB.SHW.075	Ent.404	Hoh-501
SHW.BC.233.8.3.1.1	Y	NAM.233	NIAB.SHW.075	Ent.404	Hoh-501
SHW.BC.233.8.4.1.1	Y	NAM.233	NIAB.SHW.075	Ent.404	Hoh-501
SHW.BC.233.8.5.1.1	N	NAM.233	NIAB.SHW.075	Ent.404	Hoh-501
SHW.BC.233.8.6.1.1	Y	NAM.233	NIAB.SHW.075	Ent.404	Hoh-501
SHW.BC.233.8.7.1.1	Y	NAM.233	NIAB.SHW.075	Ent.404	Hoh-501
SHW.BC.233.8.8.1.1	Y	NAM.233	NIAB.SHW.075	Ent.404	Hoh-501
SHW.BC.233.9.1.1.1	Y	NAM.233	NIAB.SHW.075	Ent.404	Hoh-501
SHW.BC.233.9.2.1.1	Y	NAM.233	NIAB.SHW.075	Ent.404	Hoh-501
SHW.BC.233.9.3.1.1	Y	NAM.233	NIAB.SHW.075	Ent.404	Hoh-501
SHW.BC.233.9.4.1.1	Y	NAM.233	NIAB.SHW.075	Ent.404	Hoh-501
SHW.BC.233.9.5.1.1	Y	NAM.233	NIAB.SHW.075	Ent.404	Hoh-501
SHW.BC.233.9.6.1.1	Y	NAM.233	NIAB.SHW.075	Ent.404	Hoh-501
SHW.BC.233.9.7.1.1	Y	NAM.233	NIAB.SHW.075	Ent.404	Hoh-501
SHW.BC.233.9.8.1.1	Y	NAM.233	NIAB.SHW.075	Ent.404	Hoh-501

## Sheet: Supplementary Table S2
Supplementary Table S2. Physical map positions of 5,201 SNP markers retained for analysis after removal of markers showing perfect correlation (absolute Pearson’s r = 1).
Marker	Chromosome	Position (nt)
AX-94385756	1A	584682869
AX-94388123	1A	230134341
AX-94388778	1A	582708402
AX-94388999	1A	21036065
AX-94391642	1A	426888911
AX-94393003	1A	60735708
AX-94393159	1A	558195129
AX-94395032	1A	544055175
AX-94399186	1A	350395975
AX-94399869	1A	272316170
AX-94400275	1A	387811952
AX-94400371	1A	298646355
AX-94401483	1A	549695863
AX-94403617	1A	577461705
AX-94405126	1A	350006811
AX-94405726	1A	6154950
AX-94410550	1A	480595380
AX-94412593	1A	298115833
AX-94414832	1A	534565965
AX-94415384	1A	305004176
AX-94416469	1A	546325993
AX-94416982	1A	47578129
AX-94417411	1A	394445115
AX-94418426	1A	311806352
AX-94421251	1A	342878832
AX-94421583	1A	13354219
AX-94421922	1A	578922936
AX-94425021	1A	577461578
AX-94425953	1A	535315011
AX-94428433	1A	41710286
AX-94430594	1A	579198978
AX-94430904	1A	21282316
AX-94431963	1A	213903042
AX-94432777	1A	462435214
AX-94442809	1A	503376300
AX-94443081	1A	77063468
AX-94443744	1A	20094316
AX-94445887	1A	36773419
AX-94446043	1A	26969276
AX-94449293	1A	507079282
AX-94451045	1A	434639076
AX-94452312	1A	255487912
AX-94456767	1A	462435377
AX-94458658	1A	157829918
AX-94460543	1A	119496869
AX-94460676	1A	533450111
AX-94464122	1A	301897816
AX-94465677	1A	544054280
AX-94467726	1A	544055323
AX-94471435	1A	28361126
AX-94473981	1A	534279050
AX-94474833	1A	590004498
AX-94476549	1A	517412024
AX-94476963	1A	218529266
AX-94477156	1A	12497532
AX-94480929	1A	260835882
AX-94483924	1A	544605146
AX-94489106	1A	504414215
AX-94489119	1A	395206710
AX-94489656	1A	279837911
AX-94490519	1A	255754453
AX-94491525	1A	549671064
AX-94491754	1A	11729712
AX-94492795	1A	54015177
AX-94493329	1A	239101985
AX-94493792	1A	14253673
AX-94494685	1A	104937423
AX-94495040	1A	549619420
AX-94502624	1A	534271688
AX-94503076	1A	474192439
AX-94503555	1A	16389875
AX-94506140	1A	291915862
AX-94507420	1A	482335848
AX-94507814	1A	28361089
AX-94507844	1A	544378391
AX-94514773	1A	238653598
AX-94515468	1A	534201557
AX-94517494	1A	230156871
AX-94519347	1A	351882595
AX-94520045	1A	232345657
AX-94521615	1A	165172609
AX-94526630	1A	42550087
AX-94532387	1A	9589005
AX-94534394	1A	436423039
AX-94538776	1A	22756092
AX-94546321	1A	341962861
AX-94552630	1A	535434880
AX-94556635	1A	33375691
AX-94561436	1A	547215707
AX-94564281	1A	257573473
AX-94566415	1A	301857698
AX-94568090	1A	13667357
AX-94581406	1A	276322736
AX-94585817	1A	279830705
AX-94586921	1A	514887990
AX-94597364	1A	485002336
AX-94605082	1A	540337278
AX-94605845	1A	581828997
AX-94607056	1A	15438341
AX-94615199	1A	21624343
AX-94616748	1A	535418438
AX-94617286	1A	8162612
AX-94627776	1A	30193344
AX-94630858	1A	92567918
AX-94634262	1A	551598642
AX-94644914	1A	577986194
AX-94645762	1A	39407460
AX-94648151	1A	288871008
AX-94651412	1A	154014905
AX-94665409	1A	313739027
AX-94668903	1A	165173483
AX-94673150	1A	101380403
AX-94679841	1A	9749158
AX-94682405	1A	14144274
AX-94690269	1A	541631079
AX-94691648	1A	21096633
AX-94695356	1A	175173940
AX-94704464	1A	308347989
AX-94709162	1A	544367564
AX-94710260	1A	22045397
AX-94711993	1A	570155564
AX-94714980	1A	155133793
AX-94716299	1A	117808277
AX-94718117	1A	514890050
AX-94719212	1A	343408813
AX-94729071	1A	549842874
AX-94732625	1A	540051956
AX-94733833	1A	590758417
AX-94735921	1A	541981154
AX-94736642	1A	549666450
AX-94737395	1A	107108315
AX-94739433	1A	49526809
AX-94742397	1A	430600493
AX-94760371	1A	533733075
AX-94761052	1A	32893932
AX-94762508	1A	3256268
AX-94766336	1A	9357652
AX-94769734	1A	9754616
AX-94769778	1A	284912480
AX-94773962	1A	497507755
AX-94774305	1A	532765006
AX-94775321	1A	533699659
AX-94782613	1A	257558157
AX-94783290	1A	22615304
AX-94793862	1A	12369432
AX-94796020	1A	491135231
AX-94800178	1A	579864780
AX-94802893	1A	492807667
AX-94805094	1A	544376692
AX-94811887	1A	9980928
AX-94813794	1A	107108117
AX-94816253	1A	504243660
AX-94817368	1A	425260495
AX-94826210	1A	30197285
AX-94826839	1A	513624126
AX-94837068	1A	582749114
AX-94837705	1A	10055562
AX-94838124	1A	341016294
AX-94840099	1A	19893853
AX-94841333	1A	302905624
AX-94841522	1A	472169030
AX-94845461	1A	135970175
AX-94849540	1A	49097441
AX-94863732	1A	577841231
AX-94865142	1A	582746018
AX-94865782	1A	356474568
AX-94873875	1A	308813857
AX-94874424	1A	548494570
AX-94877635	1A	18820856
AX-94889305	1A	480755283
AX-94890395	1A	299106550
AX-94892480	1A	585626291
AX-94916468	1A	50929886
AX-94917012	1A	25543322
AX-94929127	1A	473415850
AX-94930538	1A	533467232
AX-94943073	1A	11730046
AX-94943789	1A	481655155
AX-94949405	1A	230159528
AX-94950558	1A	9204480
AX-94964398	1A	545475005
AX-94967337	1A	563183509
AX-94972237	1A	532816179
AX-94973540	1A	135968946
AX-94976542	1A	9642761
AX-94977486	1A	7692023
AX-94978091	1A	32893506
AX-94979270	1A	4053566
AX-94983068	1A	308813558
AX-94985209	1A	535027925
AX-94987165	1A	506854586
AX-94992551	1A	572020396
AX-94994228	1A	27361089
AX-94995317	1A	29191415
AX-94995442	1A	587810296
AX-94996750	1A	7651693
AX-94997258	1A	485355341
AX-95004055	1A	506854428
AX-95006353	1A	487311547
AX-95008362	1A	3256363
AX-95013723	1A	300840596
AX-95071361	1A	508925607
AX-95072103	1A	28620424
AX-95077803	1A	569947743
AX-95080736	1A	53897975
AX-95082131	1A	3847127
AX-95083535	1A	505524402
AX-95083541	1A	473011803
AX-95085405	1A	22288657
AX-95099834	1A	223996242
AX-95105199	1A	306112162
AX-95134433	1A	461048323
AX-95137931	1A	576778490
AX-95138946	1A	574338182
AX-95139778	1A	544391456
AX-95146857	1A	536939118
AX-95149925	1A	86237957
AX-95154988	1A	14253976
AX-95159805	1A	515553934
AX-95163067	1A	108774281
AX-95163773	1A	41710496
AX-95170516	1A	587360579
AX-95172478	1A	33022222
AX-95172759	1A	480604446
AX-95174049	1A	582842690
AX-95176482	1A	394478402
AX-95177046	1A	236720470
AX-95179118	1A	508925284
AX-95181262	1A	21096696
AX-95187202	1A	24944708
AX-95187439	1A	108760708
AX-95188865	1A	480755631
AX-95200932	1A	301197484
AX-95202637	1A	100293004
AX-95203056	1A	6915493
AX-95204965	1A	566688989
AX-95205762	1A	552844351
AX-95207798	1A	482279061
AX-95225890	1A	482761826
AX-95226312	1A	233921831
AX-95227941	1A	251018540
AX-95229003	1A	16236116
AX-95230167	1A	5028362
AX-95230513	1A	36569443
AX-95235178	1A	499807792
AX-95237406	1A	42668076
AX-95239997	1A	9642399
AX-95242117	1A	125109097
AX-95242244	1A	558090131
AX-95243556	1A	580424851
AX-95255804	1A	572350913
AX-95259891	1A	12369428
AX-95629264	1A	485357401
AX-95629375	1A	568012818
AX-95629584	1A	301776719
AX-95629860	1A	270007796
AX-95630456	1A	281657026
AX-95630483	1A	343681264
AX-95630534	1A	505270201
AX-95630536	1A	591147317
AX-95631185	1A	49153543
AX-95631320	1A	513661860
AX-95631864	1A	545891327
AX-95632782	1A	516373227
AX-95652208	1A	118507822
AX-95652265	1A	547298620
AX-95652739	1A	7643152
AX-95652758	1A	533445272
AX-95652964	1A	544170135
AX-95653947	1A	540051162
AX-95657284	1A	535434598
AX-95683952	1A	540051810
AX-94381448	1B	582092655
AX-94384089	1B	671999002
AX-94389614	1B	383796346
AX-94390406	1B	430168568
AX-94392749	1B	511211828
AX-94395353	1B	549456914
AX-94395727	1B	629486776
AX-94396214	1B	292341939
AX-94396544	1B	424177461
AX-94396871	1B	554137239
AX-94400901	1B	13044174
AX-94401058	1B	637623159
AX-94401616	1B	631228587
AX-94403383	1B	492864691
AX-94407122	1B	557943819
AX-94408295	1B	520926006
AX-94408453	1B	588627965
AX-94409481	1B	106896424
AX-94414919	1B	196462209
AX-94416667	1B	15099993
AX-94425009	1B	41091751
AX-94426066	1B	330206533
AX-94427201	1B	328942636
AX-94431388	1B	676813408
AX-94431524	1B	90699582
AX-94437408	1B	109728422
AX-94439319	1B	643094974
AX-94439880	1B	492787435
AX-94441156	1B	328643536
AX-94445103	1B	123345654
AX-94447594	1B	499205766
AX-94449890	1B	418805362
AX-94450648	1B	664302506
AX-94451305	1B	344044080
AX-94454402	1B	9264486
AX-94459285	1B	629486985
AX-94459633	1B	610149622
AX-94465678	1B	577187068
AX-94465984	1B	394853587
AX-94466051	1B	12828095
AX-94466262	1B	385162573
AX-94470359	1B	669649535
AX-94470806	1B	329486674
AX-94475367	1B	663607626
AX-94476532	1B	601007240
AX-94479292	1B	614455798
AX-94479851	1B	451570682
AX-94479947	1B	603302379
AX-94483422	1B	522012936
AX-94483811	1B	489134006
AX-94484295	1B	32776200
AX-94488026	1B	330197742
AX-94488882	1B	606840405
AX-94489303	1B	271099428
AX-94490145	1B	113570297
AX-94490210	1B	527001709
AX-94494615	1B	448141350
AX-94495533	1B	409630008
AX-94495814	1B	540847974
AX-94498055	1B	2626406
AX-94500816	1B	286710263
AX-94501371	1B	628514432
AX-94503785	1B	613423060
AX-94504071	1B	527835113
AX-94505744	1B	489759145
AX-94505791	1B	532066132
AX-94505885	1B	471752594
AX-94507852	1B	543085967
AX-94510167	1B	548674760
AX-94511813	1B	348419315
AX-94512829	1B	630921005
AX-94513354	1B	33984144
AX-94514118	1B	120886793
AX-94515822	1B	638930477
AX-94517103	1B	640612450
AX-94517684	1B	642678709
AX-94518238	1B	161210018
AX-94518416	1B	473286194
AX-94519560	1B	651275182
AX-94524314	1B	656852347
AX-94526026	1B	509133088
AX-94526379	1B	282134721
AX-94527035	1B	332839129
AX-94528797	1B	555766156
AX-94532894	1B	512458040
AX-94532960	1B	354919570
AX-94533970	1B	553142989
AX-94534666	1B	626713281
AX-94538713	1B	356298190
AX-94540417	1B	431456792
AX-94540527	1B	434835810
AX-94540531	1B	130018076
AX-94541532	1B	633136143
AX-94544246	1B	476880006
AX-94544446	1B	456253786
AX-94545049	1B	18870312
AX-94545824	1B	282427873
AX-94546683	1B	352460471
AX-94550466	1B	632421932
AX-94553813	1B	630568138
AX-94554649	1B	327959479
AX-94559704	1B	325811455
AX-94561803	1B	637398562
AX-94562966	1B	579778764
AX-94564319	1B	1430915
AX-94564902	1B	646172198
AX-94568418	1B	288548257
AX-94569436	1B	20587828
AX-94572866	1B	148437874
AX-94576646	1B	423961016
AX-94579198	1B	551177523
AX-94580006	1B	181216849
AX-94584338	1B	535690427
AX-94592974	1B	448742632
AX-94596108	1B	668184034
AX-94596291	1B	111263855
AX-94602311	1B	16189259
AX-94602515	1B	423966566
AX-94602901	1B	15448428
AX-94608698	1B	323635561
AX-94609385	1B	14138834
AX-94615605	1B	331424067
AX-94616791	1B	325818540
AX-94618797	1B	520785574
AX-94620168	1B	582905736
AX-94620208	1B	542135988
AX-94620468	1B	586302733
AX-94620619	1B	488820436
AX-94626021	1B	637826795
AX-94626335	1B	90992783
AX-94627462	1B	590411058
AX-94628754	1B	383802156
AX-94632377	1B	553146352
AX-94632775	1B	28626831
AX-94632981	1B	660454560
AX-94633266	1B	489249586
AX-94635059	1B	593604143
AX-94635647	1B	327842866
AX-94638945	1B	263269916
AX-94639818	1B	158309979
AX-94642563	1B	3181032
AX-94643364	1B	351441036
AX-94643420	1B	253003039
AX-94645635	1B	148474425
AX-94647261	1B	631817949
AX-94648555	1B	57379417
AX-94648809	1B	445434071
AX-94659248	1B	513545131
AX-94659327	1B	61668320
AX-94662212	1B	11860832
AX-94664597	1B	651544458
AX-94664720	1B	668056534
AX-94664731	1B	398147322
AX-94664843	1B	531166995
AX-94667549	1B	626725023
AX-94668789	1B	96515495
AX-94673495	1B	664787253
AX-94674342	1B	125638775
AX-94677202	1B	630927087
AX-94680683	1B	420226241
AX-94681412	1B	591113684
AX-94684615	1B	38833879
AX-94685337	1B	36090215
AX-94685469	1B	280167365
AX-94686172	1B	15876857
AX-94687836	1B	449701480
AX-94689744	1B	667717083
AX-94693862	1B	579785607
AX-94695797	1B	632006570
AX-94695810	1B	640610879
AX-94696260	1B	603302475
AX-94698499	1B	277422291
AX-94700217	1B	560712221
AX-94701961	1B	262533339
AX-94704071	1B	357915035
AX-94706391	1B	38834031
AX-94707483	1B	280162919
AX-94708814	1B	56312141
AX-94710520	1B	662031326
AX-94712693	1B	160485023
AX-94716030	1B	555766055
AX-94716273	1B	637499513
AX-94716707	1B	14939756
AX-94717933	1B	326015618
AX-94726578	1B	488819446
AX-94727079	1B	539924284
AX-94728009	1B	28560996
AX-94731046	1B	623448868
AX-94734026	1B	474447853
AX-94735504	1B	24499188
AX-94736092	1B	18419635
AX-94738294	1B	303071427
AX-94748775	1B	652468844
AX-94749797	1B	347021392
AX-94753528	1B	626724490
AX-94763861	1B	346290032
AX-94766122	1B	643102204
AX-94771307	1B	592098474
AX-94774789	1B	622569567
AX-94778393	1B	16693693
AX-94780679	1B	660100867
AX-94783957	1B	643101623
AX-94787480	1B	27236168
AX-94787613	1B	471193698
AX-94793167	1B	629940662
AX-94794804	1B	581412929
AX-94798980	1B	127976709
AX-94801428	1B	9936497
AX-94801647	1B	622571889
AX-94803292	1B	667822772
AX-94804524	1B	662842794
AX-94805000	1B	488600216
AX-94806190	1B	455211861
AX-94807857	1B	652575906
AX-94808850	1B	551032435
AX-94809703	1B	300329894
AX-94810466	1B	640556352
AX-94814014	1B	162780777
AX-94815439	1B	38910617
AX-94817502	1B	666243451
AX-94820127	1B	424538213
AX-94820148	1B	654027162
AX-94821106	1B	420236529
AX-94826587	1B	496095702
AX-94832758	1B	374319412
AX-94834772	1B	583149364
AX-94839014	1B	306067991
AX-94843973	1B	561643248
AX-94844830	1B	15100479
AX-94850114	1B	271900384
AX-94857844	1B	679748728
AX-94860459	1B	599334580
AX-94861978	1B	120405775
AX-94862872	1B	348796811
AX-94867321	1B	91879662
AX-94868998	1B	327957808
AX-94871042	1B	628811624
AX-94873552	1B	613423115
AX-94874112	1B	10204609
AX-94875666	1B	626709476
AX-94877657	1B	94831762
AX-94882923	1B	105687092
AX-94887858	1B	423205018
AX-94889904	1B	443996778
AX-94900228	1B	654027265
AX-94902804	1B	94546140
AX-94906016	1B	357427477
AX-94908088	1B	555298838
AX-94909725	1B	137634442
AX-94912445	1B	24163265
AX-94916753	1B	524154647
AX-94917376	1B	443996902
AX-94921973	1B	504091528
AX-94923277	1B	121406332
AX-94923910	1B	423559119
AX-94925767	1B	4464614
AX-94929285	1B	474448016
AX-94933502	1B	613236084
AX-94936370	1B	150545669
AX-94942913	1B	581412996
AX-94944372	1B	688283156
AX-94945709	1B	136911772
AX-94946875	1B	120888172
AX-94949295	1B	645708529
AX-94954277	1B	613946813
AX-94955953	1B	409630041
AX-94956073	1B	673640952
AX-94958748	1B	657321832
AX-94966305	1B	5519829
AX-94969778	1B	531167036
AX-94970276	1B	333633465
AX-94975230	1B	582690277
AX-94978429	1B	216529294
AX-94978499	1B	589133989
AX-94980064	1B	170298782
AX-94980178	1B	4346095
AX-94981940	1B	112203158
AX-94982852	1B	15142365
AX-94983014	1B	13390865
AX-94990715	1B	60108454
AX-94995102	1B	540729222
AX-95000586	1B	426072910
AX-95000679	1B	34255229
AX-95002138	1B	24491718
AX-95010362	1B	600891225
AX-95011217	1B	565745701
AX-95016115	1B	382221835
AX-95022227	1B	632719426
AX-95026241	1B	532172443
AX-95026652	1B	454917356
AX-95068779	1B	57381516
AX-95069066	1B	555765256
AX-95072911	1B	687802326
AX-95073456	1B	492789034
AX-95081610	1B	532170751
AX-95090516	1B	622476796
AX-95093437	1B	94007263
AX-95097638	1B	120883152
AX-95098685	1B	563673608
AX-95098916	1B	554137363
AX-95101816	1B	589074170
AX-95102767	1B	421096976
AX-95102985	1B	662556432
AX-95104798	1B	633137376
AX-95107346	1B	57085453
AX-95109512	1B	445180700
AX-95112360	1B	651543981
AX-95113634	1B	631818192
AX-95116150	1B	285608131
AX-95121080	1B	213911455
AX-95124337	1B	111368151
AX-95125372	1B	548625137
AX-95126764	1B	674080262
AX-95127635	1B	40386778
AX-95129168	1B	548674084
AX-95134123	1B	672926834
AX-95136941	1B	488658919
AX-95137260	1B	426072884
AX-95140632	1B	470000745
AX-95147141	1B	275357867
AX-95149749	1B	632011255
AX-95152800	1B	16549100
AX-95158976	1B	277442508
AX-95162967	1B	517910981
AX-95166367	1B	94975220
AX-95168722	1B	561705920
AX-95174883	1B	513545075
AX-95174921	1B	510979526
AX-95176409	1B	544130298
AX-95181599	1B	652576227
AX-95182813	1B	642201579
AX-95186565	1B	362605003
AX-95188796	1B	591233408
AX-95193381	1B	647228061
AX-95194502	1B	530453989
AX-95195903	1B	353942521
AX-95196508	1B	4484633
AX-95198436	1B	587525490
AX-95202317	1B	408656937
AX-95202784	1B	641037143
AX-95202964	1B	32769214
AX-95207086	1B	9264662
AX-95208428	1B	587048079
AX-95210470	1B	380885618
AX-95211391	1B	342647869
AX-95215369	1B	530481525
AX-95216871	1B	503875864
AX-95217160	1B	350392302
AX-95218249	1B	417401827
AX-95222999	1B	336352565
AX-95226506	1B	283122170
AX-95226757	1B	9077831
AX-95229302	1B	608465652
AX-95232646	1B	662718722
AX-95234898	1B	589071999
AX-95235129	1B	667214342
AX-95235622	1B	426072397
AX-95238778	1B	327358635
AX-95249170	1B	113212822
AX-95250058	1B	16672239
AX-95250923	1B	551032558
AX-95252958	1B	622313930
AX-95253308	1B	642676405
AX-95253310	1B	526568651
AX-95253616	1B	542958292
AX-95253982	1B	685281743
AX-95254066	1B	327842359
AX-95254907	1B	576219498
AX-95257543	1B	665402211
AX-95258492	1B	26186142
AX-95260484	1B	282427911
AX-95629053	1B	562375102
AX-95629458	1B	449134924
AX-95629900	1B	673161052
AX-95630334	1B	646171937
AX-95630355	1B	520810802
AX-95631688	1B	94832206
AX-95631982	1B	512632182
AX-95652713	1B	530061223
AX-95652981	1B	282277219
AX-95653055	1B	560252490
AX-95653064	1B	242668003
AX-95653365	1B	327842942
AX-95654644	1B	566603733
AX-95658421	1B	91557574
AX-95685405	1B	120884051
AX-94386053	1D	11854042
AX-94387203	1D	436114253
AX-94387545	1D	12162709
AX-94387560	1D	8183446
AX-94390476	1D	52339516
AX-94393474	1D	3967540
AX-94402073	1D	4187989
AX-94403925	1D	408207062
AX-94404343	1D	469833089
AX-94405122	1D	7871979
AX-94409342	1D	33640474
AX-94418622	1D	16408846
AX-94420704	1D	472918425
AX-94427029	1D	209517824
AX-94430584	1D	328446608
AX-94433348	1D	412157919
AX-94433426	1D	162061491
AX-94438477	1D	40580478
AX-94438918	1D	86922976
AX-94440014	1D	28224828
AX-94443420	1D	435928256
AX-94446929	1D	433252851
AX-94447005	1D	416615450
AX-94450439	1D	12315198
AX-94458022	1D	42845373
AX-94458487	1D	408074284
AX-94465855	1D	487858555
AX-94467383	1D	27872034
AX-94472136	1D	494858756
AX-94473370	1D	421023616
AX-94476240	1D	305590589
AX-94484855	1D	33712312
AX-94485300	1D	489549578
AX-94488154	1D	486727525
AX-94488247	1D	418045844
AX-94495992	1D	408238972
AX-94497626	1D	494152663
AX-94502639	1D	15322246
AX-94502711	1D	486118841
AX-94508418	1D	1036478
AX-94508984	1D	488962237
AX-94516050	1D	412091150
AX-94516796	1D	467629415
AX-94522381	1D	5453110
AX-94523535	1D	9664756
AX-94525991	1D	20051213
AX-94531706	1D	18163249
AX-94532440	1D	1852072
AX-94538909	1D	12535552
AX-94541657	1D	10762385
AX-94544116	1D	490145720
AX-94545466	1D	51036790
AX-94551520	1D	413214781
AX-94558256	1D	34621416
AX-94589325	1D	490401961
AX-94600442	1D	486758251
AX-94602417	1D	452488692
AX-94603350	1D	32530004
AX-94603514	1D	9645832
AX-94606615	1D	18099330
AX-94613367	1D	414303471
AX-94627514	1D	416616702
AX-94634012	1D	421223492
AX-94635971	1D	235580025
AX-94653386	1D	6547854
AX-94665385	1D	420928771
AX-94670671	1D	410794844
AX-94673659	1D	416128250
AX-94676183	1D	907190
AX-94679687	1D	50706090
AX-94680809	1D	360152345
AX-94685643	1D	10666809
AX-94686404	1D	492408717
AX-94687380	1D	336344802
AX-94693410	1D	410792173
AX-94700658	1D	433463512
AX-94709034	1D	208097395
AX-94721881	1D	487956662
AX-94722864	1D	7420689
AX-94730854	1D	18591037
AX-94734012	1D	460150519
AX-94761228	1D	15363347
AX-94767250	1D	66556907
AX-94772107	1D	3969410
AX-94773025	1D	421081886
AX-94773494	1D	7906507
AX-94784370	1D	464627343
AX-94789948	1D	459027997
AX-94797441	1D	416473775
AX-94801999	1D	297535814
AX-94803245	1D	10720778
AX-94804842	1D	28575363
AX-94818846	1D	8727512
AX-94820348	1D	18611257
AX-94834421	1D	492534260
AX-94846537	1D	435801553
AX-94852408	1D	196609064
AX-94866237	1D	418669879
AX-94877844	1D	456654246
AX-94891002	1D	421037135
AX-94914889	1D	16403297
AX-94920960	1D	403707133
AX-94924821	1D	46182203
AX-94926518	1D	472527736
AX-94929640	1D	338876693
AX-94936778	1D	47328515
AX-94939596	1D	38781551
AX-94943858	1D	48458906
AX-94950575	1D	4827193
AX-94952154	1D	36842263
AX-94953558	1D	487566099
AX-94958521	1D	282948284
AX-94965765	1D	409530666
AX-94967778	1D	376783108
AX-94972911	1D	3958348
AX-94999990	1D	427155794
AX-95003465	1D	342070118
AX-95004153	1D	412219076
AX-95013700	1D	34626290
AX-95014770	1D	410506625
AX-95022267	1D	473398637
AX-95070780	1D	272189145
AX-95071375	1D	453238839
AX-95089568	1D	480674627
AX-95095821	1D	93118471
AX-95096670	1D	27872142
AX-95097993	1D	4774320
AX-95100401	1D	423277952
AX-95105709	1D	435928218
AX-95110863	1D	8798283
AX-95110895	1D	415415894
AX-95123147	1D	465078260
AX-95124010	1D	37220945
AX-95124952	1D	24786184
AX-95127704	1D	422056178
AX-95129538	1D	42152181
AX-95130318	1D	403237998
AX-95134407	1D	42095231
AX-95141299	1D	452621486
AX-95144375	1D	20569952
AX-95153488	1D	19117136
AX-95153822	1D	785137
AX-95161886	1D	6732857
AX-95168334	1D	419061368
AX-95176449	1D	487167415
AX-95182692	1D	10666814
AX-95191909	1D	19876401
AX-95198554	1D	7608293
AX-95199722	1D	408244399
AX-95206083	1D	413579002
AX-95210211	1D	56528709
AX-95210930	1D	4825038
AX-95215137	1D	50706109
AX-95216543	1D	285443910
AX-95217696	1D	489550392
AX-95224690	1D	455093706
AX-95227165	1D	429699507
AX-95227595	1D	181634410
AX-95229645	1D	416843978
AX-95229843	1D	291091633
AX-95233515	1D	49413480
AX-95234262	1D	485563145
AX-95236185	1D	336344658
AX-95245287	1D	2113445
AX-95247196	1D	487624517
AX-95254832	1D	416614309
AX-95259577	1D	19129475
AX-95629833	1D	487952110
AX-95633119	1D	38787678
AX-95634560	1D	16789272
AX-95681643	1D	458488356
AX-95683498	1D	410464692
AX-94383052	2A	778020723
AX-94383218	2A	17252500
AX-94391163	2A	762762703
AX-94396447	2A	734346615
AX-94406202	2A	711542394
AX-94410389	2A	80871520
AX-94411894	2A	553482409
AX-94412486	2A	739490343
AX-94415873	2A	692062740
AX-94417025	2A	38515173
AX-94417710	2A	715928500
AX-94418841	2A	29719979
AX-94424669	2A	4165051
AX-94426538	2A	763389763
AX-94431032	2A	40823517
AX-94433820	2A	718885461
AX-94436011	2A	259605
AX-94445073	2A	777807685
AX-94451172	2A	30165275
AX-94456186	2A	133469265
AX-94461119	2A	719566734
AX-94464525	2A	42390250
AX-94466314	2A	80538540
AX-94467783	2A	820082
AX-94469670	2A	16865490
AX-94474468	2A	722074358
AX-94479921	2A	82204044
AX-94481517	2A	743988736
AX-94483271	2A	739276612
AX-94483464	2A	755927666
AX-94485323	2A	715816348
AX-94492833	2A	763389730
AX-94495090	2A	747147132
AX-94495564	2A	13135378
AX-94496850	2A	760578410
AX-94496990	2A	692755051
AX-94500838	2A	641952903
AX-94504542	2A	729298625
AX-94512201	2A	29262206
AX-94513270	2A	101846001
AX-94514221	2A	718918960
AX-94514733	2A	627611180
AX-94517392	2A	315768089
AX-94520480	2A	706919713
AX-94527375	2A	12034000
AX-94528064	2A	14484828
AX-94535413	2A	718885300
AX-94538825	2A	103139965
AX-94542148	2A	754461471
AX-94543148	2A	2327058
AX-94547645	2A	639991208
AX-94553666	2A	77528176
AX-94559775	2A	692754743
AX-94560557	2A	764386394
AX-94561631	2A	16725595
AX-94566723	2A	29285540
AX-94569737	2A	820286
AX-94572385	2A	41462628
AX-94576991	2A	709621831
AX-94579959	2A	715946463
AX-94585454	2A	734256868
AX-94586461	2A	759829772
AX-94592550	2A	773186081
AX-94592709	2A	759967897
AX-94593411	2A	750550273
AX-94597104	2A	716482610
AX-94598441	2A	780718220
AX-94602066	2A	738985900
AX-94602991	2A	776022491
AX-94607493	2A	17616996
AX-94611723	2A	766464285
AX-94613797	2A	629109186
AX-94613967	2A	12804945
AX-94618441	2A	754455478
AX-94620698	2A	767763145
AX-94620950	2A	745092866
AX-94625204	2A	722319672
AX-94627731	2A	772373357
AX-94630744	2A	751210380
AX-94634529	2A	93190930
AX-94635171	2A	712308059
AX-94636439	2A	18020476
AX-94639372	2A	30549544
AX-94643237	2A	692633239
AX-94644597	2A	775619889
AX-94649188	2A	3368197
AX-94650880	2A	8719549
AX-94656531	2A	695956320
AX-94662772	2A	748441921
AX-94669780	2A	711976366
AX-94670491	2A	17679710
AX-94673428	2A	739821347
AX-94676956	2A	699514502
AX-94681148	2A	767792065
AX-94682149	2A	640225089
AX-94682380	2A	11638244
AX-94684111	2A	27276062
AX-94685012	2A	764679180
AX-94690771	2A	4171296
AX-94691823	2A	16066165
AX-94695451	2A	136054871
AX-94696230	2A	739712880
AX-94698653	2A	771506671
AX-94701109	2A	691845871
AX-94705447	2A	752797420
AX-94706612	2A	636903253
AX-94706684	2A	695350882
AX-94712259	2A	775614405
AX-94712462	2A	641398356
AX-94713668	2A	763832844
AX-94717890	2A	29883529
AX-94725349	2A	758922963
AX-94732891	2A	715413443
AX-94733849	2A	640820450
AX-94738192	2A	36049154
AX-94738314	2A	711075244
AX-94739692	2A	24060026
AX-94740180	2A	746821529
AX-94756068	2A	42476224
AX-94757208	2A	712576670
AX-94767467	2A	759456211
AX-94770107	2A	81753399
AX-94772652	2A	711077223
AX-94788766	2A	12588214
AX-94799523	2A	694589208
AX-94802107	2A	757948238
AX-94802588	2A	5637299
AX-94813805	2A	755788761
AX-94816730	2A	15270504
AX-94817172	2A	16404769
AX-94819051	2A	625292688
AX-94820368	2A	775981195
AX-94844146	2A	36050409
AX-94860183	2A	19101306
AX-94865707	2A	15948254
AX-94867650	2A	758420888
AX-94876482	2A	752277495
AX-94880760	2A	48862595
AX-94900000	2A	27981585
AX-94900788	2A	17932501
AX-94901370	2A	767132281
AX-94902101	2A	556106396
AX-94910420	2A	740070870
AX-94910470	2A	763695272
AX-94912259	2A	752276415
AX-94924770	2A	735400540
AX-94935158	2A	14939939
AX-94942225	2A	758389697
AX-94947518	2A	755793738
AX-94950462	2A	771512938
AX-94956032	2A	4620582
AX-94957686	2A	735400482
AX-94958873	2A	752090835
AX-94964801	2A	21208013
AX-94970500	2A	752748981
AX-94982574	2A	36884132
AX-94993098	2A	752103397
AX-94995080	2A	734910228
AX-94995671	2A	779645168
AX-95005223	2A	11548803
AX-95018915	2A	739712583
AX-95019569	2A	738387949
AX-95026221	2A	101993974
AX-95069448	2A	8314928
AX-95074396	2A	24113909
AX-95078056	2A	48838101
AX-95079432	2A	779846734
AX-95080933	2A	759465393
AX-95083356	2A	16076470
AX-95090184	2A	773186043
AX-95093243	2A	771512248
AX-95096362	2A	716834915
AX-95097725	2A	99792768
AX-95101680	2A	759489251
AX-95109572	2A	558648231
AX-95110999	2A	690924424
AX-95111070	2A	764668294
AX-95113306	2A	767007398
AX-95114316	2A	692530674
AX-95115385	2A	3965150
AX-95119362	2A	641959141
AX-95131610	2A	779645294
AX-95135556	2A	764821201
AX-95136081	2A	752102391
AX-95143360	2A	635605021
AX-95151839	2A	77335733
AX-95153321	2A	521324716
AX-95155612	2A	79202737
AX-95176936	2A	734976386
AX-95182711	2A	776022569
AX-95182913	2A	770012827
AX-95186991	2A	748537792
AX-95193898	2A	4219437
AX-95200094	2A	42398543
AX-95204060	2A	43687378
AX-95204501	2A	703546522
AX-95211185	2A	742718678
AX-95215460	2A	17616858
AX-95222604	2A	12009072
AX-95223873	2A	631520601
AX-95225412	2A	43137190
AX-95240646	2A	715880930
AX-95246055	2A	11914683
AX-95247860	2A	710363412
AX-95252205	2A	42720544
AX-95629290	2A	709041749
AX-95629948	2A	3111177
AX-95631152	2A	17656663
AX-95631542	2A	775523964
AX-95632233	2A	744809705
AX-95651867	2A	690934270
AX-95681948	2A	15948204
AX-94385043	2B	418666739
AX-94386402	2B	786103229
AX-94387177	2B	611066149
AX-94387960	2B	63782412
AX-94388449	2B	576083378
AX-94388622	2B	65144358
AX-94388689	2B	765070647
AX-94389664	2B	40919384
AX-94390683	2B	10618324
AX-94391038	2B	11910051
AX-94392210	2B	650485729
AX-94393508	2B	542759646
AX-94393895	2B	788665013
AX-94394263	2B	736408727
AX-94394314	2B	13737003
AX-94394763	2B	104062731
AX-94395539	2B	52871581
AX-94399237	2B	769071948
AX-94402003	2B	41144291
AX-94402375	2B	182569885
AX-94405340	2B	388946862
AX-94406845	2B	783227156
AX-94408000	2B	23108587
AX-94408415	2B	728397956
AX-94409188	2B	572591318
AX-94412427	2B	184661592
AX-94415921	2B	10781707
AX-94416965	2B	154251253
AX-94420080	2B	146662033
AX-94422665	2B	97188902
AX-94426428	2B	183262777
AX-94426975	2B	123062357
AX-94427273	2B	7441735
AX-94429000	2B	734048526
AX-94430027	2B	88841394
AX-94430469	2B	8632517
AX-94430710	2B	172984373
AX-94431340	2B	670837404
AX-94431990	2B	657793077
AX-94432295	2B	44405622
AX-94435390	2B	7645663
AX-94440712	2B	563044252
AX-94446897	2B	762502881
AX-94447120	2B	529107876
AX-94448351	2B	403113147
AX-94448868	2B	98295566
AX-94451983	2B	110466498
AX-94452709	2B	596910456
AX-94453648	2B	525074559
AX-94455183	2B	749225185
AX-94457943	2B	156591346
AX-94459404	2B	318243
AX-94459800	2B	52911848
AX-94460663	2B	45041439
AX-94460997	2B	718968030
AX-94461616	2B	571531544
AX-94462701	2B	760883932
AX-94467374	2B	180616436
AX-94473645	2B	405755984
AX-94474254	2B	12076713
AX-94475250	2B	136155308
AX-94475572	2B	594848246
AX-94476746	2B	117624285
AX-94478727	2B	713697676
AX-94479203	2B	781584299
AX-94480196	2B	788804905
AX-94480969	2B	78084178
AX-94483531	2B	26986979
AX-94483726	2B	651932274
AX-94488059	2B	45788614
AX-94490490	2B	759818034
AX-94490562	2B	788799311
AX-94491384	2B	22789251
AX-94494155	2B	412708493
AX-94494684	2B	44411438
AX-94495200	2B	653594855
AX-94498356	2B	387130077
AX-94499725	2B	49317620
AX-94499963	2B	24264583
AX-94501119	2B	729180272
AX-94501322	2B	131571416
AX-94501650	2B	754924126
AX-94501963	2B	731535938
AX-94503284	2B	718966477
AX-94504257	2B	539811500
AX-94505329	2B	89491655
AX-94506088	2B	211530627
AX-94506263	2B	138536901
AX-94506720	2B	454328176
AX-94507617	2B	546614125
AX-94507863	2B	124090593
AX-94509137	2B	49849067
AX-94510910	2B	747179079
AX-94512093	2B	3409810
AX-94514951	2B	3438766
AX-94515318	2B	148589581
AX-94515637	2B	643683902
AX-94516626	2B	456176507
AX-94519631	2B	733745203
AX-94520483	2B	769079525
AX-94520810	2B	562705072
AX-94524136	2B	3303855
AX-94526027	2B	140786085
AX-94526671	2B	5669166
AX-94527643	2B	150597224
AX-94527740	2B	51930364
AX-94527853	2B	180558451
AX-94529210	2B	134995894
AX-94529394	2B	76816753
AX-94530350	2B	601192531
AX-94531341	2B	35387671
AX-94531971	2B	748538465
AX-94533854	2B	715310497
AX-94534867	2B	29032263
AX-94535661	2B	441077495
AX-94537114	2B	37551445
AX-94540157	2B	573594138
AX-94540240	2B	8567346
AX-94540272	2B	778785392
AX-94542864	2B	654485904
AX-94547080	2B	30321898
AX-94548077	2B	13767834
AX-94549347	2B	412665543
AX-94550590	2B	121358976
AX-94552885	2B	181613776
AX-94553340	2B	185806967
AX-94557300	2B	8277734
AX-94558976	2B	599597194
AX-94567292	2B	782122803
AX-94568215	2B	75613744
AX-94570551	2B	77173029
AX-94574371	2B	405755902
AX-94575658	2B	713675896
AX-94577064	2B	140787596
AX-94578499	2B	709825224
AX-94579091	2B	393468425
AX-94579143	2B	13392723
AX-94581232	2B	105696571
AX-94581569	2B	14834601
AX-94584968	2B	262470405
AX-94587505	2B	649477430
AX-94590089	2B	702714575
AX-94603490	2B	456176564
AX-94603703	2B	117870488
AX-94604134	2B	42954039
AX-94604156	2B	732346546
AX-94605091	2B	411142991
AX-94606565	2B	185815376
AX-94607630	2B	412748041
AX-94617948	2B	19072018
AX-94620139	2B	49382914
AX-94621282	2B	72814834
AX-94621294	2B	206115068
AX-94622328	2B	162928030
AX-94626799	2B	141875572
AX-94632483	2B	644149475
AX-94632680	2B	694054458
AX-94632942	2B	44761277
AX-94633439	2B	97952749
AX-94639155	2B	44941370
AX-94641018	2B	788520814
AX-94641170	2B	436037847
AX-94642361	2B	191543459
AX-94642443	2B	390116879
AX-94643264	2B	21746236
AX-94644806	2B	46115201
AX-94645277	2B	44915663
AX-94646265	2B	746037254
AX-94648206	2B	99961084
AX-94648660	2B	675352317
AX-94650282	2B	12952539
AX-94653059	2B	47179304
AX-94655347	2B	76817743
AX-94657996	2B	245008365
AX-94660494	2B	697511730
AX-94661042	2B	118865328
AX-94662379	2B	74250224
AX-94664052	2B	748152562
AX-94666231	2B	746037361
AX-94670978	2B	13767198
AX-94671606	2B	786229960
AX-94671612	2B	695590122
AX-94674489	2B	749147599
AX-94675099	2B	4663408
AX-94679036	2B	782148412
AX-94679104	2B	25736773
AX-94680690	2B	669347129
AX-94680974	2B	48041898
AX-94681880	2B	13913146
AX-94681927	2B	158618930
AX-94684067	2B	785210531
AX-94684920	2B	572164318
AX-94686213	2B	99756475
AX-94688259	2B	731561527
AX-94693685	2B	519015208
AX-94693825	2B	423909561
AX-94694138	2B	798224575
AX-94695244	2B	17456915
AX-94702510	2B	776211899
AX-94705091	2B	655004718
AX-94705205	2B	714779865
AX-94708512	2B	120589912
AX-94710527	2B	212582133
AX-94717768	2B	42277057
AX-94719469	2B	657817430
AX-94720683	2B	91277332
AX-94721391	2B	13913270
AX-94722648	2B	51929307
AX-94723778	2B	154911179
AX-94725049	2B	6309239
AX-94725415	2B	775169670
AX-94734206	2B	206752112
AX-94742759	2B	285049954
AX-94747312	2B	156593974
AX-94748285	2B	6309415
AX-94748707	2B	104817889
AX-94752371	2B	616495945
AX-94754518	2B	24091993
AX-94761251	2B	458622067
AX-94761935	2B	161416933
AX-94770158	2B	569019306
AX-94773766	2B	42795481
AX-94773904	2B	87351774
AX-94775993	2B	617933183
AX-94777151	2B	449515348
AX-94777280	2B	793176619
AX-94781649	2B	46891615
AX-94781750	2B	730562708
AX-94787649	2B	712600400
AX-94791965	2B	731312781
AX-94799716	2B	632010587
AX-94810283	2B	149842992
AX-94814592	2B	76929201
AX-94817181	2B	456019375
AX-94818538	2B	105991620
AX-94820641	2B	389471745
AX-94832924	2B	715030098
AX-94833194	2B	133022887
AX-94838334	2B	381923460
AX-94838738	2B	89545975
AX-94841892	2B	423831112
AX-94842402	2B	54768734
AX-94842524	2B	743746456
AX-94843371	2B	47839811
AX-94843617	2B	6712918
AX-94849048	2B	33944383
AX-94853722	2B	757849429
AX-94858793	2B	99498871
AX-94859562	2B	7067727
AX-94866090	2B	154236773
AX-94867179	2B	45787216
AX-94868858	2B	190971834
AX-94869203	2B	795265206
AX-94871451	2B	409344506
AX-94872426	2B	774717094
AX-94872984	2B	412990277
AX-94876910	2B	184595997
AX-94878119	2B	154253007
AX-94882514	2B	790751851
AX-94884111	2B	795241069
AX-94885706	2B	10784125
AX-94889934	2B	17041145
AX-94891219	2B	144432555
AX-94899712	2B	781181410
AX-94905821	2B	791479465
AX-94908499	2B	769903684
AX-94910126	2B	150141335
AX-94911579	2B	30499414
AX-94917481	2B	798224570
AX-94922941	2B	30158641
AX-94926154	2B	177649957
AX-94932277	2B	725960644
AX-94934089	2B	695732941
AX-94937695	2B	715310683
AX-94942882	2B	448080536
AX-94943068	2B	135456375
AX-94943095	2B	123375366
AX-94944413	2B	180543514
AX-94945263	2B	749043980
AX-94945766	2B	30497799
AX-94948115	2B	772026560
AX-94950070	2B	795066208
AX-94950749	2B	664219756
AX-94951538	2B	103962201
AX-94960714	2B	14951848
AX-94961408	2B	712600212
AX-94964411	2B	445679531
AX-94966965	2B	30158452
AX-94967288	2B	565074216
AX-94970352	2B	786105457
AX-94971522	2B	97436554
AX-94972565	2B	7814466
AX-94974196	2B	24853640
AX-94975611	2B	143136556
AX-94978520	2B	792711253
AX-94982820	2B	133007073
AX-94987799	2B	652615059
AX-94989154	2B	123136759
AX-94989593	2B	16856394
AX-94990648	2B	28340529
AX-94996419	2B	755012235
AX-94997378	2B	135006168
AX-94997901	2B	142373489
AX-94999252	2B	118693557
AX-95003644	2B	41960665
AX-95005576	2B	46088498
AX-95009550	2B	523083587
AX-95010361	2B	747855095
AX-95013696	2B	142245380
AX-95014417	2B	540424987
AX-95017536	2B	754924078
AX-95022624	2B	154253007
AX-95024633	2B	6210321
AX-95070164	2B	125253859
AX-95077881	2B	142675939
AX-95078043	2B	560185913
AX-95082190	2B	58074514
AX-95082873	2B	140765090
AX-95084761	2B	784545698
AX-95086847	2B	412662190
AX-95087802	2B	137440132
AX-95089630	2B	8342919
AX-95095565	2B	123062397
AX-95100361	2B	182012095
AX-95102360	2B	701763191
AX-95105278	2B	104832888
AX-95109622	2B	644147162
AX-95110488	2B	100342021
AX-95110901	2B	729747002
AX-95112632	2B	9120875
AX-95113483	2B	747179749
AX-95116218	2B	775493589
AX-95121230	2B	795066743
AX-95122157	2B	743322929
AX-95123059	2B	638262102
AX-95132513	2B	572589587
AX-95132773	2B	126738769
AX-95134351	2B	437003154
AX-95136299	2B	770684873
AX-95139144	2B	7448552
AX-95140179	2B	714779851
AX-95142963	2B	760890453
AX-95146413	2B	42277006
AX-95147733	2B	741476083
AX-95150897	2B	115839440
AX-95151122	2B	573200285
AX-95153510	2B	6405994
AX-95153592	2B	46878708
AX-95154971	2B	16268725
AX-95155035	2B	168622310
AX-95155675	2B	14834581
AX-95156023	2B	453030301
AX-95158415	2B	529257684
AX-95158512	2B	13766527
AX-95158963	2B	153223758
AX-95160459	2B	63857067
AX-95163397	2B	29039811
AX-95165387	2B	747821355
AX-95166376	2B	399353854
AX-95171145	2B	694051094
AX-95172612	2B	158618124
AX-95173587	2B	12076610
AX-95179299	2B	779341582
AX-95180795	2B	442796872
AX-95183980	2B	454325436
AX-95184450	2B	779344603
AX-95190992	2B	793046354
AX-95194220	2B	69413690
AX-95197220	2B	24913779
AX-95199082	2B	704729572
AX-95199286	2B	664219794
AX-95201364	2B	3604082
AX-95201639	2B	723042984
AX-95204004	2B	576092256
AX-95204493	2B	140844506
AX-95206454	2B	692712251
AX-95208568	2B	416874848
AX-95215205	2B	30158704
AX-95216074	2B	25017801
AX-95216700	2B	6337930
AX-95219673	2B	671741110
AX-95225349	2B	563310526
AX-95228433	2B	714499127
AX-95230131	2B	638261899
AX-95231094	2B	88931448
AX-95231419	2B	391770864
AX-95231966	2B	41153635
AX-95233361	2B	388104981
AX-95234063	2B	449841620
AX-95235481	2B	453017021
AX-95237379	2B	8343110
AX-95238403	2B	52598008
AX-95241215	2B	764074062
AX-95241300	2B	99756540
AX-95242045	2B	780590718
AX-95246868	2B	643297993
AX-95248718	2B	731481895
AX-95255281	2B	442569664
AX-95255429	2B	72819186
AX-95256964	2B	737490832
AX-95260757	2B	749418335
AX-95629283	2B	593675126
AX-95630054	2B	25236591
AX-95630577	2B	655014328
AX-95631191	2B	694051035
AX-95652333	2B	189603525
AX-95652625	2B	747821525
AX-95652972	2B	105375880
AX-95654169	2B	699109351
AX-95682249	2B	14047984
AX-95685212	2B	141641187
AX-94384278	2D	618149674
AX-94384624	2D	10323298
AX-94386916	2D	600406066
AX-94387409	2D	70523116
AX-94387422	2D	87237322
AX-94389356	2D	637517204
AX-94393403	2D	80820393
AX-94396079	2D	1603169
AX-94399770	2D	626649817
AX-94401150	2D	549729206
AX-94401674	2D	607638792
AX-94401725	2D	80820393
AX-94405090	2D	569843267
AX-94406957	2D	32809658
AX-94407064	2D	649858152
AX-94420236	2D	37461315
AX-94422387	2D	611529918
AX-94424412	2D	617973607
AX-94425114	2D	594537180
AX-94428525	2D	602514565
AX-94429736	2D	543844576
AX-94435136	2D	619954149
AX-94441918	2D	76529339
AX-94443352	2D	26613218
AX-94444526	2D	30405070
AX-94448484	2D	421819733
AX-94448732	2D	374073964
AX-94451202	2D	78793706
AX-94455930	2D	641485253
AX-94456678	2D	600342386
AX-94456805	2D	644093426
AX-94457291	2D	621067395
AX-94457532	2D	35791297
AX-94460712	2D	451289300
AX-94461801	2D	76794996
AX-94462967	2D	483065617
AX-94464095	2D	636190642
AX-94464166	2D	11574034
AX-94465810	2D	648474001
AX-94467395	2D	617409538
AX-94468695	2D	79421706
AX-94468948	2D	223903898
AX-94471357	2D	468857800
AX-94477489	2D	605100557
AX-94479119	2D	79087584
AX-94479993	2D	22768647
AX-94481552	2D	36798253
AX-94487982	2D	588675894
AX-94491276	2D	461537032
AX-94494699	2D	381564651
AX-94495062	2D	7587514
AX-94496067	2D	645651102
AX-94498457	2D	13624512
AX-94499379	2D	533669160
AX-94500178	2D	578930776
AX-94501170	2D	639688545
AX-94502699	2D	56203334
AX-94508473	2D	568078071
AX-94510027	2D	68792273
AX-94511393	2D	66764455
AX-94512891	2D	27926980
AX-94518036	2D	600406789
AX-94525439	2D	571880218
AX-94525577	2D	587107149
AX-94530698	2D	27992113
AX-94532065	2D	375606707
AX-94532422	2D	593695362
AX-94533034	2D	38237377
AX-94533747	2D	2048429
AX-94536025	2D	74934503
AX-94538197	2D	620282420
AX-94538798	2D	601245208
AX-94543034	2D	634476770
AX-94543041	2D	60790425
AX-94546695	2D	544655675
AX-94552380	2D	406149072
AX-94554516	2D	2363017
AX-94554953	2D	60021872
AX-94557591	2D	110665510
AX-94564811	2D	608480310
AX-94568183	2D	15609442
AX-94572349	2D	613818629
AX-94572690	2D	590091923
AX-94573462	2D	574387192
AX-94582505	2D	75251276
AX-94590107	2D	580388578
AX-94594630	2D	549509876
AX-94597260	2D	648238635
AX-94598102	2D	1638170
AX-94599595	2D	12870489
AX-94601746	2D	610289438
AX-94601908	2D	605370991
AX-94603120	2D	33370585
AX-94605170	2D	601273164
AX-94606251	2D	468857761
AX-94609984	2D	12414682
AX-94618911	2D	94338369
AX-94621473	2D	94390422
AX-94622664	2D	608540960
AX-94624477	2D	592633358
AX-94625572	2D	594472090
AX-94628725	2D	588122302
AX-94630543	2D	29184696
AX-94639122	2D	73023093
AX-94642093	2D	7168445
AX-94642953	2D	27979133
AX-94648669	2D	640299117
AX-94649541	2D	14127162
AX-94652914	2D	78711368
AX-94656661	2D	80834650
AX-94662189	2D	74929599
AX-94669346	2D	609234499
AX-94670144	2D	349559644
AX-94676020	2D	35791323
AX-94687276	2D	5326078
AX-94687724	2D	577152483
AX-94691643	2D	623409681
AX-94697254	2D	33710135
AX-94698565	2D	560862111
AX-94703176	2D	36538856
AX-94706287	2D	356029054
AX-94708441	2D	600131665
AX-94709792	2D	628598976
AX-94713939	2D	58777416
AX-94714491	2D	11856190
AX-94714890	2D	643665820
AX-94717544	2D	83932286
AX-94719237	2D	59006841
AX-94719492	2D	59551293
AX-94721306	2D	590240044
AX-94724239	2D	9346367
AX-94732478	2D	593231353
AX-94735052	2D	619312344
AX-94752493	2D	60607566
AX-94761061	2D	81655160
AX-94764187	2D	645683399
AX-94766435	2D	611212108
AX-94770677	2D	645046652
AX-94774424	2D	484794010
AX-94782857	2D	632468296
AX-94786006	2D	610277424
AX-94788022	2D	596006273
AX-94798100	2D	30612744
AX-94803197	2D	31886984
AX-94806590	2D	19581358
AX-94806968	2D	593898133
AX-94822753	2D	577111615
AX-94825789	2D	30659234
AX-94829628	2D	78080397
AX-94831668	2D	610289340
AX-94835810	2D	584799948
AX-94843653	2D	5326208
AX-94843839	2D	588134873
AX-94844648	2D	74934749
AX-94846484	2D	115942345
AX-94855970	2D	71760947
AX-94868861	2D	633851061
AX-94876999	2D	579900746
AX-94886394	2D	608200589
AX-94887553	2D	580238574
AX-94900003	2D	609422252
AX-94910560	2D	7168580
AX-94912446	2D	577601637
AX-94916940	2D	585477122
AX-94918833	2D	608979323
AX-94933613	2D	523162611
AX-94937541	2D	32294485
AX-94941828	2D	579389418
AX-94946415	2D	27778339
AX-94949271	2D	69504871
AX-94950788	2D	430606398
AX-94952546	2D	18232211
AX-94960300	2D	14254326
AX-94962360	2D	596914793
AX-94965212	2D	574351488
AX-94967993	2D	616150982
AX-94969221	2D	621064106
AX-94971275	2D	585376510
AX-94974227	2D	12876732
AX-94982994	2D	596914535
AX-94984781	2D	571080777
AX-94988703	2D	67441387
AX-94990747	2D	640232466
AX-94991110	2D	643686718
AX-94994757	2D	38545748
AX-94995858	2D	170406360
AX-94998421	2D	598329534
AX-95001945	2D	605100867
AX-95007159	2D	619598737
AX-95008796	2D	38251210
AX-95009062	2D	12978253
AX-95010230	2D	650326536
AX-95014527	2D	250205098
AX-95020885	2D	62614963
AX-95069113	2D	451289145
AX-95081347	2D	73426483
AX-95085239	2D	548271486
AX-95086251	2D	17310873
AX-95089362	2D	186996423
AX-95089688	2D	74981611
AX-95092172	2D	649781103
AX-95093372	2D	70633988
AX-95094464	2D	526516335
AX-95096173	2D	650748976
AX-95096995	2D	619732219
AX-95097352	2D	65638502
AX-95099260	2D	71208300
AX-95100737	2D	587107367
AX-95108498	2D	12923300
AX-95110141	2D	33880251
AX-95118843	2D	80105362
AX-95129265	2D	146405345
AX-95140911	2D	651606397
AX-95142696	2D	73589204
AX-95146135	2D	587702160
AX-95146929	2D	1609331
AX-95158002	2D	25296705
AX-95165682	2D	78798203
AX-95166954	2D	572068580
AX-95168029	2D	78379678
AX-95171186	2D	67552619
AX-95172496	2D	11195033
AX-95173572	2D	37258651
AX-95175956	2D	650963421
AX-95181171	2D	649061712
AX-95183899	2D	641106101
AX-95189524	2D	257201253
AX-95194284	2D	75251454
AX-95197137	2D	586839198
AX-95198137	2D	643193656
AX-95198580	2D	13440250
AX-95199267	2D	27652720
AX-95200558	2D	599291165
AX-95200701	2D	651416448
AX-95209577	2D	580389326
AX-95210917	2D	37258064
AX-95211476	2D	644337411
AX-95216277	2D	82226563
AX-95217264	2D	27778336
AX-95228764	2D	42885894
AX-95236295	2D	82654597
AX-95238557	2D	630426176
AX-95250040	2D	574351145
AX-95253902	2D	75394906
AX-95254619	2D	69251614
AX-95254658	2D	590988712
AX-95256064	2D	2470315
AX-95629830	2D	67233688
AX-95629881	2D	66868572
AX-95630432	2D	78392291
AX-95633336	2D	618149739
AX-95652891	2D	181596878
AX-95652894	2D	446600422
AX-95657294	2D	109702632
AX-94382546	3A	714155869
AX-94383568	3A	683071576
AX-94395014	3A	723181822
AX-94399040	3A	24057407
AX-94405021	3A	611948519
AX-94413203	3A	450711908
AX-94415617	3A	711072940
AX-94417635	3A	32385599
AX-94422775	3A	487436658
AX-94429024	3A	47824725
AX-94429606	3A	387297483
AX-94430923	3A	478663130
AX-94434800	3A	83722160
AX-94435188	3A	477708738
AX-94436234	3A	5.62267e+07
AX-94439195	3A	627962587
AX-94443246	3A	66166589
AX-94444729	3A	720437269
AX-94445780	3A	54657824
AX-94455123	3A	683193285
AX-94455403	3A	697558529
AX-94457296	3A	431074579
AX-94460524	3A	695501858
AX-94461092	3A	12494317
AX-94462045	3A	53222107
AX-94468018	3A	53827370
AX-94470714	3A	53204808
AX-94472776	3A	374878909
AX-94475547	3A	168839105
AX-94476007	3A	663297662
AX-94476859	3A	57568625
AX-94477684	3A	739152993
AX-94479536	3A	686171772
AX-94480742	3A	434613968
AX-94481094	3A	613393040
AX-94486651	3A	14045732
AX-94489717	3A	6892255
AX-94491218	3A	603803774
AX-94491950	3A	53836986
AX-94494353	3A	511754877
AX-94494425	3A	46717056
AX-94495683	3A	697456648
AX-94496249	3A	506434888
AX-94498487	3A	13090428
AX-94498619	3A	691106993
AX-94499849	3A	600007728
AX-94501648	3A	667793607
AX-94508109	3A	534179960
AX-94509782	3A	658701701
AX-94512055	3A	201498866
AX-94512274	3A	56087533
AX-94517997	3A	288606679
AX-94520490	3A	8325651
AX-94520713	3A	478256902
AX-94522863	3A	12853955
AX-94523251	3A	72672739
AX-94525104	3A	652820340
AX-94526136	3A	456704460
AX-94526152	3A	721666229
AX-94527023	3A	627817127
AX-94529341	3A	711296298
AX-94535949	3A	506434091
AX-94541408	3A	658199017
AX-94542697	3A	11350680
AX-94543296	3A	528555171
AX-94552167	3A	642959221
AX-94558703	3A	14293256
AX-94559643	3A	739287477
AX-94565139	3A	522060063
AX-94567027	3A	726137811
AX-94575413	3A	8575183
AX-94575997	3A	36492079
AX-94592827	3A	697446790
AX-94593160	3A	14041238
AX-94599436	3A	538015030
AX-94602015	3A	503849316
AX-94602345	3A	430333110
AX-94605618	3A	693487088
AX-94606333	3A	479782399
AX-94610249	3A	55723147
AX-94618228	3A	513608185
AX-94621725	3A	56143543
AX-94625034	3A	47644522
AX-94628398	3A	112925013
AX-94629396	3A	685121087
AX-94630312	3A	433409072
AX-94638038	3A	663184580
AX-94644333	3A	734788113
AX-94651794	3A	648027555
AX-94655492	3A	659974898
AX-94659266	3A	540669124
AX-94660817	3A	717903314
AX-94662400	3A	42382435
AX-94671257	3A	241921973
AX-94673667	3A	667162744
AX-94676993	3A	487439471
AX-94681091	3A	12814006
AX-94681257	3A	709126268
AX-94684189	3A	43285468
AX-94685875	3A	15692204
AX-94687172	3A	711059308
AX-94697780	3A	691091949
AX-94700643	3A	739147183
AX-94709825	3A	487458205
AX-94713013	3A	669524837
AX-94714911	3A	682976438
AX-94725995	3A	12997619
AX-94728219	3A	697558443
AX-94741615	3A	737210348
AX-94743968	3A	10300856
AX-94745838	3A	9549032
AX-94746338	3A	739992182
AX-94752388	3A	1623034
AX-94763063	3A	649032469
AX-94765551	3A	480102883
AX-94766803	3A	26040630
AX-94767203	3A	41625512
AX-94769054	3A	23275295
AX-94772693	3A	20773153
AX-94776233	3A	602920180
AX-94779070	3A	532450284
AX-94794373	3A	642926768
AX-94796606	3A	53183476
AX-94798864	3A	516790713
AX-94799731	3A	10305254
AX-94804204	3A	724057175
AX-94813749	3A	168224659
AX-94815474	3A	414424
AX-94820825	3A	10303274
AX-94821666	3A	51475258
AX-94830933	3A	726140572
AX-94842717	3A	720222969
AX-94845331	3A	10216660
AX-94846213	3A	731089519
AX-94850054	3A	669567947
AX-94850387	3A	714611110
AX-94862311	3A	9549106
AX-94865983	3A	539376552
AX-94895903	3A	750710711
AX-94901181	3A	699753011
AX-94905220	3A	32173629
AX-94906819	3A	35050525
AX-94915176	3A	624538317
AX-94935938	3A	516641456
AX-94937664	3A	663580260
AX-94938411	3A	56675857
AX-94941121	3A	611702554
AX-94943204	3A	480433970
AX-94943274	3A	724485343
AX-94944930	3A	14849832
AX-94945015	3A	413415
AX-94954991	3A	47850471
AX-94956045	3A	47548422
AX-94957173	3A	709190706
AX-94962492	3A	700809113
AX-94964073	3A	749278646
AX-94969670	3A	9852648
AX-94972681	3A	456776729
AX-94976911	3A	13354649
AX-94983266	3A	631281663
AX-94994948	3A	50382770
AX-94995972	3A	144155548
AX-95006398	3A	638334696
AX-95007313	3A	531896583
AX-95008057	3A	484643262
AX-95009752	3A	20308498
AX-95013434	3A	659935463
AX-95023272	3A	13405077
AX-95024816	3A	725838969
AX-95072537	3A	535193810
AX-95075882	3A	86369509
AX-95076043	3A	643186058
AX-95077070	3A	12253803
AX-95079372	3A	739521074
AX-95084299	3A	10302889
AX-95084434	3A	431822454
AX-95085391	3A	739323668
AX-95086742	3A	705598078
AX-95087317	3A	484635509
AX-95097644	3A	697787084
AX-95099226	3A	476401358
AX-95099434	3A	434614937
AX-95109314	3A	685120900
AX-95109994	3A	57019512
AX-95116867	3A	19608686
AX-95117606	3A	56394640
AX-95127888	3A	17702882
AX-95131220	3A	710278364
AX-95132491	3A	683187888
AX-95134564	3A	671144077
AX-95134755	3A	8862939
AX-95141489	3A	627865092
AX-95148936	3A	32173293
AX-95149573	3A	739683474
AX-95156721	3A	20558245
AX-95163658	3A	42031703
AX-95163812	3A	739516841
AX-95168777	3A	401710412
AX-95171598	3A	235213795
AX-95175527	3A	35463415
AX-95177395	3A	481069170
AX-95180116	3A	9605778
AX-95200718	3A	697787158
AX-95203513	3A	476300528
AX-95204178	3A	479782760
AX-95207768	3A	656104843
AX-95213274	3A	715144266
AX-95226287	3A	739567320
AX-95230073	3A	700564359
AX-95232814	3A	683071252
AX-95233503	3A	652821822
AX-95241788	3A	478254474
AX-95242629	3A	735975669
AX-95250805	3A	83726432
AX-95251523	3A	711065505
AX-95252995	3A	47496444
AX-95257035	3A	686784088
AX-95260911	3A	724319928
AX-95629749	3A	535326733
AX-95629792	3A	543178660
AX-95630125	3A	638446514
AX-95630128	3A	38037262
AX-95630244	3A	37826047
AX-95630394	3A	711202928
AX-95630605	3A	521304691
AX-95632877	3A	484105108
AX-95660637	3A	686127725
AX-94382065	3B	13756236
AX-94383106	3B	485689855
AX-94383465	3B	5940045
AX-94383985	3B	147683153
AX-94385392	3B	487495287
AX-94386613	3B	658492871
AX-94387053	3B	24940309
AX-94388729	3B	7373468
AX-94389261	3B	484872111
AX-94390161	3B	145466769
AX-94396680	3B	386595149
AX-94396693	3B	20543840
AX-94396853	3B	60868255
AX-94399884	3B	79288587
AX-94400252	3B	815047033
AX-94400647	3B	801317089
AX-94403562	3B	807288990
AX-94405214	3B	810269381
AX-94407509	3B	719922236
AX-94409249	3B	126000659
AX-94411056	3B	664840170
AX-94414229	3B	769483569
AX-94415455	3B	823425879
AX-94418850	3B	9881244
AX-94419462	3B	556092379
AX-94419845	3B	592652603
AX-94421831	3B	691661510
AX-94421844	3B	1588009
AX-94424152	3B	786856639
AX-94425087	3B	772399790
AX-94425327	3B	403111749
AX-94426011	3B	721041861
AX-94426732	3B	749864137
AX-94427517	3B	556938620
AX-94428696	3B	68291251
AX-94428728	3B	299598299
AX-94429243	3B	659787974
AX-94430973	3B	18873524
AX-94431987	3B	344976572
AX-94433176	3B	2958646
AX-94435214	3B	144813769
AX-94435438	3B	17902306
AX-94436871	3B	145502633
AX-94437276	3B	175103345
AX-94437683	3B	488530449
AX-94439519	3B	188246471
AX-94440104	3B	59213510
AX-94442100	3B	622477058
AX-94445203	3B	75959712
AX-94445508	3B	811227078
AX-94449743	3B	54796161
AX-94452589	3B	3904575
AX-94453997	3B	79289530
AX-94454233	3B	623149184
AX-94461356	3B	485693272
AX-94461461	3B	514651770
AX-94462133	3B	353470031
AX-94466684	3B	481625190
AX-94468289	3B	504982766
AX-94468489	3B	21346104
AX-94473219	3B	798337811
AX-94474153	3B	776031904
AX-94474208	3B	609306781
AX-94474764	3B	416122724
[truncated: 3,203 more rows]

## Sheet: Supplementary Table S3
Supplementary Table S3. Genotype BLUEs and fixed-effect covariates used for GWAS.
Name	AUDPC_N_HT18	AUDPC_N_HT44	AUDPC_N_HT53	AUDPC_N_HT74	AUDPC_N_HT96	AUDPC_P_HT18	AUDPC_P_HT44	AUDPC_P_HT53	AUDPC_P_HT74	AUDPC_P_HT96	Family_Code	Tetraploid_Donor
SHW.BC.144.10.1.8.1	-34.7054	-114.25	-58.7936	-12.9671	-47.1433	-80.8199	-66.5408	-233.296	-114.386	-82.8966	144	1
SHW.BC.144.12.1.4.1	-34.0794	160.135	-8.63207	-23.1673	-16.8782	-8.71053	4.97518	62.957	23.1671	69.6	144	1
SHW.BC.144.12.1.2.1	83.9206	250.882	-3.63207	97.4994	183.122	-8.71053	8.78871	62.957	23.1671	69.6	144	1
SHW.BC.144.12.1.1.1	170.921	84.2149	-1.9654	200.999	90.6218	-8.71053	8.78871	62.957	23.1671	69.6	144	1
SHW.054	5.58988	156.091	25.7963	185.313	66.4372	16.0106	34.3309	59.1477	57.3065	40.0783	212	1
SHW.BC.144.2.1.5.1	92.1968	36.7277	33.2509	126.729	15.0479	-39.691	-32.6675	-158.407	-90.0266	-80.8201	144	1
SHW.035	28.9732	224.411	112.072	40.0357	71.5385	1.6404	24.551	-2.65542	-4.51729	1.06996	144	1
SHW.BC.212.10.3.1.1	179.683	255.706	127.472	448.916	232.52	75.6914	1.20584	115.818	77.7338	70.1071	212	1
SHW.BC.144.6.1.3.1	171.595	334.675	128.827	140.936	187.819	11.5242	-21.178	-61.5598	-27.2564	-33.1413	144	1
SHW.BC.233.1.3.1.1	163.699	225.275	129.842	1353.37	-12.1518	-48.944	-4.56237	153.925	88.9061	9.43837	233	2
SHW.BC.233.1.4.1.1	125.366	816.393	129.842	1394.2	107.848	-48.944	-81.8323	153.925	18.9061	9.43837	233	2
SHW.BC.144.2.1.4.1	216.55	130.706	134.795	130.629	109.983	1.19924	1.20584	-83.5176	-66.477	-78.766	144	1
SHW.BC.144.6.1.2.1	216.55	282.372	134.795	126.629	188.316	1.19924	1.20584	-83.5176	-66.477	-78.766	144	1
SHW.BC.144.6.1.8.1	216.55	NA	138.129	126.629	219.983	1.19924	NA	-83.5176	-66.477	-78.766	144	1
SHW.BC.144.5.1.4.1	226.55	308.563	141.462	136.629	166.65	1.19924	1.20584	-83.5176	-66.477	-78.766	144	1
SHW.BC.144.6.1.6.1	216.55	498.563	141.462	221.629	361.65	1.19924	1.20584	-83.5176	-66.477	-78.766	144	1
SHW.BC.144.6.1.1.1	220.55	1199.04	142.795	226.629	324.983	1.19924	1.20584	-83.5176	-66.477	-78.766	144	1
SHW.BC.212.3.7.1.1	257.923	125.513	181.646	466.487	394.909	80.0935	39.3671	146.449	131.281	95.331	212	1
SHW.BC.144.10.1.2.1	495.687	NA	189.029	111.518	77.8057	-109.876	NA	-354.213	-189.257	-171.425	144	1
SHW.BC.144.2.1.1.1	272.55	64.277	189.795	140.629	104.983	1.19924	1.20584	-83.5176	-66.477	-78.766	144	1
SHW.BC.144.2.1.7.1	220.55	185.706	194.795	126.629	92.9829	1.19924	1.20584	-79.5176	-66.477	-78.766	144	1
SHW.BC.233.9.1.1.1	-82.9672	889.275	201.842	1159.2	1084.51	-48.944	-4.56237	153.925	178.906	9.43837	233	2
SHW.BC.144.5.1.8.1	219.883	807.372	206.795	130.629	150.983	1.19924	1.20584	-83.5176	-66.477	-78.766	144	1
SHW.BC.212.11.5.2.1	409.683	150.706	207.472	380.582	221.687	75.6914	1.20584	115.818	77.7338	70.1071	212	1
SHW.BC.212.12.8.1.1	394.683	572.372	220.805	247.249	139.187	82.358	229.539	115.818	117.734	70.1071	212	1
SHW.BC.144.5.1.3.1	265.121	832.372	230.795	181.629	153.316	1.19924	1.20584	-83.5176	-66.477	-78.766	144	1
SHW.BC.144.5.1.2.1	274.05	249.706	239.795	266.629	239.983	1.19924	1.20584	-83.5176	-66.477	-78.766	144	1
SHW.BC.144.2.1.3.1	453.217	690.706	239.795	306.629	224.983	14.5326	1.20584	-83.5176	-31.477	-78.766	144	1
SHW.BC.233.1.1.1.1	-136.301	730.56	239.842	873.905	556.182	-48.944	-81.8323	189.925	96.6229	9.43837	233	2
SHW.BC.212.2.5.1.1	966.923	1128.51	249.979	1187.99	566.909	725.093	284.367	146.449	873.281	95.331	212	1
SHW.BC.144.12.1.8.1	543.921	554.215	253.368	419.499	447.122	-8.71053	8.78871	62.957	23.1671	69.6	144	1
SHW.BC.233.8.4.1.1	1455.37	1165.27	261.842	792.535	1037.85	-48.944	-4.56237	153.925	28.9061	9.43837	233	2
SHW.BC.144.12.1.5.1	490.216	656.782	281.343	357.26	455.995	-12.9856	46.7764	50.3672	10.9086	43.3702	144	1
SHW.BC.212.10.2.1.1	126.518	-58.7458	284.141	108.042	140.124	96.4917	20.7142	137.427	116.895	78.9527	212	1
SHW.BC.212.11.5.1.1	250.402	173.377	287.143	366.342	184.363	94.5893	1.3091	122.071	89.9755	66.3613	212	1
SHW.BC.212.11.2.1.1	229.522	173.06	294.942	195.571	149.848	-5.28834	-81.8323	-45.955	36.6229	9.43837	212	1
SHW.BC.144.5.1.7.1	255.121	1014.46	299.081	148.296	114.983	1.19924	1.20584	-83.5176	-66.477	-78.766	144	1
SHW.BC.212.3.2.2.1	489.923	187.513	322.979	821.987	610.409	80.0935	39.3671	146.449	131.281	95.331	212	1
SHW.BC.144.5.1.6.1	284.05	968.563	326.462	160.629	266.983	1.19924	1.20584	-83.5176	-66.477	-78.766	144	1
SHW.BC.233.8.8.1.1	873.699	1223.27	332.342	1455.87	767.848	-48.944	155.438	153.925	206.906	9.43837	233	2
SHW.BC.212.2.8.1.1	525.923	1341.01	332.979	999.987	472.909	152.093	39.3671	146.449	429.281	95.331	212	1
SHW.BC.212.10.2.2.1	605.923	915.513	334.979	810.653	622.909	80.0935	39.3671	146.449	131.281	95.331	212	1
SHW.BC.212.3.6.1.1	378.59	243.513	346.979	425.987	582.909	80.0935	39.3671	146.449	131.281	95.331	212	1
SHW.BC.233.8.6.1.1	265.366	1317.27	354.842	1153.87	984.515	-48.944	-4.56237	153.925	-41.0939	9.43837	233	2
SHW.BC.212.10.4.1.1	339.683	193.706	355.805	387.249	773.187	75.6914	1.20584	115.818	77.7338	70.1071	212	1
SHW.BC.212.10.5.2.1	426.379	-564.725	356.609	-199.131	229.848	-5.28834	-4.56237	-45.955	-41.0939	9.43837	212	1
SHW.BC.212.11.4.2.1	624.683	305.706	357.472	557.249	845.853	75.6914	1.20584	115.818	77.7338	70.1071	212	1
SHW.BC.212.1.8.2.1	684.512	861.991	384.82	534.354	504.535	-17.2607	85.4733	37.3342	-1.34993	17.1404	212	1
SHW.075	83.8203	382.907	387.931	346.135	13.0403	-16.1613	118.9	66.1569	72.2431	4.44794	233	2
SHW.BC.212.3.3.1.1	809.923	498.513	404.979	805.987	345.409	80.0935	39.3671	146.449	131.281	95.331	212	1
SHW.BC.233.8.7.1.1	293.699	1173.27	407.842	1027.54	831.848	-48.944	59.4376	153.925	28.9061	9.43837	233	2
SHW.BC.212.10.4.2.1	298.016	601.706	410.805	642.249	172.52	75.6914	1.20584	115.818	77.7338	70.1071	212	1
SHW.BC.233.8.5.1.1	1370.37	1265.27	413.842	1115.87	1125.85	54.3894	-4.56237	153.925	557.239	9.43837	233	2
SHW.BC.144.9.1.6.1	815.189	1243.27	429.704	58.3688	582.848	-5.28834	-4.56237	-45.955	68.9061	9.43837	144	1
SHW.BC.144.11.1.8.1	920.921	236.882	431.368	783.499	543.122	-8.71053	8.78871	62.957	23.1671	69.6	144	1
SHW.BC.233.8.2.1.1	1252.94	875.294	437.906	1139.65	720.474	32.5633	-1.57476	141.165	30.5616	35.909	233	2
SHW.BC.233.2.1.1.1	750.366	1181.94	465.842	1314.44	534.515	86.056	345.438	223.925	830.335	9.43837	233	2
SHW.BC.144.2.1.6.1	697.524	550.09	467.369	550.533	620.161	57.562	1.30893	22.9122	17.8701	-8.09585	144	1
SHW.BC.144.5.1.1.1	507.941	668.839	480.542	427.723	498.814	23.7827	7.26377	64.51	32.4915	39.0932	144	1
SHW.BC.233.1.5.1.1	61.1994	981.941	489.842	1515.87	-12.1518	-48.944	112.104	153.925	-41.0939	9.43837	233	2
SHW.BC.233.2.4.1.1	539.699	1156.7	501.842	1190.87	451.848	297.056	224.009	153.925	677.656	9.43837	233	2
SHW.BC.212.1.3.2.1	621.628	524.299	507.364	374.429	313.632	29.3506	43.4381	76.4029	38.4621	43.5267	212	1
SHW.BC.212.3.5.1.1	449.423	446.847	512.479	739.987	412.909	80.0935	39.3671	146.449	131.281	95.331	212	1
SHW.BC.212.11.4.1.1	553.016	341.706	530.805	340.582	609.187	75.6914	1.20584	115.818	77.7338	70.1071	212	1
SHW.BC.144.9.1.8.1	814.021	NA	538.696	897.518	630.806	-109.876	NA	-287.547	-161.257	-167.425	144	1
SHW.BC.212.3.2.1.1	148.59	233.513	542.979	729.987	544.909	80.0935	39.3671	146.449	131.281	95.331	212	1
SHW.BC.233.2.3.1.1	627.033	600.275	583.842	1032.54	909.848	111.056	267.104	181.925	563.906	129.438	233	2
SHW.BC.233.4.8.1.1	1257.03	1335.27	609.842	1455.87	919.848	681.056	-4.56237	223.925	-41.0939	9.43837	233	2
SHW.BC.144.12.1.3.1	1113.42	1147.55	621.368	931.499	856.455	6.28947	15.4554	62.957	23.1671	69.6	144	1
SHW.BC.212.1.8.1.1	604.512	1165.32	627.153	766.021	802.869	-17.2607	85.4733	37.3342	-1.34993	17.1404	212	1
SHW.BC.212.1.5.1.1	770.512	669.657	660.487	1211.02	365.369	-17.2607	85.4733	90.6675	158.65	17.1404	212	1
SHW.BC.233.4.5.1.1	1070.37	1335.27	666.509	1665.87	387.848	251.056	-4.56237	350.591	-41.0939	9.43837	233	2
SHW.BC.144.11.1.3.1	887.054	537.181	667.335	991.656	867.654	52.2655	5.11364	95.6813	62.4221	66.1001	144	1
SHW.BC.233.3.8.1.1	1146.2	904.726	693.842	1665.87	809.515	211.056	233.168	227.925	308.906	149.438	233	2
SHW.BC.233.9.8.1.1	1168.7	1013.27	698.176	1611.87	417.848	-48.944	259.438	153.925	288.906	9.43837	233	2
SHW.BC.212.2.2.2.1	840.93	670.486	712.061	1080.23	549.142	422.643	168.443	300.87	742.434	79.9207	212	1
SHW.BC.212.3.5.2.1	778.59	951.513	714.979	947.987	1212.91	80.0935	39.3671	146.449	131.281	95.331	212	1
SHW.BC.212.2.6.1.1	1171.92	1363.51	722.979	1603.99	988.909	327.593	274.367	230.449	741.281	95.331	212	1
SHW.BC.233.4.1.1.1	236.199	1899.73	729.842	1665.87	1673.56	-48.944	-81.8323	153.925	308.906	9.43837	233	2
SHW.BC.212.11.3.2.1	847.522	941.393	755.776	950.571	519.515	408.712	536.501	74.045	829.123	96.105	212	1
SHW.BC.144.11.1.2.1	762.587	444.215	756.368	817.499	1439.12	371.289	108.789	116.29	553.167	229.6	144	1
SHW.BC.212.1.2.1.1	1099.51	1115.66	760.82	1289.02	1091.2	-17.2607	85.4733	133.334	326.65	17.1404	212	1
SHW.BC.144.15.1.3.1	1252.01	780.324	761.677	1304.35	516.202	-17.2607	85.4733	37.3342	551.983	17.1404	144	1
SHW.BC.233.4.2.1.1	1082.03	1685.06	776.509	1608.37	1349.51	281.056	-81.8323	153.925	308.906	546.105	233	2
SHW.BC.212.1.2.2.1	967.012	923.657	785.487	1234.35	751.202	-17.2607	85.4733	37.3342	358.65	17.1404	212	1
SHW.BC.212.2.4.2.1	977.845	578.657	788.82	1253.52	356.869	342.739	85.4733	237.334	303.65	77.1404	212	1
SHW.BC.233.2.7.1.1	1261.7	1252.77	789.842	1575.87	1232.85	-48.944	-4.56237	153.925	75.5727	9.43837	233	2
SHW.BC.144.15.1.8.1	1096.18	708.657	790.82	999.354	720.869	237.739	85.4733	37.3342	390.317	17.1404	144	1
SHW.BC.212.10.8.2.1	539.683	685.706	797.472	425.582	639.187	75.6914	1.20584	115.818	77.7338	70.1071	212	1
SHW.BC.212.1.6.1.1	652.512	603.657	800.82	591.021	549.535	46.7393	85.4733	169.334	158.65	17.1404	212	1
SHW.BC.212.3.8.2.1	1041.92	1368.51	818.979	1317.99	888.909	260.093	39.3671	146.449	549.281	95.331	212	1
SHW.BC.233.2.5.1.1	1196.07	1005.05	829.572	1374.58	868.594	881.571	430.503	488.165	1497.74	262.006	233	2
SHW.BC.144.8.1.3.1	907.48	890.41	833.449	1003.1	724.869	416.901	160.165	305.543	581.936	164.681	144	1
SHW.BC.212.1.7.1.1	917.845	1008.66	833.82	1049.35	789.535	-17.2607	85.4733	37.3342	-1.34993	17.1404	212	1
SHW.BC.212.3.6.2.1	846.846	961.414	837.974	835.646	770.698	96.8943	20.39	137.427	116.848	79.0127	212	1
SHW.BC.144.8.1.8.1	1033.52	1299.27	853.276	1117.54	604.515	-5.28834	345.438	74.045	953.906	9.43837	144	1
SHW.BC.233.2.8.1.1	1180.37	1275.27	853.842	1665.87	762.848	27.7227	-4.56237	153.925	-41.0939	9.43837	233	2
SHW.BC.233.2.2.1.1	1257.7	1295.27	888.176	1270.15	1254.51	23.056	112.104	153.925	556.049	9.43837	233	2
SHW.BC.233.14.1.1.1	1313.7	555.275	899.842	1195.87	1202.85	-48.944	205.438	173.925	220.335	9.43837	233	2
SHW.BC.144.11.1.1.1	965.921	694.215	904.701	988.499	1024.79	357.289	168.789	222.957	508.167	296.267	144	1
SHW.BC.144.9.1.3.1	1240.69	NA	911.029	888.661	777.806	-103.209	NA	-346.213	-156.4	-171.425	144	1
SHW.BC.144.9.1.5.1	877.654	827.706	911.546	1079.95	675.996	83.7644	1.20584	102.128	211.337	13.508	144	1
SHW.BC.233.2.6.1.1	1293.7	1335.27	917.842	1665.87	715.848	-48.944	-4.56237	153.925	98.9061	9.43837	233	2
SHW.BC.212.2.6.2.1	1075.92	1488.51	918.312	1453.99	1530.41	324.093	249.367	146.449	645.781	305.331	212	1
SHW.BC.212.2.7.2.1	1249.42	1411.51	926.979	1593.99	1475.41	80.0935	39.3671	146.449	559.281	95.331	212	1
SHW.BC.212.3.3.2.1	919.854	508.414	930.141	497.903	645.124	96.8455	20.39	137.427	116.65	78.9527	212	1
SHW.BC.233.15.1.1.1	1258.7	1043.27	941.842	1363.01	655.348	218.556	99.4376	153.925	301.763	9.43837	233	2
SHW.BC.212.2.4.1.1	944.512	605.324	942.82	1039.02	462.869	352.739	85.4733	157.334	490.65	17.1404	212	1
SHW.BC.233.6.8.1.1	39.6994	1175.27	943.842	1182.54	1045.85	-48.944	325.438	257.925	308.906	9.43837	233	2
SHW.BC.212.2.2.1.1	1141.18	778.833	951.32	1292.6	567.869	442.739	189.03	147.334	581.674	117.14	212	1
SHW.BC.144.15.1.7.1	1200.51	795.657	952.153	1023.52	590.369	-17.2607	85.4733	107.334	743.65	17.1404	144	1
SHW.BC.233.5.6.1.1	1088.7	1317.27	954.842	1593.87	763.848	-48.944	43.4376	153.925	-41.0939	9.43837	233	2
SHW.BC.144.8.1.1.1	955.522	905.06	958.276	1038.07	823.848	120.712	108.168	199.045	526.623	9.43837	144	1
SHW.BC.233.3.6.1.1	361.199	943.06	969.842	1602.54	491.182	-8.94397	164.834	313.925	133.906	87.7717	233	2
SHW.BC.212.12.8.2.1	1253.02	1235.71	977.472	907.249	585.187	525.691	345.206	397.818	559.4	112.107	212	1
SHW.BC.233.8.3.1.1	1495.7	1203.61	978.176	733.869	1196.18	-48.944	-4.56237	153.925	168.906	9.43837	233	2
SHW.BC.144.10.1.7.1	1010.61	831.672	978.294	1126.54	901.495	247.204	200.081	269.91	618.916	223.196	144	1
SHW.BC.233.11.1.1.1	1311.2	1245.27	982.342	1635.87	987.848	546.056	-4.56237	303.925	966.406	9.43837	233	2
SHW.BC.144.14.1.3.1	1223.92	930.882	991.368	1375.5	1603.12	-8.71053	8.78871	149.624	23.1671	69.6	144	1
SHW.BC.233.9.5.1.1	863.699	1293.27	1021.84	1617.87	805.848	-48.944	135.438	153.925	-41.0939	9.43837	233	2
SHW.BC.233.6.6.1.1	985.699	1227.27	1035.84	1665.87	652.848	123.056	315.438	423.925	206.406	9.43837	233	2
SHW.BC.144.14.1.6.1	1010.92	1015.88	1051.37	870.999	1527.12	-8.71053	8.78871	62.957	23.1671	69.6	144	1
SHW.BC.144.9.1.4.1	1294.02	NA	1052.03	1247.52	589.472	100.124	NA	332.453	126.743	-171.425	144	1
SHW.BC.233.7.7.1.1	1705.7	1300.27	1052.34	1487.54	1047.85	-48.944	92.1043	376.425	257.239	9.43837	233	2
SHW.BC.233.5.7.1.1	1235.37	1275.27	1069.84	1569.87	359.848	-48.944	182.104	153.925	140.906	9.43837	233	2
SHW.BC.233.7.2.1.1	1113.7	1261.27	1074.84	1665.87	557.848	413.556	-4.56237	413.925	288.906	9.43837	233	2
SHW.BC.212.1.3.1.1	939.522	913.06	1084.94	1075.57	491.848	-5.28834	-81.8323	-45.955	316.623	9.43837	212	1
SHW.BC.144.11.1.7.1	1260.92	1286.36	1106.17	1196.74	985.232	35.6915	24.1312	104.703	77.2238	82.4184	144	1
SHW.BC.212.1.7.2.1	1108.51	1373.66	1110.49	1134.35	1086.2	-17.2607	85.4733	37.3342	-1.34993	17.1404	212	1
SHW.BC.144.14.1.1.1	945.921	976.882	1117.37	971.499	1211.12	151.289	8.78871	62.957	23.1671	69.6	144	1
SHW.BC.233.9.2.1.1	733.699	1286.94	1149.84	1665.87	1464.51	-48.944	-4.56237	153.925	-41.0939	9.43837	233	2
SHW.BC.144.2.1.2.1	1283.52	1335.27	1151.13	1130.87	830.705	-5.28834	65.4376	-45.955	673.906	9.43837	144	1
SHW.BC.233.3.2.1.1	1130.53	1094.72	1151.55	1218.31	910.735	32.9156	-1.56434	149.479	146.972	35.909	233	2
SHW.BC.144.8.1.2.1	1235.69	NA	1198.7	1027.23	589.472	638.457	NA	299.12	222.171	-19.7579	144	1
SHW.BC.233.6.7.1.1	575.699	1031.27	1209.84	1628.37	530.348	-48.944	79.4376	595.925	261.406	9.43837	233	2
Robigus	1210.31	1142.29	1213.84	1371.05	1119.39	398.615	202.628	367.793	670.444	113.926	0	0
SHW.BC.212.1.6.2.1	1456.51	713.657	1214.82	1334.35	1249.54	150.739	85.4733	37.3342	-1.34993	17.1404	212	1
SHW.BC.233.4.3.1.1	1488.7	1329.73	1225.84	1561.87	169.848	1396.06	343.168	959.925	338.906	9.43837	233	2
SHW.BC.144.14.1.8.1	1303.52	1331.06	1230.78	1159.57	1113.85	-5.28834	108.168	441.545	36.6229	9.43837	144	1
SHW.BC.144.8.1.4.1	1224.02	NA	1235.36	1154.85	1036.14	820.124	NA	769.12	824.076	528.575	144	1
SHW.BC.144.9.1.2.1	1074.02	NA	1238.7	1268.18	1115.31	-109.876	NA	354.12	155.743	-171.425	144	1
SHW.BC.212.3.8.1.1	1569.42	1461.51	1252.98	1590.65	1202.91	360.093	39.3671	146.449	551.281	95.331	212	1
SHW.BC.144.15.1.1.1	1416.63	999.677	1272.08	1345.17	1298.6	197.922	43.5414	83.0711	392.403	39.7741	144	1
SHW.BC.233.10.2.1.1	287.699	863.275	1274.84	1381.87	1694.51	-48.944	463.438	870.591	364.906	9.43837	233	2
SHW.BC.144.10.1.4.1	1588.02	NA	1278.46	1364.85	1476.14	338.124	NA	885.787	857.409	398.575	144	1
SHW.BC.233.7.1.1.1	1055.37	935.275	1283.84	1635.87	1305.35	396.056	497.104	773.925	1190.91	129.438	233	2
SHW.BC.233.5.8.1.1	1643.7	1335.27	1301.84	1650.87	531.182	-48.944	-4.56237	153.925	502.239	9.43837	233	2
SHW.BC.233.5.1.1.1	1297.03	1257.27	1307.34	1575.87	851.182	351.056	121.438	493.925	218.906	9.43837	233	2
SHW.BC.233.10.6.1.1	1525.7	1325.27	1311.84	1665.87	1180.71	571.056	-4.56237	941.925	192.239	9.43837	233	2
SHW.BC.144.9.1.7.1	1285.69	NA	1330.36	1551.52	1242.81	346.791	NA	620.787	855.743	118.575	144	1
SHW.BC.212.1.5.2.1	1328.98	1224.44	1334.89	1426.23	1198.12	124.835	107.232	257.036	332.804	155.356	212	1
SHW.BC.144.10.1.3.1	1246.24	893.314	1354.03	1299.64	1436.07	601.861	127.413	587.838	668.147	403.575	144	1
SHW.BC.233.9.6.1.1	1058.7	1247.27	1355.84	1665.87	1064.99	277.723	295.438	209.925	138.906	9.43837	233	2
SHW.BC.144.16.1.2.1	1254.51	738.657	1356.82	1165.02	1094.54	-17.2607	85.4733	121.334	282.65	17.1404	144	1
SHW.BC.212.11.3.1.1	1486.35	1073.71	1380.8	1372.25	689.187	589.025	221.206	410.818	1036.07	70.1071	212	1
SHW.BC.233.6.3.1.1	1448.7	1335.27	1397.84	1665.87	1009.85	-48.944	-4.56237	153.925	-41.0939	9.43837	233	2
SHW.BC.144.4.1.4.1	1280.71	795.318	1418.34	1163.95	1076.42	403.171	146.792	646.836	321.958	173.335	144	1
SHW.BC.144.14.1.5.1	1108.42	910.882	1421.37	710.999	1131.12	-8.71053	18.7887	242.957	23.1671	69.6	144	1
SHW.BC.233.9.7.1.1	936.199	1046.94	1459.84	1665.87	857.848	-48.944	257.104	153.925	258.906	9.43837	233	2
SHW.BC.144.15.1.5.1	1374.51	996.991	1466.82	1402.69	1104.87	-17.2607	85.4733	37.3342	325.317	17.1404	144	1
SHW.BC.233.9.4.1.1	1247.7	1320.27	1471.84	1665.87	1087.85	161.056	-4.56237	153.925	-41.0939	9.43837	233	2
SHW.BC.144.15.1.6.1	1404.51	1028.66	1473.82	1497.02	986.869	87.7393	85.4733	37.3342	402.65	17.1404	144	1
SHW.BC.233.5.3.1.1	1156.2	1225.27	1475.84	1255.87	596.42	331.056	320.438	153.925	658.906	9.43837	233	2
KWS Cashel	1671.99	1525.25	1482.09	1567.79	1500.57	1019.65	738.558	918.075	1065.21	861.277	0	0
SHW.BC.233.6.5.1.1	1447.74	1258.29	1490.57	1434.22	1452.66	32.3268	-1.57476	141.165	29.8396	35.839	233	2
SHW.BC.233.5.4.1.1	991.699	1155.27	1503.84	1605.87	712.848	-48.944	263.771	153.925	258.906	9.43837	233	2
SHW.BC.144.10.1.6.1	1212.79	1317.75	1513.71	1143.03	1242.86	176.68	557.459	1036.7	459.614	277.103	144	1
SHW.BC.144.10.1.1.1	1439.02	NA	1534.53	1452.95	1431.14	250.124	NA	768.287	652.171	670.242	144	1
SHW.BC.233.9.3.1.1	1291.7	1305.27	1541.84	1635.87	1146.18	251.056	212.104	153.925	498.906	9.43837	233	2
SHW.BC.212.10.7.1.1	988.016	1170.71	1542.47	1105.58	320.853	590.691	264.539	382.485	904.4	105.107	212	1
SHW.BC.144.15.1.4.1	1675.62	1431.99	1550.49	1635.02	1637.87	382.739	85.4733	37.3342	708.65	92.1404	144	1
SHW.BC.233.6.4.1.1	1377.03	1173.61	1554.84	1323.01	937.848	31.056	175.438	153.925	396.049	9.43837	233	2
SHW.BC.233.4.6.1.1	1464.41	1298.38	1584.57	1395.19	1508.43	968.16	298.339	1191.17	1091.64	419.34	233	2
SHW.BC.144.14.1.7.1	1683.92	1647.55	1586.37	1441.5	1209.79	-8.71053	8.78871	62.957	23.1671	329.6	144	1
SHW.BC.233.10.7.1.1	1631.7	1305.27	1644.84	1653.87	1645.85	437.056	89.4376	281.425	210.906	9.43837	233	2
SHW.BC.233.12.1.1.1	757.033	1287.27	1647.34	1665.87	655.348	167.723	-4.56237	153.925	-41.0939	9.43837	233	2
SHW.BC.233.10.3.1.1	1787.57	1082.29	1649.13	1693.65	1649.48	363.769	488.425	459.072	312.562	35.7642	233	2
SHW.BC.233.10.4.1.1	1583.7	960.275	1649.84	1658.37	1550.35	191.056	65.4376	173.925	-41.0939	9.43837	233	2
SHW.BC.233.3.7.1.1	1399.7	1143.06	1659.84	1665.87	777.848	377.056	610.668	237.925	-41.0939	129.438	233	2
SHW.BC.233.3.4.1.1	1623.7	1335.27	1662.34	1611.87	885.848	371.056	-4.56237	153.925	80.9061	165.438	233	2
SHW.BC.233.10.8.1.1	1760.59	1277.74	1688.61	1650.25	1602.59	32.9156	-1.58175	140.623	113.975	36.0064	233	2
SHW.BC.233.3.5.1.1	1583.7	1335.27	1704.84	1605.87	507.848	-48.944	295.438	153.925	625.573	9.43837	233	2
SHW.BC.233.5.2.1.1	1168.7	1183.27	1784.84	1381.87	937.848	111.056	283.438	153.925	332.906	9.43837	233	2
SHW.BC.233.5.5.1.1	1169.7	1335.27	1897.84	1665.87	616.182	-48.944	243.438	153.925	-41.0939	9.43837	233	2
SHW.BC.144.6.1.4.1	NA	1335.27	NA	218.369	NA	NA	-4.56237	NA	-41.0939	NA	144	1

## Sheet: Supplementary Table S4
Supplementary Table S4. Gene content of the qSTB-3D.1 interval based on the IWGSC RefSeq v.1.1 wheat genome annotation.
RefSeq v1.1 GeneID	Gene Name	Chromosome	Start Position	End Position	Interpro ID	Interpro Description	Gene Type
TraesCS3D02G500800	Stb16q	3D	590040443	590044267	IPR000719;IPR001245;IPR002902;IPR008271;IPR011009;IPR038408	Protein kinase domain;Serine-threonine/tyrosine-protein kinase, catalytic domain;Gnk2-homologous domain;Serine/threonine-protein kinase, active site;Protein kinase-like domain superfamily;Gnk2-homologous domain superfamily	CRK
TraesCS3D02G494400	NA	3D	587094716	587097358	IPR036188	FAD/NAD(P)-binding domain superfamily	Other/Unknown
TraesCS3D02G494500	NA	3D	587098299	587100416	IPR011032;IPR013154;IPR020843;IPR036291;IPR052733	GroES-like superfamily;Alcohol dehydrogenase-like, N-terminal;Polyketide synthase, enoylreductase domain;NAD(P)-binding domain superfamily;Chloroplast-localized Quinone Oxidoreductase	Other/Unknown
TraesCS3D02G494600	NA	3D	587200633	587204237	IPR001789;IPR011006;IPR045279	Signal transduction response regulator, receiver domain;CheY-like superfamily;Two-component response regulator ARR-like	Other/Unknown
TraesCS3D02G494700	NA	3D	587378548	587379900	IPR004314;IPR053168	Neprosin;Glutamic endopeptidase	Other/Unknown
TraesCS3D02G494800	NA	3D	587419499	587419855	NA	NA	Other/Unknown
TraesCS3D02G494900	NA	3D	587420922	587421488	IPR006461	PLAC8 motif-containing protein	Other/Unknown
TraesCS3D02G495000	NA	3D	587433577	587442111	IPR006101;IPR006102;IPR006103;IPR006104;IPR008979;IPR013783;IPR017853;IPR023230;IPR023232;IPR032312;IPR036156;IPR050347;IPR004199;IPR011013;IPR014718	Glycoside hydrolase, family 2;Glycoside hydrolase, family 2, immunoglobulin-like beta-sandwich;Glycoside hydrolase family 2, catalytic domain;Glycosyl hydrolases family 2, sugar binding domain;Galactose-binding-like domain superfamily;Immunoglobulin-like fold;Glycoside hydrolase superfamily;Glycoside hydrolase, family 2, conserved site;Glycoside hydrolase, family 2, active site;Beta-galactosidase…	Other/Unknown
TraesCS3D02G495100	NA	3D	587442470	587447825	IPR011059;IPR013108;IPR032466;IPR033932	Metal-dependent hydrolase, composite domain superfamily;Amidohydrolase 3;Metal-dependent hydrolase;YtcJ like	Other/Unknown
TraesCS3D02G495200	NA	3D	587534444	587535412	IPR025322	PADRE domain	Other/Unknown
TraesCS3D02G495300	NA	3D	587584805	587586681	IPR011598;IPR015660;IPR036638	Myc-type, basic helix-loop-helix (bHLH) domain;Achaete-scute transcription factor-related;Helix-loop-helix DNA-binding domain superfamily	Other/Unknown
TraesCS3D02G495400	NA	3D	587593660	587596608	IPR011598;IPR015660;IPR036638	Myc-type, basic helix-loop-helix (bHLH) domain;Achaete-scute transcription factor-related;Helix-loop-helix DNA-binding domain superfamily	Other/Unknown
TraesCS3D02G495500	NA	3D	587608156	587609671	IPR001841;IPR013083;IPR053238	Zinc finger, RING-type;Zinc finger, RING/FYVE/PHD-type;RING-H2 finger domain-containing protein	Other/Unknown
TraesCS3D02G495600	NA	3D	587644739	587648644	IPR011598;IPR015660;IPR036638	Myc-type, basic helix-loop-helix (bHLH) domain;Achaete-scute transcription factor-related;Helix-loop-helix DNA-binding domain superfamily	Other/Unknown
TraesCS3D02G495700	NA	3D	587745410	587748716	IPR011598;IPR015660;IPR036638	Myc-type, basic helix-loop-helix (bHLH) domain;Achaete-scute transcription factor-related;Helix-loop-helix DNA-binding domain superfamily	Other/Unknown
TraesCS3D02G495800	NA	3D	587751008	587752228	IPR035892	C2 domain superfamily	Other/Unknown
TraesCS3D02G495900	NA	3D	587904067	587906106	IPR001806;IPR005225;IPR027417;IPR050209	Small GTPase;Small GTP-binding protein domain;P-loop containing nucleoside triphosphate hydrolase;Rab GTPases family involved in membrane trafficking	Other/Unknown
TraesCS3D02G496000	NA	3D	587906640	587908096	NA	NA	Other/Unknown
TraesCS3D02G496100	NA	3D	587946642	587950485	IPR000719;IPR001245;IPR001611;IPR003591;IPR008271;IPR011009;IPR017441;IPR032675;IPR045381;IPR050647;IPR055414	Protein kinase domain;Serine-threonine/tyrosine-protein kinase, catalytic domain;Leucine-rich repeat;Leucine-rich repeat, typical subtype;Serine/threonine-protein kinase, active site;Protein kinase-like domain superfamily;Protein kinase, ATP binding site;Leucine-rich repeat domain superfamily;Brassinosteroid receptor BRI1, island domain;Plant LRR receptor-like serine/threonine-protein kinases;Dis…	LRR-RLK
TraesCS3D02G496200	NA	3D	588026120	588028776	IPR005025;IPR029039;IPR050712	NADPH-dependent FMN reductase-like domain;Flavoprotein-like superfamily;NAD(P)H-dependent reductase	Other/Unknown
TraesCS3D02G496300	NA	3D	588078382	588079289	IPR005025;IPR029039;IPR050712	NADPH-dependent FMN reductase-like domain;Flavoprotein-like superfamily;NAD(P)H-dependent reductase	Other/Unknown
TraesCS3D02G496400	NA	3D	588109400	588110049	IPR005025;IPR029039;IPR050712	NADPH-dependent FMN reductase-like domain;Flavoprotein-like superfamily;NAD(P)H-dependent reductase	Other/Unknown
TraesCS3D02G496500	NA	3D	588121466	588124491	IPR036537;IPR054000	Adaptor protein Cbl, N-terminal domain superfamily;Mixed lineage kinase domain-like, N-terminal domain	Other/Unknown
TraesCS3D02G496600	NA	3D	588155317	588156256	IPR005025;IPR029039;IPR050712	NADPH-dependent FMN reductase-like domain;Flavoprotein-like superfamily;NAD(P)H-dependent reductase	Other/Unknown
TraesCS3D02G496700	NA	3D	588198801	588199703	IPR005175;IPR014476	PPC domain;AT-hook motif nuclear-localized protein 15-29	Other/Unknown
TraesCS3D02G496800	NA	3D	588314520	588316505	IPR005025;IPR029039;IPR050712	NADPH-dependent FMN reductase-like domain;Flavoprotein-like superfamily;NAD(P)H-dependent reductase	Other/Unknown
TraesCS3D02G496900	NA	3D	588317853	588319748	IPR001971;IPR036967	Ribosomal protein S11;Small ribosomal subunit protein uS11 superfamily	Other/Unknown
TraesCS3D02G497000	NA	3D	588333218	588334649	IPR039307	GPI-anchored protein LORELEI-like	Other/Unknown
TraesCS3D02G497100	NA	3D	588338766	588344915	IPR039307	GPI-anchored protein LORELEI-like	Other/Unknown
TraesCS3D02G497200	NA	3D	588393624	588396164	IPR001841;IPR013083;IPR017907	Zinc finger, RING-type;Zinc finger, RING/FYVE/PHD-type;Zinc finger, RING-type, conserved site	Other/Unknown
TraesCS3D02G497300	NA	3D	588484721	588489721	IPR006510;IPR006511;IPR007818	Zinc finger, lateral root primordium type 1;SHORT INTERNODES, C-terminal;SHI protein family	Other/Unknown
TraesCS3D02G497400	NA	3D	588694910	588696728	IPR002672;IPR029004	Large ribosomal subunit protein eL28;Ribosomal eL28/Mak16	Other/Unknown
TraesCS3D02G497500	NA	3D	588724298	588729959	IPR009071;IPR031061;IPR036910	High mobility group box domain;High mobility group protein HMGB, plant;High mobility group box domain superfamily	Other/Unknown
TraesCS3D02G497600	NA	3D	588781821	588788092	NA	NA	Other/Unknown
TraesCS3D02G497700	NA	3D	588827751	588829367	IPR039307	GPI-anchored protein LORELEI-like	Other/Unknown
TraesCS3D02G497800	NA	3D	588833513	588835086	IPR001461;IPR021109;IPR032799;IPR032861;IPR033121	Aspartic peptidase A1 family;Aspartic peptidase domain superfamily;Xylanase inhibitor, C-terminal;Xylanase inhibitor, N-terminal;Peptidase family A1 domain	Other/Unknown
TraesCS3D02G497900	NA	3D	588993482	588994620	IPR039307	GPI-anchored protein LORELEI-like	Other/Unknown
TraesCS3D02G498000	NA	3D	588999142	589009043	IPR000719;IPR001245;IPR008271;IPR011009	Protein kinase domain;Serine-threonine/tyrosine-protein kinase, catalytic domain;Serine/threonine-protein kinase, active site;Protein kinase-like domain superfamily	RLK-other
TraesCS3D02G498100	NA	3D	589153761	589155120	IPR004883	Lateral organ boundaries, LOB	Other/Unknown
TraesCS3D02G498300	NA	3D	589217328	589219108	IPR001461;IPR021109;IPR032799;IPR032861;IPR033121	Aspartic peptidase A1 family;Aspartic peptidase domain superfamily;Xylanase inhibitor, C-terminal;Xylanase inhibitor, N-terminal;Peptidase family A1 domain	Other/Unknown
TraesCS3D02G498400	NA	3D	589249226	589249417	IPR002677;IPR044958	Ribosomal protein L32p;Large ribosomal subunit protein bL32, plant/cyanobacteria type	Other/Unknown
TraesCS3D02G498500	NA	3D	589252916	589253188	IPR000589;IPR005290;IPR009068	Small ribosomal subunit protein uS15;Ribosomal protein S15, bacterial-type;uS15/NS1, RNA-binding domain superfamily	Other/Unknown
TraesCS3D02G498600	NA	3D	589259202	589259402	NA	NA	Other/Unknown
TraesCS3D02G498700	NA	3D	589263672	589263977	IPR022546	Uncharacterised protein family Ycf68	Other/Unknown
TraesCS3D02G498800	NA	3D	589266455	589266709	NA	NA	Other/Unknown
TraesCS3D02G498900	NA	3D	589266768	589266944	NA	NA	Other/Unknown
TraesCS3D02G499000	NA	3D	589268782	589269099	NA	NA	Other/Unknown
TraesCS3D02G499100	NA	3D	589273073	589273283	NA	NA	Other/Unknown
TraesCS3D02G499200	NA	3D	589278164	589278304	NA	NA	Other/Unknown
TraesCS3D02G499300	NA	3D	589278894	589279055	NA	NA	Other/Unknown
TraesCS3D02G499500	NA	3D	589279901	589280398	IPR002171;IPR005880;IPR008991;IPR014722;IPR014726;IPR022669;IPR022671	Ribosomal protein L2;Ribosomal protein L2, bacterial/organellar-type;Translation protein SH3-like domain superfamily;Large ribosomal subunit protein uL2, domain 2;Large ribosomal subunit protein uL2, domain 3;Large ribosomal subunit protein uL2, C-terminal;Large ribosomal subunit protein uL2, conserved site	Other/Unknown
TraesCS3D02G499400	NA	3D	589279963	589280292	IPR038860	Uncharacterized protein ycf72	Other/Unknown
TraesCS3D02G499700	NA	3D	589417106	589417854	IPR002048;IPR011992;IPR018247;IPR039647	EF-hand domain;EF-hand domain pair;EF-Hand 1, calcium-binding site;EF-hand domain pair protein CML-like	Other/Unknown
TraesCS3D02G499800	NA	3D	589432322	589432785	IPR002048;IPR011992;IPR018247;IPR039647	EF-hand domain;EF-hand domain pair;EF-Hand 1, calcium-binding site;EF-hand domain pair protein CML-like	Other/Unknown
TraesCS3D02G499900	NA	3D	589492713	589493168	IPR002048;IPR011992;IPR018247;IPR039647	EF-hand domain;EF-hand domain pair;EF-Hand 1, calcium-binding site;EF-hand domain pair protein CML-like	Other/Unknown
TraesCS3D02G500000	NA	3D	589505519	589505977	IPR002048;IPR011992;IPR018247;IPR039647	EF-hand domain;EF-hand domain pair;EF-Hand 1, calcium-binding site;EF-hand domain pair protein CML-like	Other/Unknown
TraesCS3D02G500100	NA	3D	589572386	589572841	IPR002048;IPR011992;IPR018247;IPR039647	EF-hand domain;EF-hand domain pair;EF-Hand 1, calcium-binding site;EF-hand domain pair protein CML-like	Other/Unknown
TraesCS3D02G500200	NA	3D	589580138	589580584	IPR002048;IPR011992;IPR018247;IPR039647	EF-hand domain;EF-hand domain pair;EF-Hand 1, calcium-binding site;EF-hand domain pair protein CML-like	Other/Unknown
TraesCS3D02G500300	NA	3D	589607809	589608465	IPR002048;IPR011992;IPR018247;IPR039647	EF-hand domain;EF-hand domain pair;EF-Hand 1, calcium-binding site;EF-hand domain pair protein CML-like	Other/Unknown
TraesCS3D02G500400	NA	3D	589671870	589672370	NA	NA	Other/Unknown
TraesCS3D02G500500	NA	3D	589695872	589697427	IPR001099;IPR011141;IPR012328;IPR016039	Chalcone/stilbene synthase, N-terminal;Polyketide synthase, type III;Chalcone/stilbene synthase, C-terminal;Thiolase-like	Other/Unknown
TraesCS3D02G500600	NA	3D	589757265	589764081	IPR013936	Chloroquine-resistance transporter-like	Other/Unknown
TraesCS3D02G500700	NA	3D	589857710	589858660	NA	NA	Other/Unknown
TraesCS3D02G500900	NA	3D	590091094	590093954	IPR000719;IPR002902;IPR008271;IPR011009;IPR038408	Protein kinase domain;Gnk2-homologous domain;Serine/threonine-protein kinase, active site;Protein kinase-like domain superfamily;Gnk2-homologous domain superfamily	CRK
TraesCS3D02G501000	NA	3D	590137932	590150434	IPR000719;IPR001245;IPR002902;IPR008271;IPR011009;IPR038408	Protein kinase domain;Serine-threonine/tyrosine-protein kinase, catalytic domain;Gnk2-homologous domain;Serine/threonine-protein kinase, active site;Protein kinase-like domain superfamily;Gnk2-homologous domain superfamily	CRK
TraesCS3D02G501100	NA	3D	590199543	590205678	IPR000719;IPR001245;IPR002902;IPR011009;IPR038408;IPR008271	Protein kinase domain;Serine-threonine/tyrosine-protein kinase, catalytic domain;Gnk2-homologous domain;Protein kinase-like domain superfamily;Gnk2-homologous domain superfamily;Serine/threonine-protein kinase, active site	CRK
TraesCS3D02G501200	NA	3D	590220428	590224762	IPR000719;IPR001245;IPR002902;IPR011009;IPR038408;IPR008271	Protein kinase domain;Serine-threonine/tyrosine-protein kinase, catalytic domain;Gnk2-homologous domain;Protein kinase-like domain superfamily;Gnk2-homologous domain superfamily;Serine/threonine-protein kinase, active site	CRK
TraesCS3D02G501300	NA	3D	590237247	590241366	IPR002902;IPR038408;IPR011009	Gnk2-homologous domain;Gnk2-homologous domain superfamily;Protein kinase-like domain superfamily	CRK
TraesCS3D02G501400	NA	3D	590305938	590309917	IPR000719;IPR001245;IPR002902;IPR008271;IPR011009;IPR038408	Protein kinase domain;Serine-threonine/tyrosine-protein kinase, catalytic domain;Gnk2-homologous domain;Serine/threonine-protein kinase, active site;Protein kinase-like domain superfamily;Gnk2-homologous domain superfamily	CRK
TraesCS3D02G501500	NA	3D	590330002	590331825	IPR004158	Protein of unknown function DUF247, plant	Other/Unknown
TraesCS3D02G501600	NA	3D	590355357	590357189	IPR004158	Protein of unknown function DUF247, plant	Other/Unknown
TraesCS3D02G501700	NA	3D	590367369	590369188	IPR004158	Protein of unknown function DUF247, plant	Other/Unknown
TraesCS3D02G501800	NA	3D	590438738	590440503	IPR000225;IPR011989;IPR016024	Armadillo;Armadillo-like helical;Armadillo-type fold	Other/Unknown
TraesCS3D02G501900	NA	3D	590524316	590525827	IPR007657;IPR049625	Glycosyltransferase 61;Glycosyltransferase 61, catalytic domain	Other/Unknown
TraesCS3D02G499600	NPC2-3D	3D	589374117	589378796	IPR007312;IPR017850	Phosphoesterase;Alkaline-phosphatase-like, core domain superfamily	Other/Unknown
TraesCS3D02G502000	NA	3D	590676313	590678113	IPR007657;IPR049625	Glycosyltransferase 61;Glycosyltransferase 61, catalytic domain	Other/Unknown
TraesCS3D02G502100	NA	3D	590703195	590704159	NA	NA	Other/Unknown
TraesCS3D02G502200	NA	3D	590754573	590764017	IPR002182;IPR027417	NB-ARC;P-loop containing nucleoside triphosphate hydrolase	Other/Unknown
TraesCS3D02G502300	NA	3D	590829305	590830164	NA	NA	Other/Unknown
TraesCS3D02G502400	NA	3D	590835142	590840973	IPR002182;IPR027417;IPR032675;IPR036388;IPR042197;IPR050905;IPR055414	NB-ARC;P-loop containing nucleoside triphosphate hydrolase;Leucine-rich repeat domain superfamily;Winged helix-like DNA-binding domain superfamily;Apoptotic protease-activating factors, helical domain;Plant disease resistance NBS-LRR;Disease resistance R13L4/SHOC-2-like, LRR domain	NB-LRR
TraesCS3D02G502500	NA	3D	590935693	590942224	IPR002504;IPR016064;IPR017437;IPR017438	NAD kinase;NAD kinase/diacylglycerol kinase-like domain superfamily;ATP-NAD kinase, PpnK-type, C-terminal;Inorganic polyphosphate/ATP-NAD kinase, N-terminal	Other/Unknown
TraesCS3D02G502600	NA	3D	590942729	590946600	IPR000719;IPR001611;IPR003591;IPR011009;IPR013210;IPR032675;IPR050647;IPR055414	Protein kinase domain;Leucine-rich repeat;Leucine-rich repeat, typical subtype;Protein kinase-like domain superfamily;Leucine-rich repeat-containing N-terminal, plant-type;Leucine-rich repeat domain superfamily;Plant LRR receptor-like serine/threonine-protein kinases;Disease resistance R13L4/SHOC-2-like, LRR domain	LRR-RLK
TraesCS3D02G502700	NA	3D	590942861	590946495	NA	NA	Other/Unknown
TraesCS3D02G502800	NA	3D	591092930	591095804	IPR002182;IPR003593;IPR027417;IPR032675;IPR042197;IPR050905;IPR055414	NB-ARC;AAA+ ATPase domain;P-loop containing nucleoside triphosphate hydrolase;Leucine-rich repeat domain superfamily;Apoptotic protease-activating factors, helical domain;Plant disease resistance NBS-LRR;Disease resistance R13L4/SHOC-2-like, LRR domain	NB-LRR
TraesCS3D02G502900	NA	3D	591103173	591103403	NA	NA	Other/Unknown
TraesCS3D02G503100	NA	3D	591184902	591202487	IPR036537;IPR054000	Adaptor protein Cbl, N-terminal domain superfamily;Mixed lineage kinase domain-like, N-terminal domain	Other/Unknown
TraesCS3D02G503200	NA	3D	591239544	591242115	IPR006439;IPR023198;IPR023214;IPR036412;IPR045228	HAD hydrolase, subfamily IA;Phosphoglycolate phosphatase-like, domain 2;HAD superfamily;HAD-like superfamily;Phosphatase Gpp1/Gpp2-like	Other/Unknown
TraesCS3D02G503300	NA	3D	591253012	591254259	IPR001810;IPR036047	F-box domain;F-box-like domain superfamily	Other/Unknown
TraesCS3D02G503400	NA	3D	591391825	591393915	IPR004158	Protein of unknown function DUF247, plant	Other/Unknown
TraesCS3D02G503500	NA	3D	591396955	591398407	IPR004158	Protein of unknown function DUF247, plant	Other/Unknown
TraesCS3D02G503600	NA	3D	591542136	591543156	IPR004146;IPR046349	DC1;C1-like domain superfamily	Other/Unknown
TraesCS3D02G503700	NA	3D	591548091	591549182	IPR046349	C1-like domain superfamily	Other/Unknown
TraesCS3D02G503800	NA	3D	591616263	591617667	IPR007064;IPR039768;IPR048898	Nmd3, N-terminal;Ribosomal export protein Nmd3;60S ribosomal export protein NMD3, OB-fold domain	Other/Unknown
TraesCS3D02G503900	NA	3D	591624629	591625564	IPR011042;IPR018119	Six-bladed beta-propeller, TolB-like;Strictosidine synthase, conserved region	Other/Unknown
TraesCS3D02G504000	NA	3D	591653654	591654892	IPR011042;IPR018119	Six-bladed beta-propeller, TolB-like;Strictosidine synthase, conserved region	Other/Unknown
TraesCS3D02G504100	NA	3D	591662885	591664127	IPR005174	KIB1-4, beta-propeller	Other/Unknown
TraesCS3D02G504200	NA	3D	591820578	591827330	IPR001173;IPR029044	Glycosyltransferase 2-like;Nucleotide-diphospho-sugar transferases	Other/Unknown
TraesCS3D02G504300	NA	3D	591862167	591880546	IPR021418;IPR021726;IPR032302;IPR040007	THO complex, subunitTHOC2, C-terminal;THO complex, subunitTHOC2, N-terminal;THO complex subunit 2, N-terminal domain;THO complex subunit 2	Other/Unknown
TraesCS3D02G504400	NA	3D	591973912	591975034	IPR003340;IPR015300;IPR039218	B3 DNA binding domain;DNA-binding pseudobarrel domain superfamily;REM family	Other/Unknown
TraesCS3D02G504500	NA	3D	591985714	591986810	IPR003653;IPR038765	Ulp1 protease family, C-terminal catalytic domain;Papain-like cysteine peptidase superfamily	Other/Unknown
TraesCS3D02G504600	NA	3D	591999721	592000062	NA	NA	Other/Unknown
TraesCS3D02G504700	NA	3D	592241197	592242407	IPR005174	KIB1-4, beta-propeller	Other/Unknown
TraesCS3D02G504800	NA	3D	592321477	592322700	IPR005174	KIB1-4, beta-propeller	Other/Unknown
TraesCS3D02G504900	NA	3D	592523632	592525074	IPR013010;IPR013083;IPR049548;IPR052088	Zinc finger, SIAH-type;Zinc finger, RING/FYVE/PHD-type;E3 ubiquitin-protein ligase Sina-like, RING finger;E3 ubiquitin-protein ligase SINA	Other/Unknown
TraesCS3D02G505000	NA	3D	592575920	592577541	IPR006734	PLATZ transcription factor	Other/Unknown
TraesCS3D02G505100	NA	3D	592593908	592594471	IPR001128;IPR002401;IPR036396;IPR052306	Cytochrome P450;Cytochrome P450, E-class, group I;Cytochrome P450 superfamily;Cytochrome P450 71D	Other/Unknown
TraesCS3D02G505200	NA	3D	592608017	592609175	IPR006734	PLATZ transcription factor	Other/Unknown
TraesCS3D02G505300	NA	3D	592760959	592762087	IPR013087;IPR036236;IPR044246	Zinc finger C2H2-type;Zinc finger C2H2 superfamily;Zinc finger protein 3-like	Other/Unknown
TraesCS3D02G505400	NA	3D	592902915	592904372	NA	NA	Other/Unknown
TraesCS3D02G505500	NA	3D	592902927	592904558	IPR002921;IPR029058	Fungal lipase-type domain;Alpha/Beta hydrolase fold	Other/Unknown
TraesCS3D02G505600	NA	3D	592972008	592973822	IPR001128;IPR002401;IPR017972;IPR036396	Cytochrome P450;Cytochrome P450, E-class, group I;Cytochrome P450, conserved site;Cytochrome P450 superfamily	Other/Unknown
TraesCS3D02G505700	NA	3D	593078334	593079749	IPR001480;IPR003609;IPR036426;IPR051343	Bulb-type lectin domain;PAN/Apple domain;Bulb-type lectin domain superfamily;G-type lectin S-receptor-like kinases and EP1-like glycoproteins	Other/Unknown
TraesCS3D02G505800	NA	3D	593084143	593088311	IPR001890;IPR035920;IPR040286	RNA-binding, CRM domain;YhbY-like superfamily;CRM domain-containing protein At3g25440-like	Other/Unknown
TraesCS3D02G505900	NA	3D	593111824	593118374	IPR000504;IPR012677;IPR035979	RNA recognition motif domain;Nucleotide-binding alpha-beta plait domain superfamily;RNA-binding domain superfamily	Other/Unknown
TraesCS3D02G506000	NA	3D	593121192	593123768	IPR045056	Nucleolar protein Nop56/Nop58	Other/Unknown
TraesCS3D02G506100	NA	3D	593214242	593218444	IPR002528;IPR045069	Multi antimicrobial extrusion protein;Multidrug and toxic compound extrusion family, eukaryotic	Other/Unknown
TraesCS3D02G506200	NA	3D	593220898	593226833	IPR002528;IPR045069	Multi antimicrobial extrusion protein;Multidrug and toxic compound extrusion family, eukaryotic	Other/Unknown
TraesCS3D02G506300	NA	3D	593235701	593238423	IPR000490;IPR012946;IPR017853;IPR044965	Glycoside hydrolase family 17;X8 domain;Glycoside hydrolase superfamily;Glycoside hydrolase family 17, plant	Other/Unknown
TraesCS3D02G506400	NA	3D	593244355	593246079	IPR001480;IPR003609;IPR036426;IPR051343	Bulb-type lectin domain;PAN/Apple domain;Bulb-type lectin domain superfamily;G-type lectin S-receptor-like kinases and EP1-like glycoproteins	Other/Unknown
TraesCS3D02G506500	NA	3D	593334421	593344791	IPR002528;IPR045069	Multi antimicrobial extrusion protein;Multidrug and toxic compound extrusion family, eukaryotic	Other/Unknown
TraesCS3D02G506600	NA	3D	593345514	593348574	IPR000717;IPR027528;IPR036390;IPR040750;IPR045237	Proteasome component (PCI) domain;Eukaryotic translation initiation factor 3 subunit M;Winged helix DNA-binding domain superfamily;eIF3 subunit M, C-terminal helix domain;Eukaryotic translation initiation factor 3 subunit M eIF3m/COP9 signalosome complex subunit 7 COPS7	Other/Unknown
TraesCS3D02G506700	NA	3D	593439857	593448849	IPR002528;IPR045069	Multi antimicrobial extrusion protein;Multidrug and toxic compound extrusion family, eukaryotic	Other/Unknown
TraesCS3D02G506800	NA	3D	593637311	593638375	NA	NA	Other/Unknown
TraesCS3D02G506900	NA	3D	593653384	593656431	IPR021319	Protein of unknown function DUF2921	Other/Unknown
TraesCS3D02G507000	NA	3D	593687809	593690733	IPR021319	Protein of unknown function DUF2921	Other/Unknown
TraesCS3D02G507100	NA	3D	593706336	593709011	IPR021319	Protein of unknown function DUF2921	Other/Unknown
TraesCS3D02G507200	NA	3D	593765060	593765533	IPR003340;IPR015300;IPR050655	B3 DNA binding domain;DNA-binding pseudobarrel domain superfamily;Plant B3 domain-containing	Other/Unknown
TraesCS3D02G507300	NA	3D	593769126	593770231	NA	NA	Other/Unknown
TraesCS3D02G507400	NA	3D	593933752	593934375	IPR023577;IPR033469	CYTH domain;CYTH-like domain superfamily	Other/Unknown
TraesCS3D02G507500	NA	3D	593997437	594003965	IPR002099;IPR013507;IPR014721;IPR014762;IPR020568;IPR032189;IPR036890;IPR038973	DNA mismatch repair protein family, N-terminal;DNA mismatch repair protein, S5 domain 2-like;Small ribosomal subunit protein uS5 domain 2-type fold, subgroup;DNA mismatch repair, conserved site;Ribosomal protein uS5 domain 2-type superfamily;DNA mismatch repair protein Mlh1, C-terminal;Histidine kinase/HSP90-like ATPase superfamily;DNA mismatch repair protein MutL/Mlh/Pms-like	Other/Unknown
TraesCS3D02G507600	NA	3D	594072127	594075023	IPR002885;IPR011990;IPR032867;IPR046848;IPR046849;IPR046960	Pentatricopeptide repeat;Tetratricopeptide-like helical domain superfamily;DYW domain;E motif;E+ motif;Pentatricopeptide repeat-containing protein At4g14850-like, plant	Other/Unknown
TraesCS3D02G507700	NA	3D	594180702	594183903	NA	NA	Other/Unknown
TraesCS3D02G507800	NA	3D	594190833	594197507	IPR002099;IPR013507;IPR014721;IPR014762;IPR020568;IPR032189;IPR036890;IPR038973	DNA mismatch repair protein family, N-terminal;DNA mismatch repair protein, S5 domain 2-like;Small ribosomal subunit protein uS5 domain 2-type fold, subgroup;DNA mismatch repair, conserved site;Ribosomal protein uS5 domain 2-type superfamily;DNA mismatch repair protein Mlh1, C-terminal;Histidine kinase/HSP90-like ATPase superfamily;DNA mismatch repair protein MutL/Mlh/Pms-like	Other/Unknown
TraesCS3D02G507900	NA	3D	594197849	594203010	IPR000504;IPR012677;IPR034201;IPR035979	RNA recognition motif domain;Nucleotide-binding alpha-beta plait domain superfamily;RNPS1, RNA recognition motif;RNA-binding domain superfamily	Other/Unknown
TraesCS3D02G508000	NA	3D	594238749	594242463	IPR002885;IPR011990;IPR032867;IPR046848;IPR046849;IPR046960	Pentatricopeptide repeat;Tetratricopeptide-like helical domain superfamily;DYW domain;E motif;E+ motif;Pentatricopeptide repeat-containing protein At4g14850-like, plant	Other/Unknown
TraesCS3D02G508100	NA	3D	594478515	594482788	IPR011009	Protein kinase-like domain superfamily	Other/Unknown
TraesCS3D02G508200	NA	3D	594494604	594497590	NA	NA	Other/Unknown
TraesCS3D02G508300	NA	3D	594510595	594511488	NA	NA	Other/Unknown
TraesCS3D02G508400	NA	3D	594573981	594583032	IPR002182;IPR027417;IPR032675;IPR036388;IPR041118;IPR044974;IPR055414	NB-ARC;P-loop containing nucleoside triphosphate hydrolase;Leucine-rich repeat domain superfamily;Winged helix-like DNA-binding domain superfamily;Disease resistance, N-terminal;Disease resistance protein, plants;Disease resistance R13L4/SHOC-2-like, LRR domain	NB-LRR
TraesCS3D02G508500	NA	3D	594684711	594684947	NA	NA	Other/Unknown
TraesCS3D02G508600	NA	3D	594748860	594749415	NA	NA	Other/Unknown
TraesCS3D02G508700	NA	3D	594769919	594770140	NA	NA	Other/Unknown
TraesCS3D02G508800	NA	3D	594772286	594773143	NA	NA	Other/Unknown
TraesCS3D02G508900	NA	3D	594802578	594803164	NA	NA	Other/Unknown
TraesCS3D02G509100	NA	3D	594853729	594855300	IPR020905	NAD(P)H-quinone oxidoreductase subunit O	Other/Unknown
TraesCS3D02G509200	NA	3D	594888629	594892313	IPR019379	Gamma-secretase aspartyl protease complex, presenilin enhancer-2 subunit	Other/Unknown
TraesCS3D02G509300	NA	3D	594892966	594893894	IPR007052;IPR008978;IPR037898	CS domain;HSP20-like chaperone;NudC family	Other/Unknown
TraesCS3D02G509400	NA	3D	594953346	594954512	NA	NA	Other/Unknown
TraesCS3D02G509500	NA	3D	594955114	594956012	IPR007052;IPR008978;IPR037898	CS domain;HSP20-like chaperone;NudC family	Other/Unknown
TraesCS3D02G509600	NA	3D	594957689	594958454	IPR001232;IPR011333;IPR016072;IPR016073;IPR016897;IPR036296	S-phase kinase-associated protein 1-like;SKP1/BTB/POZ domain superfamily;SKP1 component, dimerisation;SKP1 component, POZ domain;S-phase kinase-associated protein 1;SKP1-like, dimerisation domain superfamily	Other/Unknown
TraesCS3D02G509700	NA	3D	595016277	595019674	IPR006867;IPR006868	Domain of unknown function DUF632;Domain of unknown function DUF630	Other/Unknown
TraesCS3D02G509800	NA	3D	595019779	595026219	IPR002218;IPR004416;IPR026904;IPR036188;IPR040131;IPR044920;IPR047001;IPR049312	tRNA uridine 5-carboxymethylaminomethyl modification enzyme MnmG-related;tRNA uridine 5-carboxymethylaminomethyl modification enzyme MnmG;tRNA uridine 5-carboxymethylaminomethyl modification enzyme MnmG, C-terminal;FAD/NAD(P)-binding domain superfamily;MnmG, N-terminal domain;tRNA uridine 5-carboxymethylaminomethyl modification enzyme, C-terminal subdomain superfamily;tRNA uridine 5-carboxymethyl…	Other/Unknown
TraesCS3D02G509900	NA	3D	595062529	595067402	IPR010734;IPR052079;IPR001841;IPR013083	Copine, C-terminal;E3 ubiquitin-ligases/Copine domain-containing protein;Zinc finger, RING-type;Zinc finger, RING/FYVE/PHD-type	Other/Unknown
TraesCS3D02G510000	NA	3D	595070008	595074414	IPR001841;IPR010734;IPR013083;IPR036465;IPR052079	Zinc finger, RING-type;Copine, C-terminal;Zinc finger, RING/FYVE/PHD-type;von Willebrand factor A-like domain superfamily;E3 ubiquitin-ligases/Copine domain-containing protein	Other/Unknown
TraesCS3D02G510100	NA	3D	595108022	595112470	IPR000061;IPR000626;IPR022030;IPR029071;IPR035563;IPR035967;IPR045146	SWAP/Surp;Ubiquitin-like domain;Splicing factor 3A subunit 1, conserved domain;Ubiquitin-like domain superfamily;Splicing factor 3A subunit 1, ubiquitin domain;SWAP/Surp superfamily;Splicing factor 3A subunit 1	Other/Unknown
TraesCS3D02G509000	PSD2	3D	594806899	594815946	IPR000008;IPR002048;IPR003817;IPR011992;IPR018247;IPR033177;IPR033179;IPR035892	C2 domain;EF-hand domain;Phosphatidylserine decarboxylase-related;EF-hand domain pair;EF-Hand 1, calcium-binding site;Phosphatidylserine decarboxylase;Phosphatidylserine decarboxylase, prokaryotic type 2;C2 domain superfamily	Other/Unknown
TraesCS3D02G510200	NA	3D	595269900	595271782	IPR000626;IPR019956;IPR029071;IPR050158	Ubiquitin-like domain;Ubiquitin domain;Ubiquitin-like domain superfamily;Ubiquitin and ubiquitin-like	Other/Unknown
TraesCS3D02G510300	NA	3D	595274039	595278317	IPR000626;IPR019954;IPR019956;IPR029071;IPR050158	Ubiquitin-like domain;Ubiquitin conserved site;Ubiquitin domain;Ubiquitin-like domain superfamily;Ubiquitin and ubiquitin-like	Other/Unknown
TraesCS3D02G510400	NA	3D	595285663	595288667	IPR000626;IPR019956;IPR029071;IPR050158	Ubiquitin-like domain;Ubiquitin domain;Ubiquitin-like domain superfamily;Ubiquitin and ubiquitin-like	Other/Unknown
TraesCS3D02G510500	NA	3D	595302961	595303728	IPR000626;IPR019956;IPR029071;IPR050158	Ubiquitin-like domain;Ubiquitin domain;Ubiquitin-like domain superfamily;Ubiquitin and ubiquitin-like	Other/Unknown
TraesCS3D02G510600	NA	3D	595672283	595675416	IPR000626;IPR019956;IPR029071;IPR050158	Ubiquitin-like domain;Ubiquitin domain;Ubiquitin-like domain superfamily;Ubiquitin and ubiquitin-like	Other/Unknown
TraesCS3D02G510700	NA	3D	595677455	595682102	IPR000626;IPR019956;IPR029071;IPR050158	Ubiquitin-like domain;Ubiquitin domain;Ubiquitin-like domain superfamily;Ubiquitin and ubiquitin-like	Other/Unknown
TraesCS3D02G510800	NA	3D	595739175	595739849	IPR000626;IPR019956;IPR029071;IPR050158	Ubiquitin-like domain;Ubiquitin domain;Ubiquitin-like domain superfamily;Ubiquitin and ubiquitin-like	Other/Unknown
TraesCS3D02G510900	NA	3D	595760730	595763388	IPR000626;IPR019954;IPR019956;IPR029071;IPR050158	Ubiquitin-like domain;Ubiquitin conserved site;Ubiquitin domain;Ubiquitin-like domain superfamily;Ubiquitin and ubiquitin-like	Other/Unknown
TraesCS3D02G511000	NA	3D	595855346	595859915	IPR000626;IPR019956;IPR029071;IPR050158	Ubiquitin-like domain;Ubiquitin domain;Ubiquitin-like domain superfamily;Ubiquitin and ubiquitin-like	Other/Unknown
TraesCS3D02G511100	NA	3D	595940553	595942439	IPR000719;IPR001245;IPR011009;IPR017441;IPR024788;IPR045272	Protein kinase domain;Serine-threonine/tyrosine-protein kinase, catalytic domain;Protein kinase-like domain superfamily;Protein kinase, ATP binding site;Malectin-like domain;Receptor-like protein kinase ANXUR1/2-like	RLK-other
TraesCS3D02G511200	NA	3D	596021215	596022298	IPR000626;IPR019956;IPR029071;IPR050158	Ubiquitin-like domain;Ubiquitin domain;Ubiquitin-like domain superfamily;Ubiquitin and ubiquitin-like	Other/Unknown
TraesCS3D02G511300	NA	3D	596056968	596061325	IPR001841;IPR010652;IPR013083;IPR017907;IPR018957;IPR038896	Zinc finger, RING-type;Domain of unknown function DUF1232;Zinc finger, RING/FYVE/PHD-type;Zinc finger, RING-type, conserved site;Zinc finger, C3HC4 RING-type;E3 ubiquitin-protein ligase RNF170	Other/Unknown
TraesCS3D02G511400	NA	3D	596072981	596074440	IPR000215;IPR023796;IPR036186;IPR042178;IPR042185	Serpin family;Serpin domain;Serpin superfamily;Serpin superfamily, domain 1;Serpin superfamily, domain 2	Other/Unknown
TraesCS3D02G511500	NA	3D	596096305	596113079	IPR000626;IPR019954;IPR019956;IPR029071;IPR050158	Ubiquitin-like domain;Ubiquitin conserved site;Ubiquitin domain;Ubiquitin-like domain superfamily;Ubiquitin and ubiquitin-like	Other/Unknown
TraesCS3D02G511600	NA	3D	596161236	596162048	IPR002160;IPR011065	Proteinase inhibitor I3, Kunitz legume;Kunitz inhibitor STI-like superfamily	Other/Unknown
TraesCS3D02G511614	NA	3D	596177559	596178263	IPR002160;IPR011065	Proteinase inhibitor I3, Kunitz legume;Kunitz inhibitor STI-like superfamily	Other/Unknown
TraesCS3D02G511617	NA	3D	596193110	596193814	IPR002160;IPR011065	Proteinase inhibitor I3, Kunitz legume;Kunitz inhibitor STI-like superfamily	Other/Unknown
TraesCS3D02G511700	NA	3D	596635640	596636518	IPR001810;IPR036047	F-box domain;F-box-like domain superfamily	Other/Unknown
TraesCS3D02G511800	NA	3D	596690019	596693567	IPR002182;IPR027417;IPR032675;IPR038005;IPR041118;IPR044974;IPR055414	NB-ARC;P-loop containing nucleoside triphosphate hydrolase;Leucine-rich repeat domain superfamily;Virus X resistance protein-like, coiled-coil domain;Disease resistance, N-terminal;Disease resistance protein, plants;Disease resistance R13L4/SHOC-2-like, LRR domain	NB-LRR
TraesCS3D02G511900	NA	3D	596717817	596721641	IPR000626;IPR019956;IPR029071;IPR050158	Ubiquitin-like domain;Ubiquitin domain;Ubiquitin-like domain superfamily;Ubiquitin and ubiquitin-like	Other/Unknown
TraesCS3D02G512000	NA	3D	596780248	596781808	IPR004158	Protein of unknown function DUF247, plant	Other/Unknown
TraesCS3D02G512100	NA	3D	596846242	596851438	IPR000719;IPR001245;IPR008271;IPR011009;IPR017441;IPR024788;IPR045272	Protein kinase domain;Serine-threonine/tyrosine-protein kinase, catalytic domain;Serine/threonine-protein kinase, active site;Protein kinase-like domain superfamily;Protein kinase, ATP binding site;Malectin-like domain;Receptor-like protein kinase ANXUR1/2-like	RLK-other
TraesCS3D02G512200	NA	3D	596885466	596886587	IPR004045;IPR004046;IPR010987;IPR036249;IPR036282;IPR040079;IPR045073;IPR045074	Glutathione S-transferase, N-terminal;Glutathione S-transferase, C-terminal;Glutathione S-transferase, C-terminal-like;Thioredoxin-like superfamily;Glutathione S-transferase, C-terminal domain superfamily;Glutathione transferase family;Glutathione S-transferase Omega/Tau-like;Glutathione S-transferases Tau, C-terminal alpha helical domain, plant	Other/Unknown
TraesCS3D02G512300	NA	3D	596889809	596891831	IPR000490;IPR017853;IPR044965	Glycoside hydrolase family 17;Glycoside hydrolase superfamily;Glycoside hydrolase family 17, plant	Other/Unknown
TraesCS3D02G512400	NA	3D	596912028	596915547	IPR009294	Gamma-secretase subunit Aph-1	Other/Unknown
TraesCS3D02G512500	NA	3D	596993603	596995622	IPR000743;IPR006626;IPR011050;IPR012334	Glycoside hydrolase, family 28;Parallel beta-helix repeat;Pectin lyase fold/virulence factor;Pectin lyase fold	Other/Unknown
TraesCS3D02G512600	NA	3D	597069527	597071687	IPR003314;IPR005174	Mu-type HTH domain;KIB1-4, beta-propeller	Other/Unknown
TraesCS3D02G512700	NA	3D	597095910	597097486	IPR013010;IPR013083;IPR044286	Zinc finger, SIAH-type;Zinc finger, RING/FYVE/PHD-type;E3 ubiquitin-protein ligase SINA-like, plant	Other/Unknown
TraesCS3D02G512800	NA	3D	597207677	597208198	IPR019557;IPR044824	Aminotransferase-like, plant mobile domain;Protein MAINTENANCE OF MERISTEMS-like	Other/Unknown
TraesCS3D02G512900	NA	3D	597264600	597265932	IPR000743;IPR006626;IPR011050;IPR012334	Glycoside hydrolase, family 28;Parallel beta-helix repeat;Pectin lyase fold/virulence factor;Pectin lyase fold	Other/Unknown
TraesCS3D02G513000	NA	3D	597295790	597298101	IPR002182;IPR027417;IPR032675;IPR036388;IPR042197;IPR044974;IPR055414	NB-ARC;P-loop containing nucleoside triphosphate hydrolase;Leucine-rich repeat domain superfamily;Winged helix-like DNA-binding domain superfamily;Apoptotic protease-activating factors, helical domain;Disease resistance protein, plants;Disease resistance R13L4/SHOC-2-like, LRR domain	NB-LRR
TraesCS3D02G513100	NA	3D	597398066	597399127	IPR000210;IPR002083;IPR008974;IPR011333;IPR045005;IPR056423	BTB/POZ domain;MATH/TRAF domain;TRAF-like;SKP1/BTB/POZ domain superfamily;BTB/POZ and MATH domain-containing protein 1-6;BPM/SPOP, BACK domain	Other/Unknown
TraesCS3D02G513200	NA	3D	597406924	597410376	IPR002182;IPR027417;IPR038005;IPR041118;IPR042197	NB-ARC;P-loop containing nucleoside triphosphate hydrolase;Virus X resistance protein-like, coiled-coil domain;Disease resistance, N-terminal;Apoptotic protease-activating factors, helical domain	Other/Unknown
TraesCS3D02G513300	NA	3D	597421302	597421553	NA	NA	Other/Unknown
TraesCS3D02G513400	NA	3D	597477005	597483170	IPR002182;IPR027417;IPR032675;IPR036388;IPR042197;IPR044974;IPR055414	NB-ARC;P-loop containing nucleoside triphosphate hydrolase;Leucine-rich repeat domain superfamily;Winged helix-like DNA-binding domain superfamily;Apoptotic protease-activating factors, helical domain;Disease resistance protein, plants;Disease resistance R13L4/SHOC-2-like, LRR domain	NB-LRR
TraesCS3D02G513500	NA	3D	597485531	597490492	IPR002182;IPR027417;IPR032675;IPR036388;IPR038005;IPR041118;IPR042197;IPR044974;IPR055414	NB-ARC;P-loop containing nucleoside triphosphate hydrolase;Leucine-rich repeat domain superfamily;Winged helix-like DNA-binding domain superfamily;Virus X resistance protein-like, coiled-coil domain;Disease resistance, N-terminal;Apoptotic protease-activating factors, helical domain;Disease resistance protein, plants;Disease resistance R13L4/SHOC-2-like, LRR domain	NB-LRR
TraesCS3D02G513600	NA	3D	597546896	597548475	NA	NA	Other/Unknown
TraesCS3D02G513700	NA	3D	597616763	597620277	IPR000270;IPR000644;IPR046342;IPR051462;IPR053793	PB1 domain;CBS domain;CBS domain superfamily;CBS domain-containing protein;PB1-like domain	Other/Unknown
TraesCS3D02G513800	NA	3D	597672133	597673199	IPR002100;IPR036879	Transcription factor, MADS-box;Transcription factor, MADS-box superfamily	Other/Unknown
TraesCS3D02G513900	NA	3D	597916186	597924103	IPR002213	UDP-glucuronosyl/UDP-glucosyltransferase	Other/Unknown
TraesCS3D02G514000	NA	3D	597939055	597940565	NA	NA	Other/Unknown
TraesCS3D02G514100	NA	3D	598009993	598013593	IPR013626;IPR015881;IPR017941;IPR036922;IPR050584	Pheophorbide a oxygenase;Aromatic-ring-hydroxylating dioxygenase, 2Fe-2S-binding site;Rieske [2Fe-2S] iron-sulphur domain;Rieske [2Fe-2S] iron-sulphur domain superfamily;Cholesterol 7-desaturase	Other/Unknown
TraesCS3D02G514200	NA	3D	598037194	598042868	IPR002213	UDP-glucuronosyl/UDP-glucosyltransferase	Other/Unknown
TraesCS3D02G514300	NA	3D	598047864	598049310	IPR036291;IPR055222	NAD(P)-binding domain superfamily;PRISE-like, Rossmann-fold domain	Other/Unknown
TraesCS3D02G514400	NA	3D	598060798	598062217	IPR036291;IPR055222	NAD(P)-binding domain superfamily;PRISE-like, Rossmann-fold domain	Other/Unknown
TraesCS3D02G514500	NA	3D	598072681	598081061	IPR002213	UDP-glucuronosyl/UDP-glucosyltransferase	Other/Unknown
TraesCS3D02G514600	NA	3D	598096211	598097551	IPR023213;IPR050317	Chloramphenicol acetyltransferase-like domain superfamily;Plant and Fungal Acyltransferase	Other/Unknown
TraesCS3D02G514700	NA	3D	598160861	598163274	IPR002213	UDP-glucuronosyl/UDP-glucosyltransferase	Other/Unknown
TraesCS3D02G514800	NA	3D	598190202	598192165	IPR006593;IPR043205	Cytochrome b561/ferric reductase transmembrane;Cytochrome b561/Cytochrome b reductase 1-like	Other/Unknown
TraesCS3D02G514900	NA	3D	598708064	598712397	IPR008901	Alkaline ceramidase	Other/Unknown
TraesCS3D02G515000	NA	3D	598724560	598726369	IPR001087;IPR036514	GDSL lipase/esterase;SGNH hydrolase superfamily	Other/Unknown
TraesCS3D02G515100	NA	3D	598859961	598862903	IPR002110;IPR026961;IPR036770	Ankyrin repeat;PGG domain;Ankyrin repeat-containing domain superfamily	Other/Unknown
TraesCS3D02G515200	NA	3D	598882397	598885014	IPR005375;IPR029071	Ubiquitin-fold modifier 1;Ubiquitin-like domain superfamily	Other/Unknown
TraesCS3D02G515300	NA	3D	598886042	598890902	IPR007529;IPR051639	Zinc finger, HIT-type;Box C/D snoRNA	Other/Unknown
TraesCS3D02G515400	NA	3D	598894932	598906191	IPR002182;IPR027417;IPR032675;IPR036388;IPR044974;IPR056789	NB-ARC;P-loop containing nucleoside triphosphate hydrolase;Leucine-rich repeat domain superfamily;Winged helix-like DNA-binding domain superfamily;Disease resistance protein, plants;R13L1/DRL21-like, LRR repeat region	NB-LRR
TraesCS3D02G515500	NA	3D	598927500	598938561	IPR002182;IPR027417;IPR032675;IPR036388;IPR042197;IPR056789	NB-ARC;P-loop containing nucleoside triphosphate hydrolase;Leucine-rich repeat domain superfamily;Winged helix-like DNA-binding domain superfamily;Apoptotic protease-activating factors, helical domain;R13L1/DRL21-like, LRR repeat region	NB-LRR
TraesCS3D02G515600	NA	3D	599052976	599054416	IPR007590;IPR043701	Saf4/Yju2 protein;Splicing factor Yju2	Other/Unknown
TraesCS3D02G515700	NA	3D	599163786	599166700	IPR046533	Domain of unknown function DUF6598	Other/Unknown
TraesCS3D02G515800	NA	3D	599176167	599178611	IPR046533	Domain of unknown function DUF6598	Other/Unknown
TraesCS3D02G515900	NA	3D	599195462	599198330	IPR016138;IPR036041	Ribosome-inactivating protein, subdomain 1;Ribosome-inactivating protein superfamily	Other/Unknown
TraesCS3D02G516000	NA	3D	599263474	599266216	IPR016138;IPR036041	Ribosome-inactivating protein, subdomain 1;Ribosome-inactivating protein superfamily	Other/Unknown
TraesCS3D02G516100	NA	3D	599267024	599269278	IPR046533	Domain of unknown function DUF6598	Other/Unknown
TraesCS3D02G516200	NA	3D	600123710	600126996	IPR000727;IPR010989;IPR015260	Target SNARE coiled-coil homology domain;SNARE;Syntaxin 6/10/61, N-terminal	Other/Unknown
TraesCS3D02G516300	NA	3D	600153683	600158550	IPR002182;IPR027417;IPR032675;IPR036388;IPR041118;IPR042197;IPR056789	NB-ARC;P-loop containing nucleoside triphosphate hydrolase;Leucine-rich repeat domain superfamily;Winged helix-like DNA-binding domain superfamily;Disease resistance, N-terminal;Apoptotic protease-activating factors, helical domain;R13L1/DRL21-like, LRR repeat region	NB-LRR
TraesCS3D02G516400	NA	3D	600172455	600175099	IPR011042;IPR011659	Six-bladed beta-propeller, TolB-like;WD40-like beta propeller	Other/Unknown
TraesCS3D02G516500	NA	3D	600178359	600179594	IPR013094;IPR029058;IPR050466	Alpha/beta hydrolase fold-3;Alpha/Beta hydrolase fold;Diverse Carboxylesterases and Gibberellin Receptors	Other/Unknown
TraesCS3D02G516600	NA	3D	600187032	600188952	IPR002035;IPR032838;IPR036465;IPR051266	von Willebrand factor, type A;VWA-Hint protein, Vwaint domain;von Willebrand factor A-like domain superfamily;Calcium-activated chloride channel regulator	Other/Unknown
TraesCS3D02G516700	NA	3D	600260274	600262211	IPR001229;IPR004265;IPR036404;IPR044859	Jacalin-like lectin domain;Dirigent protein;Jacalin-like lectin domain superfamily;Allene oxide cyclase/Dirigent protein	Other/Unknown
TraesCS3D02G516800	NA	3D	600418757	600421439	IPR005746;IPR013766;IPR017937;IPR036249	Thioredoxin;Thioredoxin domain;Thioredoxin, conserved site;Thioredoxin-like superfamily	Other/Unknown
TraesCS3D02G516900	NA	3D	600423389	600424645	IPR000823;IPR002016;IPR010255;IPR019793;IPR019794;IPR033905	Plant peroxidase;Haem peroxidase;Haem peroxidase superfamily;Peroxidases heam-ligand binding site;Peroxidase, active site;Secretory peroxidase	Other/Unknown
TraesCS3D02G517000	NA	3D	600528307	600529778	IPR000823;IPR002016;IPR010255;IPR019793;IPR019794;IPR033905	Plant peroxidase;Haem peroxidase;Haem peroxidase superfamily;Peroxidases heam-ligand binding site;Peroxidase, active site;Secretory peroxidase	Other/Unknown
TraesCS3D02G517100	NA	3D	600563453	600564143	IPR003496	ABA/WDS induced protein	Other/Unknown
TraesCS3D02G517200	NA	3D	600584896	600585381	NA	NA	Other/Unknown
TraesCS3D02G517300	NA	3D	600594346	600595436	IPR003496	ABA/WDS induced protein	Other/Unknown
TraesCS3D02G517600	NA	3D	600621528	600622227	IPR003496	ABA/WDS induced protein	Other/Unknown
TraesCS3D02G517400	ASR	3D	600607769	600608866	IPR003496	ABA/WDS induced protein	Other/Unknown
TraesCS3D02G517500	ASR	3D	600617171	600617866	IPR003496	ABA/WDS induced protein	Other/Unknown
TraesCS3D02G517800	NA	3D	600632233	600633569	IPR000823;IPR002016;IPR010255;IPR019793;IPR019794;IPR033905	Plant peroxidase;Haem peroxidase;Haem peroxidase superfamily;Peroxidases heam-ligand binding site;Peroxidase, active site;Secretory peroxidase	Other/Unknown
TraesCS3D02G517700	ASR	3D	600624824	600625221	IPR003496	ABA/WDS induced protein	Other/Unknown
TraesCS3D02G517900	NA	3D	600640262	600641202	IPR002675;IPR038464	Large ribosomal subunit protein eL38;Large ribosomal subunit protein eL38 superfamily	Other/Unknown
TraesCS3D02G518200	NA	3D	600819763	600820839	IPR000823;IPR002016;IPR010255;IPR019793;IPR019794;IPR033905	Plant peroxidase;Haem peroxidase;Haem peroxidase superfamily;Peroxidases heam-ligand binding site;Peroxidase, active site;Secretory peroxidase	Other/Unknown
TraesCS3D02G518000	ASR	3D	600655220	600655626	IPR003496	ABA/WDS induced protein	Other/Unknown
TraesCS3D02G518100	ASR	3D	600665541	600665933	IPR003496	ABA/WDS induced protein	Other/Unknown
TraesCS3D02G518300	NA	3D	601223732	601223977	NA	NA	Other/Unknown
TraesCS3D02G518500	NA	3D	601477944	601483280	IPR005174;IPR036047	KIB1-4, beta-propeller;F-box-like domain superfamily	Other/Unknown
TraesCS3D02G518700	NA	3D	601615133	601615824	IPR007852;IPR032041;IPR038103	Cdc73/Parafibromin;Paf1 complex subunit Cdc73, N-terminal domain;Cell division control protein 73, C-terminal domain superfamily	Other/Unknown
TraesCS3D02G518800	NA	3D	601617485	601618545	IPR036047;IPR044809	F-box-like domain superfamily;F-box protein AUF1-like	Other/Unknown
TraesCS3D02G518900	NA	3D	601625875	601626839	IPR001087;IPR036514;IPR051058	GDSL lipase/esterase;SGNH hydrolase superfamily;GDSL Esterase/Lipase Enzyme	Other/Unknown
TraesCS3D02G519000	NA	3D	601917967	601925473	IPR020864;IPR044663	Membrane attack complex component/perforin (MACPF) domain;MACPF domain-containing protein CAD1/NSL1-like	Other/Unknown
TraesCS3D02G519100	NA	3D	602044430	602047439	NA	NA	Other/Unknown
TraesCS3D02G519200	NA	3D	602199098	602202213	IPR001388;IPR010908;IPR011012;IPR042855;IPR045848	Synaptobrevin-like;Longin domain;Longin-like domain superfamily;v-SNARE, coiled-coil homology domain;YKT6, SNARE motif	Other/Unknown
TraesCS3D02G519300	NA	3D	602214766	602217602	IPR002129;IPR015421;IPR015422;IPR015424;IPR051151	Pyridoxal phosphate-dependent decarboxylase;Pyridoxal phosphate-dependent transferase, major domain;Pyridoxal phosphate-dependent transferase, small domain;Pyridoxal phosphate-dependent transferase;Group II Amino Acid Decarboxylase	Other/Unknown
TraesCS3D02G519400	NA	3D	602235171	602237672	IPR036047	F-box-like domain superfamily	Other/Unknown
TraesCS3D02G519500	NA	3D	602259006	602261633	IPR001810;IPR036047	F-box domain;F-box-like domain superfamily	Other/Unknown
TraesCS3D02G519600	NA	3D	602274002	602277166	IPR002129;IPR015421;IPR015422;IPR015424;IPR021115;IPR051151	Pyridoxal phosphate-dependent decarboxylase;Pyridoxal phosphate-dependent transferase, major domain;Pyridoxal phosphate-dependent transferase, small domain;Pyridoxal phosphate-dependent transferase;Pyridoxal-phosphate binding site;Group II Amino Acid Decarboxylase	Other/Unknown
TraesCS3D02G519700	NA	3D	602323783	602329619	IPR004087;IPR004088;IPR036612	K Homology domain;K Homology domain, type 1;K Homology domain, type 1 superfamily	Other/Unknown
TraesCS3D02G519800	NA	3D	602427532	602431970	NA	NA	Other/Unknown
TraesCS3D02G519900	NA	3D	602447396	602450095	NA	NA	Other/Unknown
TraesCS3D02G520000	NA	3D	602455009	602458105	NA	NA	Other/Unknown
TraesCS3D02G520100	NA	3D	602723144	602728520	NA	NA	Other/Unknown
TraesCS3D02G520200	NA	3D	602749619	602752763	NA	NA	Other/Unknown
TraesCS3D02G520300	NA	3D	602779892	602781389	IPR001810;IPR032675;IPR036047;IPR055411	F-box domain;Leucine-rich repeat domain superfamily;F-box-like domain superfamily;F-box/LRR-repeat protein 15/At3g58940/PEG3-like, LRR domain	RLP
TraesCS3D02G520400	NA	3D	602797568	602803675	IPR001810;IPR032675;IPR036047;IPR055411	F-box domain;Leucine-rich repeat domain superfamily;F-box-like domain superfamily;F-box/LRR-repeat protein 15/At3g58940/PEG3-like, LRR domain	RLP
TraesCS3D02G520500	NA	3D	602818384	602819324	NA	NA	Other/Unknown
TraesCS3D02G520600	NA	3D	602874032	602874345	NA	NA	Other/Unknown
TraesCS3D02G520700	NA	3D	602890239	602891535	IPR001750	NADH:quinone oxidoreductase/Mrp antiporter, transmembrane domain	Other/Unknown
TraesCS3D02G520800	NA	3D	602899321	602899791	IPR003319;IPR009455;IPR044975	ATP synthase YMF19-like, N-terminal;ATP synthase YMF19, uncharacterised, C-terminal;ATP synthase protein YMF19	Other/Unknown
TraesCS3D02G520900	NA	3D	603014095	603015636	IPR001128;IPR002401;IPR017972;IPR036396	Cytochrome P450;Cytochrome P450, E-class, group I;Cytochrome P450, conserved site;Cytochrome P450 superfamily	Other/Unknown
TraesCS3D02G521000	NA	3D	603108345	603109772	NA	NA	Other/Unknown
TraesCS3D02G521100	NA	3D	603112925	603115139	IPR001128;IPR002401;IPR036396;IPR050651	Cytochrome P450;Cytochrome P450, E-class, group I;Cytochrome P450 superfamily;Plant Cytochrome P450 Monooxygenase	Other/Unknown
TraesCS3D02G521200	NA	3D	603116048	603117054	IPR001128;IPR002401;IPR017972;IPR036396;IPR050651	Cytochrome P450;Cytochrome P450, E-class, group I;Cytochrome P450, conserved site;Cytochrome P450 superfamily;Plant Cytochrome P450 Monooxygenase	Other/Unknown
TraesCS3D02G521300	NA	3D	603151839	603152505	IPR001128;IPR002401;IPR036396;IPR050651	Cytochrome P450;Cytochrome P450, E-class, group I;Cytochrome P450 superfamily;Plant Cytochrome P450 Monooxygenase	Other/Unknown
TraesCS3D02G521400	NA	3D	603154905	603156615	NA	NA	Other/Unknown
TraesCS3D02G521500	NA	3D	603221783	603224925	IPR012677;IPR035979;IPR039884	Nucleotide-binding alpha-beta plait domain superfamily;RNA-binding domain superfamily;Coiled-coil domain-containing protein R3HC1/R3HCL	Other/Unknown
TraesCS3D02G521600	NA	3D	603263906	603272718	IPR002853;IPR013083;IPR017919;IPR024550;IPR036390;IPR039997	Transcription initiation factor IIE subunit alpha, N-terminal;Zinc finger, RING/FYVE/PHD-type;Transcription factor TFE/TFIIEalpha HTH domain;TFIIEalpha/SarR/Rpc3 HTH domain;Winged helix DNA-binding domain superfamily;Transcription factor E	Other/Unknown
TraesCS3D02G521700	NA	3D	603321526	603322079	IPR002119;IPR009072;IPR032454;IPR032458	Histone H2A;Histone-fold;Histone H2A, C-terminal domain;Histone H2A conserved site	Other/Unknown
TraesCS3D02G521800	NA	3D	603371833	603375778	IPR001214;IPR046341;IPR053114	SET domain;SET domain superfamily;Histone-lysine N-methyltransferase ATXR5/ATXR6	Other/Unknown
TraesCS3D02G521900	NA	3D	603407308	603409862	IPR001214;IPR001965;IPR011011;IPR013083;IPR019787;IPR046341;IPR053114	SET domain;Zinc finger, PHD-type;Zinc finger, FYVE/PHD-type;Zinc finger, RING/FYVE/PHD-type;Zinc finger, PHD-finger;SET domain superfamily;Histone-lysine N-methyltransferase ATXR5/ATXR6	Other/Unknown
TraesCS3D02G522000	NA	3D	603414117	603419665	IPR001048;IPR015963;IPR036393	Aspartate/glutamate/uridylate kinase;Uridylate kinase, bacteria;Acetylglutamate kinase-like superfamily	Other/Unknown
TraesCS3D02G522100	NA	3D	603426014	603429114	IPR004314;IPR053168	Neprosin;Glutamic endopeptidase	Other/Unknown
TraesCS3D02G522200	NA	3D	603434898	603436577	NA	NA	Other/Unknown
TraesCS3D02G522300	NA	3D	603485446	603490225	IPR000535;IPR000719;IPR008271;IPR008962;IPR011009;IPR013783;IPR017441	Major sperm protein (MSP) domain;Protein kinase domain;Serine/threonine-protein kinase, active site;PapD-like superfamily;Protein kinase-like domain superfamily;Immunoglobulin-like fold;Protein kinase, ATP binding site	RLK-other
TraesCS3D02G522400	NA	3D	603588740	603597634	IPR000722;IPR006592;IPR007080;IPR044893;IPR045867	RNA polymerase, alpha subunit;RNA polymerase, N-terminal;RNA polymerase Rpb1, domain 1;RNA polymerase Rpb1, clamp domain superfamily;DNA-directed RNA polymerase, subunit beta-prime	Other/Unknown
TraesCS3D02G522500	NA	3D	603598103	603599558	IPR018108;IPR023395	Mitochondrial substrate/solute carrier;Mitochondrial carrier domain superfamily	Other/Unknown
TraesCS3D02G522600	NA	3D	603600473	603605796	IPR000306;IPR000408;IPR009091;IPR011011;IPR013083;IPR013591;IPR017455;IPR027988;IPR051210	FYVE zinc finger;Regulator of chromosome condensation, RCC1;Regulator of chromosome condensation 1/beta-lactamase-inhibitor protein II;Zinc finger, FYVE/PHD-type;Zinc finger, RING/FYVE/PHD-type;Brevis radix (BRX) domain;Zinc finger, FYVE-related;Transcription factor BREVIS RADIX, N-terminal domain;Ubiquitin ligases and GEF domain-containing protein	Other/Unknown
TraesCS3D02G522700	NA	3D	603631869	603635220	NA	NA	Other/Unknown
TraesCS3D02G522800	NA	3D	603739964	603746617	IPR029071;IPR038357	Ubiquitin-like domain superfamily;KEN domain superfamily	Other/Unknown
TraesCS3D02G522900	NA	3D	603866014	603869272	NA	NA	Other/Unknown
TraesCS3D02G523000	NA	3D	603940166	603945438	IPR001810;IPR032675;IPR036047;IPR055411	F-box domain;Leucine-rich repeat domain superfamily;F-box-like domain superfamily;F-box/LRR-repeat protein 15/At3g58940/PEG3-like, LRR domain	RLP
TraesCS3D02G523100	NA	3D	603962124	603964699	IPR001810;IPR032675;IPR036047;IPR055411	F-box domain;Leucine-rich repeat domain superfamily;F-box-like domain superfamily;F-box/LRR-repeat protein 15/At3g58940/PEG3-like, LRR domain	RLP
TraesCS3D02G523200	NA	3D	603973126	603976133	IPR002129;IPR010107;IPR015421;IPR015424	Pyridoxal phosphate-dependent decarboxylase;Glutamate decarboxylase;Pyridoxal phosphate-dependent transferase, major domain;Pyridoxal phosphate-dependent transferase	Other/Unknown
TraesCS3D02G523300	NA	3D	604112148	604113162	IPR000484;IPR036854;IPR055266	Photosynthetic reaction centre, L/M;Photosystem II protein D1/D2 superfamily;Photosystem II protein D1/D2	Other/Unknown
TraesCS3D02G523400	NA	3D	604122552	604125024	IPR001810;IPR032675;IPR036047;IPR055411	F-box domain;Leucine-rich repeat domain superfamily;F-box-like domain superfamily;F-box/LRR-repeat protein 15/At3g58940/PEG3-like, LRR domain	RLP
TraesCS3D02G523500	NA	3D	604135895	604137096	IPR032675;IPR053772;IPR055411	Leucine-rich repeat domain superfamily;FBD-associated F-box protein At1g61320/At1g61330-like;F-box/LRR-repeat protein 15/At3g58940/PEG3-like, LRR domain	RLP
TraesCS3D02G523600	NA	3D	604235296	604237867	IPR001810;IPR032675;IPR036047;IPR055411;IPR053772	F-box domain;Leucine-rich repeat domain superfamily;F-box-like domain superfamily;F-box/LRR-repeat protein 15/At3g58940/PEG3-like, LRR domain;FBD-associated F-box protein At1g61320/At1g61330-like	RLP
TraesCS3D02G524700	PR4B	3D	604447774	604448529	IPR001153;IPR018226;IPR036908;IPR044301	Barwin domain;Barwin, conserved site;RlpA-like domain superfamily;Pathogenesis-related protein-4	Other/Unknown
TraesCS3D02G523700	NA	3D	604250986	604253815	IPR001810;IPR032675;IPR036047;IPR055411	F-box domain;Leucine-rich repeat domain superfamily;F-box-like domain superfamily;F-box/LRR-repeat protein 15/At3g58940/PEG3-like, LRR domain	RLP
TraesCS3D02G523800	NA	3D	604286566	604289237	IPR001810;IPR032675;IPR036047;IPR055411	F-box domain;Leucine-rich repeat domain superfamily;F-box-like domain superfamily;F-box/LRR-repeat protein 15/At3g58940/PEG3-like, LRR domain	RLP
TraesCS3D02G523900	NA	3D	604290379	604292091	IPR032710	NTF2-like domain superfamily	Other/Unknown
TraesCS3D02G524000	NA	3D	604303148	604304444	NA	NA	Other/Unknown
TraesCS3D02G524100	NA	3D	604351291	604362472	IPR003439;IPR003593;IPR011527;IPR017871;IPR027417;IPR036640;IPR050835	ABC transporter-like, ATP-binding domain;AAA+ ATPase domain;ABC transporter type 1, transmembrane domain;ABC transporter-like, conserved site;P-loop containing nucleoside triphosphate hydrolase;ABC transporter type 1, transmembrane domain superfamily;ATP-binding cassette sub-family D	Other/Unknown
TraesCS3D02G524200	NA	3D	604362523	604363392	IPR003425	CCB3/YggT	Other/Unknown
TraesCS3D02G524300	NA	3D	604363563	604367489	IPR007863;IPR011249;IPR011765;IPR050361	Peptidase M16, C-terminal;Metalloenzyme, LuxS/M16 peptidase-like;Peptidase M16, N-terminal;Mitochondrial Processing Peptidase/Ubiquinol-cytochrome c Reductase Complex	Other/Unknown
TraesCS3D02G524400	NA	3D	604367637	604371395	IPR001611;IPR003591;IPR032675;IPR050836	Leucine-rich repeat;Leucine-rich repeat, typical subtype;Leucine-rich repeat domain superfamily;SDS22/Internalin LRR-containing	RLP
TraesCS3D02G524500	NA	3D	604371604	604373719	IPR007262	Vps55/LEPROT	Other/Unknown
TraesCS3D02G524600	NA	3D	604397506	604401112	IPR001362;IPR013148;IPR013189;IPR013320;IPR018053;IPR023296;IPR050551	Glycoside hydrolase, family 32;Glycosyl hydrolase family 32, N-terminal;Glycosyl hydrolase family 32, C-terminal;Concanavalin A-like lectin/glucanase domain superfamily;Glycoside hydrolase, family 32, active site;Glycosyl hydrolase, five-bladed beta-propeller domain superfamily;Plant Fructan Metabolism Enzymes	Other/Unknown
TraesCS3D02G524800	NA	3D	604522595	604524583	IPR001163;IPR010920;IPR027248;IPR047575	Sm domain, eukaryotic/archaea-type;LSM domain superfamily;Small nuclear ribonucleoprotein Sm D2;Sm domain	Other/Unknown
TraesCS3D02G524900	NA	3D	604530197	604534179	IPR024462;IPR052566	Glycosyl-hydrolase family 116, N-terminal;Non-lysosomal glucosylceramidase	Other/Unknown
TraesCS3D02G525000	NA	3D	604608127	604613473	IPR023213;IPR050317	Chloramphenicol acetyltransferase-like domain superfamily;Plant and Fungal Acyltransferase	Other/Unknown
TraesCS3D02G525100	NA	3D	604635814	604636359	IPR006501;IPR034088;IPR035513	Pectinesterase inhibitor domain;Pla a 1-like;Invertase/pectin methylesterase inhibitor domain superfamily	Other/Unknown
TraesCS3D02G525200	NA	3D	604666130	604674337	NA	NA	Other/Unknown
TraesCS3D02G525300	NA	3D	604684032	604688390	IPR005935;IPR014721;IPR020568;IPR029765;IPR036554;IPR041431;IPR053859	Diphosphomevalonate/phosphomevalonate decarboxylase;Small ribosomal subunit protein uS5 domain 2-type fold, subgroup;Ribosomal protein uS5 domain 2-type superfamily;Diphosphomevalonate decarboxylase;GHMP kinase, C-terminal domain superfamily;Mvd1, C-terminal;Diphosphomevalonate decarboxylase-like N-terminal domain	Other/Unknown
TraesCS3D02G525400	NA	3D	604698898	604700094	IPR005174	KIB1-4, beta-propeller	Other/Unknown
TraesCS3D02G525500	NA	3D	604815950	604817113	IPR005174	KIB1-4, beta-propeller	Other/Unknown
TraesCS3D02G525600	NA	3D	604836573	604839386	IPR005174	KIB1-4, beta-propeller	Other/Unknown
TraesCS3D02G525700	NA	3D	604859228	604863200	IPR001948;IPR023358	Peptidase M18;Peptidase M18, domain 2	Other/Unknown
TraesCS3D02G527800	eIF4E	3D	606082027	606085744	IPR001040;IPR019770;IPR023398	Translation Initiation factor eIF- 4e;Eukaryotic translation initiation factor 4E (eIF-4E), conserved site;Translation Initiation factor eIF- 4e-like	Other/Unknown
TraesCS3D02G525800	NA	3D	604864081	604868149	IPR011990;IPR031595;IPR033443	Tetratricopeptide-like helical domain superfamily;Protein-only RNase P, C-terminal;PROP1-like, PPR domain	Other/Unknown
TraesCS3D02G525900	NA	3D	604890954	604892244	IPR009646	Root cap	Other/Unknown
TraesCS3D02G526000	NA	3D	604967117	604968552	IPR009646	Root cap	Other/Unknown
TraesCS3D02G526100	NA	3D	605025908	605027192	IPR009646	Root cap	Other/Unknown
TraesCS3D02G526200	NA	3D	605034207	605035615	IPR009646	Root cap	Other/Unknown
TraesCS3D02G526300	NA	3D	605068736	605072575	IPR001128;IPR002401;IPR036396	Cytochrome P450;Cytochrome P450, E-class, group I;Cytochrome P450 superfamily	Other/Unknown
TraesCS3D02G526400	NA	3D	605156756	605161383	IPR001128;IPR002401;IPR036396	Cytochrome P450;Cytochrome P450, E-class, group I;Cytochrome P450 superfamily	Other/Unknown
TraesCS3D02G526500	NA	3D	605223503	605224046	NA	NA	Other/Unknown
TraesCS3D02G526600	NA	3D	605330582	605335815	IPR032675;IPR036388;IPR044974;IPR055414	Leucine-rich repeat domain superfamily;Winged helix-like DNA-binding domain superfamily;Disease resistance protein, plants;Disease resistance R13L4/SHOC-2-like, LRR domain	RLP
TraesCS3D02G526800	NA	3D	605521880	605524364	IPR007658;IPR025315	Protein of unknown function DUF594;Domain of unknown function DUF4220	Other/Unknown
TraesCS3D02G526900	NA	3D	605667326	605669673	IPR000719;IPR008271;IPR011009;IPR017441	Protein kinase domain;Serine/threonine-protein kinase, active site;Protein kinase-like domain superfamily;Protein kinase, ATP binding site	RLK-other
TraesCS3D02G527200	NA	3D	605704741	605708211	IPR000719;IPR000742;IPR001245;IPR001881;IPR009030;IPR011009;IPR017441;IPR018097;IPR025287;IPR045274	Protein kinase domain;EGF-like domain;Serine-threonine/tyrosine-protein kinase, catalytic domain;EGF-like calcium-binding domain;Growth factor receptor cysteine-rich domain superfamily;Protein kinase-like domain superfamily;Protein kinase, ATP binding site;EGF-like calcium-binding, conserved site;Wall-associated receptor kinase, galacturonan-binding domain;Receptor-like kinase WAK-like	WAK
TraesCS3D02G527300	NA	3D	605708233	605710021	IPR025287	Wall-associated receptor kinase, galacturonan-binding domain	WAK
TraesCS3D02G527400	NA	3D	605953283	605956699	IPR000719;IPR000742;IPR001881;IPR008271;IPR009030;IPR011009;IPR017441;IPR018097;IPR025287;IPR045274;IPR049883	Protein kinase domain;EGF-like domain;EGF-like calcium-binding domain;Serine/threonine-protein kinase, active site;Growth factor receptor cysteine-rich domain superfamily;Protein kinase-like domain superfamily;Protein kinase, ATP binding site;EGF-like calcium-binding, conserved site;Wall-associated receptor kinase, galacturonan-binding domain;Receptor-like kinase WAK-like;NOTCH1 EGF-like calcium-…	WAK
TraesCS3D02G527500	NA	3D	605971468	605974837	IPR000719;IPR000742;IPR001881;IPR008271;IPR009030;IPR011009;IPR017441;IPR018097;IPR025287;IPR045274;IPR049883	Protein kinase domain;EGF-like domain;EGF-like calcium-binding domain;Serine/threonine-protein kinase, active site;Growth factor receptor cysteine-rich domain superfamily;Protein kinase-like domain superfamily;Protein kinase, ATP binding site;EGF-like calcium-binding, conserved site;Wall-associated receptor kinase, galacturonan-binding domain;Receptor-like kinase WAK-like;NOTCH1 EGF-like calcium-…	WAK
TraesCS3D02G527700	NA	3D	606077335	606081221	IPR002478;IPR004521;IPR015947;IPR016437;IPR041366	PUA domain;Uncharacterised domain CHP00451;PUA-like superfamily;MCT-1/Tma20;Pre-PUA domain	Other/Unknown
TraesCS3D02G527900	NA	3D	606295293	606301565	IPR000225;IPR003613;IPR011989;IPR013083;IPR016024;IPR045210	Armadillo;U-box domain;Armadillo-like helical;Zinc finger, RING/FYVE/PHD-type;Armadillo-type fold;PUB protein, U-box domain, plant	Other/Unknown
TraesCS3D02G528000	NA	3D	606313894	606319650	IPR002781	Transmembrane protein TauE-like	Other/Unknown
TraesCS3D02G528100	NA	3D	606341991	606352237	IPR002182;IPR003591;IPR027417;IPR032675;IPR036388;IPR041118;IPR055414	NB-ARC;Leucine-rich repeat, typical subtype;P-loop containing nucleoside triphosphate hydrolase;Leucine-rich repeat domain superfamily;Winged helix-like DNA-binding domain superfamily;Disease resistance, N-terminal;Disease resistance R13L4/SHOC-2-like, LRR domain	NB-LRR
TraesCS3D02G528200	NA	3D	606365049	606374602	IPR007122;IPR007123;IPR029006;IPR036180;IPR003128;IPR036886	Villin/Gelsolin;Gelsolin-like domain;ADF-H/Gelsolin-like domain superfamily;Gelsolin-like domain superfamily;Villin headpiece;Villin headpiece domain superfamily	Other/Unknown
TraesCS3D02G528300	NA	3D	606481227	606482583	IPR002182;IPR027417;IPR038005;IPR041118	NB-ARC;P-loop containing nucleoside triphosphate hydrolase;Virus X resistance protein-like, coiled-coil domain;Disease resistance, N-terminal	Other/Unknown
TraesCS3D02G528400	NA	3D	606599493	606600145	NA	NA	Other/Unknown
TraesCS3D02G528500	NA	3D	606602356	606605487	NA	NA	Other/Unknown
TraesCS3D02G528600	NA	3D	606608095	606612352	IPR001509;IPR036291;IPR045869;IPR050177	NAD-dependent epimerase/dehydratase;NAD(P)-binding domain superfamily;Bifunctional polymyxin resistance protein ArnA-like, extended (e) SDRs;Bifunctional lipid A modification and metabolic enzymes	Other/Unknown
TraesCS3D02G528700	NA	3D	606675841	606677025	IPR005174	KIB1-4, beta-propeller	Other/Unknown
TraesCS3D02G530800	Pr-1-12	3D	607168074	607168571	IPR001283;IPR014044;IPR035940	Cysteine-rich secretory protein-related;CAP domain;CAP superfamily	Other/Unknown
TraesCS3D02G528900	NA	3D	606775397	606775972	IPR025287	Wall-associated receptor kinase, galacturonan-binding domain	WAK
TraesCS3D02G529000	NA	3D	606796135	606796524	NA	NA	Other/Unknown
TraesCS3D02G529100	NA	3D	606857461	606863042	IPR004367;IPR006671;IPR013763;IPR036915;IPR039361;IPR046965	Cyclin, C-terminal domain;Cyclin, N-terminal;Cyclin-like domain;Cyclin-like superfamily;Cyclin;Cyclin A/B-like	Other/Unknown
TraesCS3D02G529200	NA	3D	606879666	606883546	IPR002885;IPR011990;IPR051114;IPR050667	Pentatricopeptide repeat;Tetratricopeptide-like helical domain superfamily;Mitochondrial RNA Processing CCM1;Pentatricopeptide repeat-containing protein	Other/Unknown
TraesCS3D02G529300	NA	3D	606887021	606889091	IPR002885;IPR011990;IPR046848;IPR046960	Pentatricopeptide repeat;Tetratricopeptide-like helical domain superfamily;E motif;Pentatricopeptide repeat-containing protein At4g14850-like, plant	Other/Unknown
TraesCS3D02G529400	NA	3D	606889871	606895123	IPR006109;IPR006168;IPR008927;IPR011128;IPR013328;IPR017751;IPR036291	Glycerol-3-phosphate dehydrogenase, NAD-dependent, C-terminal;Glycerol-3-phosphate dehydrogenase, NAD-dependent;6-phosphogluconate dehydrogenase-like, C-terminal domain superfamily;Glycerol-3-phosphate dehydrogenase, NAD-dependent, N-terminal;6-phosphogluconate dehydrogenase, domain 2;Glycerol-3-phosphate dehydrogenase, NAD-dependent, eukaryotic;NAD(P)-binding domain superfamily	Other/Unknown
TraesCS3D02G529500	NA	3D	606895958	606898302	IPR001199;IPR018506;IPR036400;IPR050668	Cytochrome b5-like heme/steroid binding domain;Cytochrome b5, heme-binding site;Cytochrome b5-like heme/steroid binding domain superfamily;Cytochrome b5	Other/Unknown
TraesCS3D02G529600	NA	3D	606905498	606909503	IPR036047	F-box-like domain superfamily	Other/Unknown
TraesCS3D02G529700	NA	3D	606912576	606914681	IPR005031;IPR023393	Coenzyme Q-binding protein COQ10, START domain;START-like domain superfamily	Other/Unknown
TraesCS3D02G531900	WPCL-D1	3D	607922801	607923646	IPR001005;IPR006447;IPR009057;IPR017930;IPR044841	SANT/Myb domain;Myb domain, plants;Homedomain-like superfamily;Myb domain;Transcription factor LUX/BOA-like	Other/Unknown
TraesCS3D02G529800	NA	3D	606928857	606931453	IPR040353	FLC EXPRESSOR/FLX-like	Other/Unknown
TraesCS3D02G529900	NA	3D	606948752	606950236	IPR005123;IPR026992;IPR027443;IPR044861;IPR050295	Oxoglutarate/iron-dependent dioxygenase domain;Non-haem dioxygenase N-terminal domain;Isopenicillin N synthase-like superfamily;Isopenicillin N synthase-like, Fe(2+) 2OG dioxygenase domain;Plant 2-oxoglutarate-dependent oxidoreductases	Other/Unknown
TraesCS3D02G530000	NA	3D	606995302	607004223	IPR000197;IPR000433;IPR001965;IPR011011;IPR013083;IPR013178;IPR019786;IPR031162;IPR035898	Zinc finger, TAZ-type;Zinc finger, ZZ-type;Zinc finger, PHD-type;Zinc finger, FYVE/PHD-type;Zinc finger, RING/FYVE/PHD-type;Histone acetyltransferase Rtt109/CBP;Zinc finger, PHD-type, conserved site;CBP/p300-type histone acetyltransferase domain;TAZ domain superfamily	Other/Unknown
TraesCS3D02G530100	NA	3D	607011615	607013183	NA	NA	Other/Unknown
TraesCS3D02G530200	NA	3D	607060198	607063522	IPR007877	Protein of unknown function DUF707	Other/Unknown
TraesCS3D02G530300	NA	3D	607063618	607066211	IPR008598;IPR027935;IPR033347	Drought induced 19 protein type, zinc-binding domain;Protein dehydration-induced 19, C-terminal;Protein DEHYDRATION-INDUCED 19	Other/Unknown
TraesCS3D02G530400	NA	3D	607067263	607068609	IPR004776;IPR039305	Membrane transport PIN-like;Protein PIN-LIKES 2/6	Other/Unknown
TraesCS3D02G530500	NA	3D	607087987	607093493	IPR002885;IPR011990;IPR044578	Pentatricopeptide repeat;Tetratricopeptide-like helical domain superfamily;Pentatricopeptide repeat-containing protein BIR6-like	Other/Unknown
TraesCS3D02G530600	NA	3D	607094510	607098157	IPR001650;IPR011545;IPR014001;IPR027417;IPR050547	Helicase, C-terminal domain-like;DEAD/DEAH box helicase domain;Helicase superfamily 1/2, ATP-binding domain;P-loop containing nucleoside triphosphate hydrolase;DEAD box ATP-dependent RNA helicases	Other/Unknown
TraesCS3D02G530700	NA	3D	607097794	607101353	IPR003194;IPR009083;IPR009088;IPR015871;IPR015872	Transcription initiation factor IIA, gamma subunit;Transcription factor IIA, alpha-helical domain;Transcription factor IIA, beta-barrel;Transcription initiation factor IIA, gamma subunit, C-terminal;Transcription initiation factor IIA, gamma subunit, N-terminal	Other/Unknown
TraesCS3D02G530900	NA	3D	607205679	607207863	IPR003194;IPR009083;IPR009088;IPR015871;IPR015872	Transcription initiation factor IIA, gamma subunit;Transcription factor IIA, alpha-helical domain;Transcription factor IIA, beta-barrel;Transcription initiation factor IIA, gamma subunit, C-terminal;Transcription initiation factor IIA, gamma subunit, N-terminal	Other/Unknown
TraesCS3D02G531000	NA	3D	607224654	607226097	IPR003194;IPR009083;IPR009088;IPR015871;IPR015872	Transcription initiation factor IIA, gamma subunit;Transcription factor IIA, alpha-helical domain;Transcription factor IIA, beta-barrel;Transcription initiation factor IIA, gamma subunit, C-terminal;Transcription initiation factor IIA, gamma subunit, N-terminal	Other/Unknown
TraesCS3D02G531100	NA	3D	607232365	607234578	IPR007658;IPR025315	Protein of unknown function DUF594;Domain of unknown function DUF4220	Other/Unknown
TraesCS3D02G531200	NA	3D	607309149	607313924	IPR040353	FLC EXPRESSOR/FLX-like	Other/Unknown
TraesCS3D02G531300	NA	3D	607379708	607379983	NA	NA	Other/Unknown
TraesCS3D02G531400	NA	3D	607514506	607516905	NA	NA	Other/Unknown
TraesCS3D02G531500	NA	3D	607551535	607552842	IPR006121;IPR036163;IPR044526	Heavy metal-associated domain, HMA;Heavy metal-associated domain superfamily;Protein SODIUM POTASSIUM ROOT DEFECTIVE 1-3	Other/Unknown
TraesCS3D02G531600	NA	3D	607665585	607667539	IPR006044;IPR006045;IPR011051;IPR014710;IPR050253	11-S seed storage protein, plant;Cupin 1;RmlC-like cupin domain superfamily;RmlC-like jelly roll fold;Seed Storage and Functional Proteins	Other/Unknown
TraesCS3D02G531700	NA	3D	607868805	607876517	IPR001611;IPR002182;IPR027417;IPR032675;IPR036388;IPR041118;IPR042197;IPR055414;IPR056789	Leucine-rich repeat;NB-ARC;P-loop containing nucleoside triphosphate hydrolase;Leucine-rich repeat domain superfamily;Winged helix-like DNA-binding domain superfamily;Disease resistance, N-terminal;Apoptotic protease-activating factors, helical domain;Disease resistance R13L4/SHOC-2-like, LRR domain;R13L1/DRL21-like, LRR repeat region	NB-LRR
TraesCS3D02G531800	NA	3D	607899028	607899500	NA	NA	Other/Unknown
TraesCS3D02G532000	NA	3D	607978126	607985378	IPR031307;IPR032308	Ninja family;Tify domain-binding domain	Other/Unknown
TraesCS3D02G532100	NA	3D	608065869	608072715	IPR001313;IPR011989;IPR012940;IPR016024;IPR033133;IPR033712	Pumilio RNA-binding repeat;Armadillo-like helical;Nucleic acid binding NABP;Armadillo-type fold;Pumilio homology domain;Pumilio, RNA binding domain	Other/Unknown
TraesCS3D02G532200	NA	3D	608332482	608333816	IPR005174	KIB1-4, beta-propeller	Other/Unknown
TraesCS3D02G532300	NA	3D	608400960	608402494	IPR001841;IPR010543;IPR013083;IPR039525	Zinc finger, RING-type;Domain of unknown function DUF1117;Zinc finger, RING/FYVE/PHD-type;E3 ubiquitin-protein ligase RNF126-like, zinc-ribbon	Other/Unknown
TraesCS3D02G532400	NA	3D	608405835	608407324	IPR003689	Zinc/iron permease	Other/Unknown
TraesCS3D02G532500	NA	3D	608432490	608432970	IPR010666	Zinc finger, GRF-type	Other/Unknown
TraesCS3D02G532600	NA	3D	608453875	608455065	IPR001810;IPR017451;IPR036047	F-box domain;F-box associated interaction domain;F-box-like domain superfamily	Other/Unknown
TraesCS3D02G532700	NA	3D	608511239	608512270	IPR012552;IPR051525	DVL;DVL/RTFL regulatory polypeptides	Other/Unknown
TraesCS3D02G532800	NA	3D	608667799	608670344	IPR003657;IPR036576;IPR044810	WRKY domain;WRKY domain superfamily;WRKY transcription factor, plant	Other/Unknown
TraesCS3D02G532900	NA	3D	608748605	608749473	IPR002100;IPR036879	Transcription factor, MADS-box;Transcription factor, MADS-box superfamily	Other/Unknown
TraesCS3D02G533000	NA	3D	608774841	608778486	IPR001680;IPR015943;IPR019775;IPR033010;IPR036322;IPR056150	WD40 repeat;WD40/YVTN repeat-like-containing domain superfamily;WD40 repeat, conserved site;WD repeat Cdc20/Fizzy;WD40-repeat-containing domain superfamily;CDC20/Fizzy, WD40 domain	Other/Unknown
TraesCS3D02G533100	NA	3D	608924067	608931731	IPR000152;IPR000719;IPR000742;IPR001245;IPR001881;IPR008271;IPR011009;IPR017441;IPR018097;IPR025287;IPR045274;IPR049883	EGF-type aspartate/asparagine hydroxylation site;Protein kinase domain;EGF-like domain;Serine-threonine/tyrosine-protein kinase, catalytic domain;EGF-like calcium-binding domain;Serine/threonine-protein kinase, active site;Protein kinase-like domain superfamily;Protein kinase, ATP binding site;EGF-like calcium-binding, conserved site;Wall-associated receptor kinase, galacturonan-binding domain;Re…	WAK
TraesCS3D02G533200	NA	3D	608950841	608953333	IPR001128;IPR002401;IPR017972;IPR036396	Cytochrome P450;Cytochrome P450, E-class, group I;Cytochrome P450, conserved site;Cytochrome P450 superfamily	Other/Unknown
TraesCS3D02G533300	NA	3D	608981203	609006658	IPR001128;IPR002401;IPR017972;IPR036396;IPR050193	Cytochrome P450;Cytochrome P450, E-class, group I;Cytochrome P450, conserved site;Cytochrome P450 superfamily;Plant Cytochrome P450 71	Other/Unknown
TraesCS3D02G533400	NA	3D	609024334	609025064	NA	NA	Other/Unknown
TraesCS3D02G533500	NA	3D	609072327	609076435	IPR002110;IPR026961;IPR036770	Ankyrin repeat;PGG domain;Ankyrin repeat-containing domain superfamily	Other/Unknown
TraesCS3D02G533600	NA	3D	609079926	609084694	IPR002885;IPR011990;IPR046848;IPR046960	Pentatricopeptide repeat;Tetratricopeptide-like helical domain superfamily;E motif;Pentatricopeptide repeat-containing protein At4g14850-like, plant	Other/Unknown
TraesCS3D02G533700	NA	3D	609085067	609089845	IPR001005;IPR009057;IPR017930;IPR029071;IPR031105	SANT/Myb domain;Homedomain-like superfamily;Myb domain;Ubiquitin-like domain superfamily;Telomere repeat-binding protein, plant	Other/Unknown
TraesCS3D02G533800	NA	3D	609104271	609107164	IPR010742;IPR029008	Respirasome Complex Assembly Factor 1;ER membrane protein complex subunit 6-like	Other/Unknown
TraesCS3D02G533900	NA	3D	609119880	609120976	NA	NA	Other/Unknown
TraesCS3D02G534000	NA	3D	609123182	609125575	IPR006439;IPR010237;IPR023214;IPR036412;IPR041492	HAD hydrolase, subfamily IA;Pyrimidine 5-nucleotidase;HAD superfamily;HAD-like superfamily;Haloacid dehalogenase-like hydrolase	Other/Unknown
TraesCS3D02G534100	NA	3D	609166173	609171927	IPR001096;IPR043577;IPR046427;IPR048501	Peptidase C13, legumain;Asparaginyl endopeptidase;Legumain prodomain superfamily;Legumain, prodomain	Other/Unknown
TraesCS3D02G534200	NA	3D	609212443	609217259	IPR001096;IPR043577;IPR046427;IPR048501	Peptidase C13, legumain;Asparaginyl endopeptidase;Legumain prodomain superfamily;Legumain, prodomain	Other/Unknown
TraesCS3D02G534300	NA	3D	609232037	609237109	IPR001810;IPR032675;IPR036047;IPR053197;IPR053781	F-box domain;Leucine-rich repeat domain superfamily;F-box-like domain superfamily;F-box/SCF ubiquitin ligase complex component;F-box/LRR-repeat protein 13-like, F-box domain	RLP
TraesCS3D02G534400	NA	3D	609239693	609241359	IPR000070;IPR011050;IPR012334	Pectinesterase, catalytic;Pectin lyase fold/virulence factor;Pectin lyase fold	Other/Unknown
TraesCS3D02G534500	NA	3D	609285404	609287257	IPR001128;IPR002401;IPR017972;IPR036396	Cytochrome P450;Cytochrome P450, E-class, group I;Cytochrome P450, conserved site;Cytochrome P450 superfamily	Other/Unknown
TraesCS3D02G534600	NA	3D	609289222	609292485	IPR002110;IPR026961;IPR036770	Ankyrin repeat;PGG domain;Ankyrin repeat-containing domain superfamily	Other/Unknown
TraesCS3D02G534700	NA	3D	609328407	609330047	IPR010666	Zinc finger, GRF-type	Other/Unknown
TraesCS3D02G534800	NA	3D	609363822	609365267	IPR002213;IPR035595;IPR050481	UDP-glucuronosyl/UDP-glucosyltransferase;UDP-glycosyltransferase family, conserved site;UDP-glycosyltransferase, plant-type	Other/Unknown
TraesCS3D02G534900	NA	3D	609371594	609374829	IPR000719;IPR001611;IPR003591;IPR008271;IPR011009;IPR032675;IPR050647	Protein kinase domain;Leucine-rich repeat;Leucine-rich repeat, typical subtype;Serine/threonine-protein kinase, active site;Protein kinase-like domain superfamily;Leucine-rich repeat domain superfamily;Plant LRR receptor-like serine/threonine-protein kinases	LRR-RLK
TraesCS3D02G535000	NA	3D	609498116	609500120	IPR000073;IPR029058;IPR052370	Alpha/beta hydrolase fold-1;Alpha/Beta hydrolase fold;Meta-cleavage pathway hydrolase	Other/Unknown
TraesCS3D02G535100	NA	3D	609585080	609590719	IPR002110;IPR026961;IPR036770	Ankyrin repeat;PGG domain;Ankyrin repeat-containing domain superfamily	Other/Unknown
TraesCS3D02G535200	NA	3D	609606901	609610251	IPR013255;IPR045143	Chromosome segregation protein Spc25, C-terminal;Kinetochore protein Spc25	Other/Unknown
TraesCS3D02G535300	NA	3D	609615683	609618222	IPR032675;IPR038005;IPR041118;IPR055414	Leucine-rich repeat domain superfamily;Virus X resistance protein-like, coiled-coil domain;Disease resistance, N-terminal;Disease resistance R13L4/SHOC-2-like, LRR domain	RLP
TraesCS3D02G535400	NA	3D	609619263	609627060	IPR002553;IPR011989;IPR016024;IPR026739;IPR026740;IPR029390	Clathrin/coatomer adaptor, adaptin-like, N-terminal;Armadillo-like helical;Armadillo-type fold;AP complex subunit beta;AP-3 complex subunit beta;AP-3 complex subunit beta, C-terminal domain	Other/Unknown
TraesCS3D02G535500	NA	3D	609627221	609628618	IPR003441;IPR036093	NAC domain;NAC domain superfamily	Other/Unknown
TraesCS3D02G535600	NA	3D	609704317	609707202	IPR004383;IPR006638;IPR007197;IPR013785;IPR027492;IPR040072	Ribosomal RNA large subunit methyltransferase RlmN/Cfr;Elp3/MiaA/NifB-like, radical SAM core domain;Radical SAM;Aldolase-type TIM barrel;Dual-specificity RNA methyltransferase RlmN;Methyltransferase (Class A)	Other/Unknown
TraesCS3D02G535700	NA	3D	609738165	609742070	IPR000719;IPR001245;IPR008271;IPR011009;IPR017441;IPR050823	Protein kinase domain;Serine-threonine/tyrosine-protein kinase, catalytic domain;Serine/threonine-protein kinase, active site;Protein kinase-like domain superfamily;Protein kinase, ATP binding site;Plant Serine/Threonine-Protein Kinase	RLK-other
TraesCS3D02G535900	NA	3D	609928529	609930742	IPR000289;IPR012340;IPR028626	Ribosomal protein S28e;Nucleic acid-binding, OB-fold;Ribosomal protein eS28 conserved site	Other/Unknown
TraesCS3D02G536000	NA	3D	609931866	609943127	IPR012416;IPR046829;IPR046830;IPR046831	CALMODULIN-BINDING PROTEIN60;Calmodulin binding protein, C-terminal domain;Calmodulin binding protein, central domain;Calmodulin binding protein-like, N-terminal domain	Other/Unknown
TraesCS3D02G536100	NA	3D	610061063	610062335	NA	NA	Other/Unknown
TraesCS3D02G536200	NA	3D	610072809	610075421	IPR006502	Protein of unknown function PDDEXK-like	Other/Unknown
TraesCS3D02G536300	NA	3D	610138928	610139688	IPR000347	Metallothionein, family 15, plant	Other/Unknown
TraesCS3D02G536400	NA	3D	610157754	610161298	IPR008570;IPR014041;IPR036388;IPR036390	ESCRT-II complex, Vps25 subunit;ESCRT-II complex, Vps25 subunit, N-terminal winged helix;Winged helix-like DNA-binding domain superfamily;Winged helix DNA-binding domain superfamily	Other/Unknown
TraesCS3D02G536500	NA	3D	610166124	610168198	IPR006044;IPR006045;IPR011051;IPR014710;IPR050253	11-S seed storage protein, plant;Cupin 1;RmlC-like cupin domain superfamily;RmlC-like jelly roll fold;Seed Storage and Functional Proteins	Other/Unknown
TraesCS3D02G536600	NA	3D	610186917	610187265	IPR000347	Metallothionein, family 15, plant	Other/Unknown
TraesCS3D02G536700	NA	3D	610190340	610190684	IPR000347	Metallothionein, family 15, plant	Other/Unknown
TraesCS3D02G536800	NA	3D	610194003	610194337	NA	NA	Other/Unknown
TraesCS3D02G536900	NA	3D	610199565	610201683	IPR000266;IPR012340;IPR019984	Ribosomal protein S17/S11;Nucleic acid-binding, OB-fold;30S ribosomal protein S17	Other/Unknown
TraesCS3D02G537000	NA	3D	610207141	610207810	IPR002222;IPR005732;IPR020934;IPR023575	Ribosomal protein S19/S15;Ribosomal protein S19, bacterial-type;Small ribosomal subunit protein uS19, conserved site;Small ribosomal subunit protein uS19, superfamily	Other/Unknown
TraesCS3D02G537100	NA	3D	610345970	610357986	NA	NA	Other/Unknown
TraesCS3D02G537200	NA	3D	610359653	610359820	IPR052867	Mitochondrial ATP Synthase Subunit 6	Other/Unknown
TraesCS3D02G537300	NA	3D	610428994	610431440	IPR007482	Protein-tyrosine phosphatase-like, PTPLA	Other/Unknown
TraesCS3D02G537400	NA	3D	610543334	610545124	IPR003851;IPR045174	Zinc finger, Dof-type;Dof zinc finger protein	Other/Unknown
TraesCS3D02G537500	NA	3D	610627454	610629359	IPR003851;IPR045174	Zinc finger, Dof-type;Dof zinc finger protein	Other/Unknown
TraesCS3D02G537600	NA	3D	610793588	610794336	IPR027858	Protein BRAWNIN	Other/Unknown

## Sheet: Supplementary Table S5
Supplementary Table S5. Gene content of the qSTB-1B.1 interval based on the IWGSC RefSeq v.1.1 wheat genome annotation.
RefSeq v1.1 GeneID	Gene Name	Chromosome	Start Position	End Position	Interpro ID	Interpro Description	Gene Type
TraesCS1B02G048800	NA	1B	28561964	28564707	NA	NA	Other/Unknown
TraesCS1B02G048900	NA	1B	28626101	28626916	IPR002119;IPR007125;IPR009072;IPR032454;IPR032458	Histone H2A;Histone H2A/H2B/H3;Histone-fold;Histone H2A, C-terminal domain;Histone H2A conserved site	Other/Unknown
TraesCS1B02G049000	NA	1B	28710689	28711262	IPR022618	Defensin-like protein 20-28	Other/Unknown
TraesCS1B02G049100	NA	1B	28762792	28763678	IPR002119;IPR007125;IPR009072;IPR032454;IPR032458	Histone H2A;Histone H2A/H2B/H3;Histone-fold;Histone H2A, C-terminal domain;Histone H2A conserved site	Other/Unknown
TraesCS1B02G049200	NA	1B	28764434	28767794	IPR008162;IPR036649	Inorganic pyrophosphatase;Inorganic pyrophosphatase superfamily	Other/Unknown
TraesCS1B02G049300	NA	1B	28810569	28824577	IPR001357;IPR001510;IPR004102;IPR008288;IPR008893;IPR012317;IPR012982;IPR036420;IPR036616;IPR036930;IPR036957;IPR038650;IPR049296;IPR050800	BRCT domain;Zinc finger, PARP-type;Poly(ADP-ribose) polymerase, regulatory domain;Poly [ADP-ribose] polymerase;WGR domain;Poly(ADP-ribose) polymerase, catalytic domain;PARP1-like, PADR1 domain, zinc ribbon fold;BRCT domain superfamily;Poly(ADP-ribose) polymerase, regulatory domain superfamily;WGR domain superfamily;Zinc finger, PARP-type superfamily;PADR1, C-terminal domain superfamily;PARP1-like…	Other/Unknown
TraesCS1B02G049400	NA	1B	29085970	29102991	IPR002182;IPR027417;IPR032675;IPR036388;IPR042197;IPR056789	NB-ARC;P-loop containing nucleoside triphosphate hydrolase;Leucine-rich repeat domain superfamily;Winged helix-like DNA-binding domain superfamily;Apoptotic protease-activating factors, helical domain;R13L1/DRL21-like, LRR repeat region	NB-LRR
TraesCS1B02G049500	NA	1B	29263122	29268093	IPR000620;IPR030184	EamA domain;WAT1-related protein	Other/Unknown
TraesCS1B02G049600	NA	1B	29393691	29395228	IPR002213;IPR050481	UDP-glucuronosyl/UDP-glucosyltransferase;UDP-glycosyltransferase, plant-type	Other/Unknown
TraesCS1B02G049700	NA	1B	29401254	29406888	IPR001005;IPR009057;IPR010588;IPR015495;IPR017930	SANT/Myb domain;Homedomain-like superfamily;Myb-related protein P/transcription factor Y1, C-terminal;Myb transcription factor, plants;Myb domain	Other/Unknown
TraesCS1B02G049800	NA	1B	29491770	29492937	IPR002935;IPR029063;IPR050362	Class I-like SAM-dependent O-methyltransferase;S-adenosyl-L-methionine-dependent methyltransferase superfamily;Cation-dependent O-methyltransferase	Other/Unknown
TraesCS1B02G049900	NA	1B	29823225	29828490	IPR001611;IPR002182;IPR027417;IPR032675;IPR036388;IPR041118;IPR042197;IPR056789	Leucine-rich repeat;NB-ARC;P-loop containing nucleoside triphosphate hydrolase;Leucine-rich repeat domain superfamily;Winged helix-like DNA-binding domain superfamily;Disease resistance, N-terminal;Apoptotic protease-activating factors, helical domain;R13L1/DRL21-like, LRR repeat region	NB-LRR
TraesCS1B02G050000	NA	1B	29898396	29900138	IPR002182;IPR027417;IPR036388;IPR041118;IPR042197	NB-ARC;P-loop containing nucleoside triphosphate hydrolase;Winged helix-like DNA-binding domain superfamily;Disease resistance, N-terminal;Apoptotic protease-activating factors, helical domain	Other/Unknown
TraesCS1B02G050100	NA	1B	29923154	29931444	IPR000152;IPR000719;IPR000742;IPR001245;IPR001881;IPR008271;IPR011009;IPR017441;IPR018097;IPR025287;IPR045274;IPR049883	EGF-type aspartate/asparagine hydroxylation site;Protein kinase domain;EGF-like domain;Serine-threonine/tyrosine-protein kinase, catalytic domain;EGF-like calcium-binding domain;Serine/threonine-protein kinase, active site;Protein kinase-like domain superfamily;Protein kinase, ATP binding site;EGF-like calcium-binding, conserved site;Wall-associated receptor kinase, galacturonan-binding domain;Re…	WAK
TraesCS1B02G050200	NA	1B	30393964	30397094	IPR001841;IPR002110;IPR013083;IPR036770;IPR051573;IPR056760	Zinc finger, RING-type;Ankyrin repeat;Zinc finger, RING/FYVE/PHD-type;Ankyrin repeat-containing domain superfamily;Ankyrin repeat and SOCS box domain-containing protein;E3 ubiquitin-protein ligase XB3-like, RING finger	Other/Unknown
TraesCS1B02G050300	NA	1B	30530310	30531153	NA	NA	Other/Unknown
TraesCS1B02G050400	NA	1B	30543633	30547236	IPR000008;IPR001736;IPR011402;IPR015679;IPR024632;IPR035892	C2 domain;Phospholipase D/Transphosphatidylase;Phospholipase D, plant;Phospholipase D family;Phospholipase D, C-terminal;C2 domain superfamily	Other/Unknown
TraesCS1B02G050500	NA	1B	30723311	30726962	IPR007573	QWRF family	Other/Unknown
TraesCS1B02G050600	NA	1B	30730083	30731757	IPR003386;IPR029058	Lecithin:cholesterol/phospholipid:diacylglycerol acyltransferase;Alpha/Beta hydrolase fold	Other/Unknown
TraesCS1B02G050700	NA	1B	30796056	30797339	NA	NA	Other/Unknown
TraesCS1B02G050800	NA	1B	30844359	30845297	IPR000210;IPR002083;IPR008974;IPR011333;IPR045005	BTB/POZ domain;MATH/TRAF domain;TRAF-like;SKP1/BTB/POZ domain superfamily;BTB/POZ and MATH domain-containing protein 1-6	Other/Unknown
TraesCS1B02G050900	NA	1B	30846307	30847158	IPR001128;IPR002403;IPR017972;IPR036396;IPR050529	Cytochrome P450;Cytochrome P450, E-class, group IV;Cytochrome P450, conserved site;Cytochrome P450 superfamily;Cytochrome P450, sterol 14-alpha demethylase	Other/Unknown
TraesCS1B02G051000	NA	1B	30847183	30847674	IPR001128;IPR036396;IPR050529	Cytochrome P450;Cytochrome P450 superfamily;Cytochrome P450, sterol 14-alpha demethylase	Other/Unknown
TraesCS1B02G051100	NA	1B	30879167	30883218	IPR015943;IPR036322	WD40/YVTN repeat-like-containing domain superfamily;WD40-repeat-containing domain superfamily	Other/Unknown
TraesCS1B02G051200	NA	1B	31125242	31125556	IPR041118	Disease resistance, N-terminal	Other/Unknown
TraesCS1B02G051300	NA	1B	31125652	31127538	IPR001496;IPR001611;IPR002182;IPR027417;IPR032675;IPR036388;IPR042197;IPR055414	SOCS box domain;Leucine-rich repeat;NB-ARC;P-loop containing nucleoside triphosphate hydrolase;Leucine-rich repeat domain superfamily;Winged helix-like DNA-binding domain superfamily;Apoptotic protease-activating factors, helical domain;Disease resistance R13L4/SHOC-2-like, LRR domain	NB-LRR
TraesCS1B02G051600	NA	1B	31856704	31860904	;IPR003340;IPR015300	;B3 DNA binding domain;DNA-binding pseudobarrel domain superfamily	Other/Unknown
TraesCS1B02G051700	NA	1B	31891343	31905314	IPR036890;IPR041006;IPR045261	Histidine kinase/HSP90-like ATPase superfamily;Morc, S5 domain 2-like;MICRORCHIDIA ATPase family	Other/Unknown
TraesCS1B02G051800	NA	1B	31967260	31970311	IPR000537;IPR006369;IPR044878	UbiA prenyltransferase;Protohaem IX farnesyltransferase;UbiA prenyltransferase superfamily	Other/Unknown
TraesCS1B02G051900	NA	1B	32058956	32062010	IPR000537;IPR006369;IPR044878	UbiA prenyltransferase;Protohaem IX farnesyltransferase;UbiA prenyltransferase superfamily	Other/Unknown
TraesCS1B02G052000	NA	1B	32129189	32129530	NA	NA	Other/Unknown
TraesCS1B02G052100	NA	1B	32375303	32380677	IPR000300;IPR036691;IPR045849	Inositol polyphosphate-related phosphatase;Endonuclease/exonuclease/phosphatase superfamily;Inositol polyphosphate 5-phosphatase, plant	Other/Unknown
TraesCS1B02G052200	NA	1B	32587208	32589758	IPR007658;IPR018247;IPR025315	Protein of unknown function DUF594;EF-Hand 1, calcium-binding site;Domain of unknown function DUF4220	Other/Unknown
TraesCS1B02G052283	NA	1B	32592268	32593185	IPR002885;IPR011990;IPR046848;IPR046960	Pentatricopeptide repeat;Tetratricopeptide-like helical domain superfamily;E motif;Pentatricopeptide repeat-containing protein At4g14850-like, plant	Other/Unknown
TraesCS1B02G052300	NA	1B	32593207	32594664	IPR002885;IPR011990;IPR046960	Pentatricopeptide repeat;Tetratricopeptide-like helical domain superfamily;Pentatricopeptide repeat-containing protein At4g14850-like, plant	Other/Unknown
TraesCS1B02G052400	NA	1B	32761008	32769476	IPR007205;IPR007206;IPR011989;IPR016024;IPR039717	Protein HGH1 N-terminal;Protein HGH1 C-terminal;Armadillo-like helical;Armadillo-type fold;Protein Hgh1	Other/Unknown

## Sheet: Supplementary Table S6
Supplementary Table S6. Gene content of the qSTB-6D.1 interval based on the IWGSC RefSeq v.1.1 wheat genome annotation.
RefSeq v1.1 GeneID	Gene Name	Chromosome	Start Position	End Position	Interpro ID	Interpro Description	Gene Type
TraesCS6D02G053000	NA	6D	25614969	25616657	NA	NA	Other/Unknown
TraesCS6D02G053100	NA	6D	25633070	25637115	IPR000210;IPR011333	BTB/POZ domain;SKP1/BTB/POZ domain superfamily	Other/Unknown
TraesCS6D02G053200	NA	6D	25639757	25642631	IPR032675;IPR036047;IPR053772;IPR055357	Leucine-rich repeat domain superfamily;F-box-like domain superfamily;FBD-associated F-box protein At1g61320/At1g61330-like;At1g61320/AtMIF1, LRR domain	RLP
TraesCS6D02G053300	NA	6D	25647000	25650222	IPR032675;IPR036047;IPR053772;IPR055357	Leucine-rich repeat domain superfamily;F-box-like domain superfamily;FBD-associated F-box protein At1g61320/At1g61330-like;At1g61320/AtMIF1, LRR domain	RLP
TraesCS6D02G053400	NA	6D	25660649	25665598	IPR029058;IPR045550;IPR001375;IPR002471	Alpha/Beta hydrolase fold;Acylamino-acid-releasing enzyme, N-terminal domain;Peptidase S9, prolyl oligopeptidase, catalytic domain;Peptidase S9, serine active site	Other/Unknown
TraesCS6D02G053500	NA	6D	25689426	25693177	IPR005516	Remorin, C-terminal	Other/Unknown
TraesCS6D02G053600	NA	6D	25694571	25695731	IPR005574;IPR006590;IPR010997;IPR038324;IPR045222	RNA polymerase subunit Rpb4/RPC9;RNA polymerase Rpb4/RPC9, core;HRDC-like superfamily;Rpb4/RPC9 superfamily;DNA-directed RNA polymerase II subunit Rpb4-like	Other/Unknown
TraesCS6D02G053700	NA	6D	25705818	25706721	NA	NA	Other/Unknown
TraesCS6D02G053800	NA	6D	25727863	25730967	IPR005301;IPR036703	MOB kinase activator family;MOB kinase activator superfamily	Other/Unknown
TraesCS6D02G053900	NA	6D	25731684	25733112	NA	NA	Other/Unknown
TraesCS6D02G054000	NA	6D	25747398	25749842	IPR005301;IPR036703	MOB kinase activator family;MOB kinase activator superfamily	Other/Unknown
TraesCS6D02G054100	NA	6D	25756588	25760739	IPR018962;IPR044687	Domain of unknown function DUF1995;Protein LOW PSII ACCUMULATION 3	Other/Unknown
TraesCS6D02G054200	NA	6D	25762027	25762290	NA	NA	Other/Unknown
TraesCS6D02G054300	NA	6D	25781004	25784321	IPR001674;IPR004739;IPR014729;IPR017926;IPR022955;IPR025777;IPR029062	GMP synthase, C-terminal;GMP synthase, glutamine amidotransferase;Rossmann-like alpha/beta/alpha sandwich fold;Glutamine amidotransferase;GMP synthase;GMP synthetase ATP pyrophosphatase domain;Class I glutamine amidotransferase-like	Other/Unknown
TraesCS6D02G054400	NA	6D	25803688	25805179	IPR000823;IPR002016;IPR010255;IPR019793;IPR019794;IPR033905	Plant peroxidase;Haem peroxidase;Haem peroxidase superfamily;Peroxidases heam-ligand binding site;Peroxidase, active site;Secretory peroxidase	Other/Unknown
TraesCS6D02G054500	NA	6D	25826148	25827680	IPR000823;IPR002016;IPR010255;IPR019793;IPR019794;IPR033905	Plant peroxidase;Haem peroxidase;Haem peroxidase superfamily;Peroxidases heam-ligand binding site;Peroxidase, active site;Secretory peroxidase	Other/Unknown
TraesCS6D02G054600	NA	6D	25850981	25852719	IPR000823;IPR002016;IPR010255;IPR019793;IPR019794;IPR033905	Plant peroxidase;Haem peroxidase;Haem peroxidase superfamily;Peroxidases heam-ligand binding site;Peroxidase, active site;Secretory peroxidase	Other/Unknown
TraesCS6D02G054700	NA	6D	25858275	25858819	NA	NA	Other/Unknown
TraesCS6D02G054800	NA	6D	25878792	25880181	IPR000823;IPR002016;IPR010255;IPR019793;IPR019794;IPR033905	Plant peroxidase;Haem peroxidase;Haem peroxidase superfamily;Peroxidases heam-ligand binding site;Peroxidase, active site;Secretory peroxidase	Other/Unknown
TraesCS6D02G054900	NA	6D	25914891	25916529	IPR000823;IPR002016;IPR010255;IPR019793;IPR019794;IPR033905	Plant peroxidase;Haem peroxidase;Haem peroxidase superfamily;Peroxidases heam-ligand binding site;Peroxidase, active site;Secretory peroxidase	Other/Unknown
TraesCS6D02G055000	NA	6D	25952730	25953254	IPR006501;IPR034088;IPR035513	Pectinesterase inhibitor domain;Pla a 1-like;Invertase/pectin methylesterase inhibitor domain superfamily	Other/Unknown
TraesCS6D02G055100	NA	6D	26002087	26003031	IPR005202	Transcription factor GRAS	Other/Unknown
TraesCS6D02G055200	NA	6D	26242125	26245428	IPR021852;IPR042415	Domain of unknown function DUF3456;Protein canopy homolog	Other/Unknown
TraesCS6D02G055300	NA	6D	26249669	26252568	IPR001810;IPR036047;IPR056594	F-box domain;F-box-like domain superfamily;F-box protein AT5G49610-like, beta-propeller domain	Other/Unknown
TraesCS6D02G055400	NA	6D	26254487	26256730	IPR001380;IPR018256	Large ribosomal subunit protein eL13;Large ribosomal subunit protein eL13, conserved site	Other/Unknown
TraesCS6D02G055500	NA	6D	26350315	26352137	IPR005175;IPR014476	PPC domain;AT-hook motif nuclear-localized protein 15-29	Other/Unknown
TraesCS6D02G055600	NA	6D	26359612	26368854	IPR006073;IPR010674;IPR027417;IPR030389;IPR041623;	GTP binding domain;Nucleolar GTP-binding protein 1, Rossman-fold domain;P-loop containing nucleoside triphosphate hydrolase;FeoB-type guanine nucleotide-binding (G) domain;NOG1, N-terminal helical domain;	Other/Unknown
TraesCS6D02G055700	NA	6D	26516091	26517570	IPR001810;IPR011044;IPR036047;IPR056594	F-box domain;Quinoprotein amine dehydrogenase, beta chain-like;F-box-like domain superfamily;F-box protein AT5G49610-like, beta-propeller domain	Other/Unknown
TraesCS6D02G055900	NA	6D	26750495	26751757	IPR023213;IPR050898	Chloramphenicol acetyltransferase-like domain superfamily;Plant acyltransferase	Other/Unknown
TraesCS6D02G056000	NA	6D	26755471	26761458	IPR001810;IPR036047	F-box domain;F-box-like domain superfamily	Other/Unknown
TraesCS6D02G056100	NA	6D	26815448	26817069	IPR001810;IPR036047;IPR056594	F-box domain;F-box-like domain superfamily;F-box protein AT5G49610-like, beta-propeller domain	Other/Unknown
TraesCS6D02G056200	NA	6D	26859266	26860817	IPR001810;IPR036047;IPR056594	F-box domain;F-box-like domain superfamily;F-box protein AT5G49610-like, beta-propeller domain	Other/Unknown
TraesCS6D02G056300	NA	6D	27026824	27030521	IPR056594	F-box protein AT5G49610-like, beta-propeller domain	Other/Unknown
TraesCS6D02G056400	NA	6D	27031651	27032841	IPR001810;IPR036047;IPR056594	F-box domain;F-box-like domain superfamily;F-box protein AT5G49610-like, beta-propeller domain	Other/Unknown
TraesCS6D02G056500	NA	6D	27045087	27045818	NA	NA	Other/Unknown
TraesCS6D02G056600	NA	6D	27056856	27059250	IPR000719;IPR000742;IPR001245;IPR001881;IPR008271;IPR009030;IPR011009;IPR017441;IPR025287;IPR045274;IPR049883	Protein kinase domain;EGF-like domain;Serine-threonine/tyrosine-protein kinase, catalytic domain;EGF-like calcium-binding domain;Serine/threonine-protein kinase, active site;Growth factor receptor cysteine-rich domain superfamily;Protein kinase-like domain superfamily;Protein kinase, ATP binding site;Wall-associated receptor kinase, galacturonan-binding domain;Receptor-like kinase WAK-like;NOTCH1…	WAK
TraesCS6D02G056700	NA	6D	27118854	27119513	NA	NA	Other/Unknown
TraesCS6D02G056800	NA	6D	27122327	27122824	NA	NA	Other/Unknown
TraesCS6D02G056900	NA	6D	27123100	27126984	IPR001810;IPR036047;IPR056594	F-box domain;F-box-like domain superfamily;F-box protein AT5G49610-like, beta-propeller domain	Other/Unknown
TraesCS6D02G057000	NA	6D	27146962	27147645	NA	NA	Other/Unknown
TraesCS6D02G057100	NA	6D	27201950	27202414	NA	NA	Other/Unknown
TraesCS6D02G057200	NA	6D	27305553	27306028	NA	NA	Other/Unknown
TraesCS6D02G057300	NA	6D	27311928	27314060	IPR001810;IPR036047;IPR056594	F-box domain;F-box-like domain superfamily;F-box protein AT5G49610-like, beta-propeller domain	Other/Unknown
TraesCS6D02G057400	NA	6D	27323929	27324628	NA	NA	Other/Unknown
TraesCS6D02G057500	NA	6D	27324856	27329169	IPR001810;IPR036047;IPR056594	F-box domain;F-box-like domain superfamily;F-box protein AT5G49610-like, beta-propeller domain	Other/Unknown
TraesCS6D02G057600	NA	6D	27417818	27418012	IPR003687;IPR037270	Photosystem II PsbK;Photosystem II PsbK superfamily	Other/Unknown
TraesCS6D02G057700	NA	6D	27421302	27423375	IPR007612;IPR025659;IPR038595	LURP-one-related;Tubby-like, C-terminal;LURP-one-related superfamily	Other/Unknown
TraesCS6D02G057800	NA	6D	27452143	27453660	IPR001128;IPR002401;IPR017972;IPR036396	Cytochrome P450;Cytochrome P450, E-class, group I;Cytochrome P450, conserved site;Cytochrome P450 superfamily	Other/Unknown
TraesCS6D02G057900	NA	6D	27493153	27499715	IPR000008;IPR002035;IPR010734;IPR035892;IPR036465;IPR037768;IPR045052	C2 domain;von Willebrand factor, type A;Copine, C-terminal;C2 domain superfamily;von Willebrand factor A-like domain superfamily;Copine, C2B domain;Copine	Other/Unknown
TraesCS6D02G058000	NA	6D	27503270	27507071	IPR001810;IPR036047;IPR056594	F-box domain;F-box-like domain superfamily;F-box protein AT5G49610-like, beta-propeller domain	Other/Unknown
TraesCS6D02G058100	NA	6D	27509937	27513124	IPR001810;IPR036047	F-box domain;F-box-like domain superfamily	Other/Unknown
TraesCS6D02G058200	NA	6D	27520417	27527535	IPR011042;IPR011659	Six-bladed beta-propeller, TolB-like;WD40-like beta propeller	Other/Unknown
TraesCS6D02G058300	NA	6D	27532845	27534093	NA	NA	Other/Unknown
TraesCS6D02G058400	NA	6D	27534172	27534883	IPR001810;IPR036047	F-box domain;F-box-like domain superfamily	Other/Unknown
TraesCS6D02G058500	NA	6D	27537396	27538708	IPR056594	F-box protein AT5G49610-like, beta-propeller domain	Other/Unknown
TraesCS6D02G058600	NA	6D	27549292	27553823	IPR056594	F-box protein AT5G49610-like, beta-propeller domain	Other/Unknown
TraesCS6D02G058700	NA	6D	27672861	27676403	IPR004087;IPR004088;IPR036612	K Homology domain;K Homology domain, type 1;K Homology domain, type 1 superfamily	Other/Unknown
TraesCS6D02G058800	NA	6D	27679682	27683795	IPR001810;IPR036047;IPR056594	F-box domain;F-box-like domain superfamily;F-box protein AT5G49610-like, beta-propeller domain	Other/Unknown
TraesCS6D02G058900	NA	6D	27685567	27690808	NA	NA	Other/Unknown
TraesCS6D02G059000	NA	6D	27707533	27708480	IPR056594	F-box protein AT5G49610-like, beta-propeller domain	Other/Unknown
TraesCS6D02G059100	NA	6D	27729938	27732271	IPR056594	F-box protein AT5G49610-like, beta-propeller domain	Other/Unknown
TraesCS6D02G059200	NA	6D	27733362	27739600	IPR019150	Vesicle transport protein, Use1	Other/Unknown
TraesCS6D02G059300	NA	6D	27819143	27820652	IPR003441;IPR036093	NAC domain;NAC domain superfamily	Other/Unknown
TraesCS6D02G059400	NA	6D	27840233	27843311	IPR001810;IPR036047;IPR056594;IPR003306	F-box domain;F-box-like domain superfamily;F-box protein AT5G49610-like, beta-propeller domain;WIF domain	Other/Unknown
TraesCS6D02G059500	NA	6D	27845300	27849187	IPR001810;IPR011043;IPR036047	F-box domain;Galactose oxidase/kelch, beta-propeller;F-box-like domain superfamily	Other/Unknown
TraesCS6D02G059600	NA	6D	27860028	27863924	IPR001810;IPR036047;IPR056594	F-box domain;F-box-like domain superfamily;F-box protein AT5G49610-like, beta-propeller domain	Other/Unknown
TraesCS6D02G059700	NA	6D	28028173	28028481	IPR003676	Small auxin-up RNA	Other/Unknown
TraesCS6D02G059800	NA	6D	28029509	28029721	NA	NA	Other/Unknown
TraesCS6D02G059900	NA	6D	28034312	28034668	NA	NA	Other/Unknown
TraesCS6D02G060000	NA	6D	28154006	28155199	IPR001810;IPR017451;IPR036047;IPR050796	F-box domain;F-box associated interaction domain;F-box-like domain superfamily;SCF complex F-box component	Other/Unknown
TraesCS6D02G060100	NA	6D	28162313	28162627	IPR003676	Small auxin-up RNA	Other/Unknown
TraesCS6D02G060200	NA	6D	28243049	28246438	IPR000109;IPR036259	Proton-dependent oligopeptide transporter family;MFS transporter superfamily	Other/Unknown
TraesCS6D02G060300	NA	6D	28269392	28269691	IPR003676	Small auxin-up RNA	Other/Unknown
TraesCS6D02G060400	NA	6D	28295207	28301806	IPR002182;IPR027417;IPR032675;IPR036388;IPR041118;IPR042197;IPR056789	NB-ARC;P-loop containing nucleoside triphosphate hydrolase;Leucine-rich repeat domain superfamily;Winged helix-like DNA-binding domain superfamily;Disease resistance, N-terminal;Apoptotic protease-activating factors, helical domain;R13L1/DRL21-like, LRR repeat region	NB-LRR
TraesCS6D02G060500	NA	6D	28301828	28305178	IPR001810;IPR036047;IPR056594	F-box domain;F-box-like domain superfamily;F-box protein AT5G49610-like, beta-propeller domain	Other/Unknown
TraesCS6D02G060600	NA	6D	28309343	28309706	NA	NA	Other/Unknown
TraesCS6D02G060700	NA	6D	28409038	28411475	IPR001810;IPR036047;IPR056594	F-box domain;F-box-like domain superfamily;F-box protein AT5G49610-like, beta-propeller domain	Other/Unknown
TraesCS6D02G060800	NA	6D	28413158	28416084	IPR001810;IPR036047;IPR056594	F-box domain;F-box-like domain superfamily;F-box protein AT5G49610-like, beta-propeller domain	Other/Unknown
TraesCS6D02G060900	NA	6D	28628512	28628781	NA	NA	Other/Unknown
TraesCS6D02G061000	NA	6D	28634628	28634882	NA	NA	Other/Unknown
TraesCS6D02G061100	NA	6D	28653826	28658412	IPR001810;IPR036047;IPR056594	F-box domain;F-box-like domain superfamily;F-box protein AT5G49610-like, beta-propeller domain	Other/Unknown
TraesCS6D02G061200	NA	6D	28680053	28683632	IPR001810;IPR036047;IPR056594	F-box domain;F-box-like domain superfamily;F-box protein AT5G49610-like, beta-propeller domain	Other/Unknown
TraesCS6D02G061300	NA	6D	28688075	28688485	IPR000164;IPR007125;IPR009072	Histone H3/CENP-A;Histone H2A/H2B/H3;Histone-fold	Other/Unknown
TraesCS6D02G061400	NA	6D	28691253	28692166	NA	NA	Other/Unknown
TraesCS6D02G061500	NA	6D	28696247	28700911	IPR000719;IPR008271;IPR011009;IPR017441;IPR050660	Protein kinase domain;Serine/threonine-protein kinase, active site;Protein kinase-like domain superfamily;Protein kinase, ATP binding site;NEK Serine/Threonine Protein Kinase	RLK-other
TraesCS6D02G061600	NA	6D	28698748	28701929	IPR004788;IPR020672;IPR037171;IPR050262	Ribose 5-phosphate isomerase, type A;Ribose-5-phosphate isomerase, type A, subgroup;NagB/RpiA transferase-like;Ribose 5-phosphate isomerase	Other/Unknown
TraesCS6D02G061700	NA	6D	28707572	28708138	IPR001951;IPR009072;IPR019809;IPR035425	Histone H4;Histone-fold;Histone H4, conserved site;CENP-T/Histone H4, histone fold	Other/Unknown
TraesCS6D02G061800	NA	6D	28939905	28943241	IPR003855;IPR053951;IPR053952	Potassium transporter;K+ potassium transporter, integral membrane domain;K+ potassium transporter, C-terminal domain	Other/Unknown
TraesCS6D02G061900	NA	6D	28980325	28980873	IPR010666	Zinc finger, GRF-type	Other/Unknown
TraesCS6D02G062000	NA	6D	28982289	28983437	IPR005174;IPR036047	KIB1-4, beta-propeller;F-box-like domain superfamily	Other/Unknown
TraesCS6D02G062100	NA	6D	28992100	28992730	IPR001951;IPR009072;IPR019809;IPR035425	Histone H4;Histone-fold;Histone H4, conserved site;CENP-T/Histone H4, histone fold	Other/Unknown
TraesCS6D02G062200	NA	6D	28998188	29001661	IPR003855;IPR053951;IPR053952	Potassium transporter;K+ potassium transporter, integral membrane domain;K+ potassium transporter, C-terminal domain	Other/Unknown
TraesCS6D02G062300	NA	6D	29089612	29090570	IPR002119;IPR007125;IPR009072;IPR032454;IPR032458	Histone H2A;Histone H2A/H2B/H3;Histone-fold;Histone H2A, C-terminal domain;Histone H2A conserved site	Other/Unknown
TraesCS6D02G062400	NA	6D	29091373	29094640	IPR001810;IPR011043;IPR036047;IPR056594	F-box domain;Galactose oxidase/kelch, beta-propeller;F-box-like domain superfamily;F-box protein AT5G49610-like, beta-propeller domain	Other/Unknown
TraesCS6D02G062500	NA	6D	29111106	29116632	IPR005574;IPR006590;IPR010997;IPR038324;IPR045222	RNA polymerase subunit Rpb4/RPC9;RNA polymerase Rpb4/RPC9, core;HRDC-like superfamily;Rpb4/RPC9 superfamily;DNA-directed RNA polymerase II subunit Rpb4-like	Other/Unknown
TraesCS6D02G062600	NA	6D	29194711	29198129	IPR001810;IPR036047;IPR056594	F-box domain;F-box-like domain superfamily;F-box protein AT5G49610-like, beta-propeller domain	Other/Unknown
TraesCS6D02G062700	NA	6D	29205127	29206041	IPR001810;IPR036047	F-box domain;F-box-like domain superfamily	Other/Unknown
TraesCS6D02G062800	H2A-2	6D	29380475	29381372	IPR002119;IPR007125;IPR009072;IPR032454;IPR032458	Histone H2A;Histone H2A/H2B/H3;Histone-fold;Histone H2A, C-terminal domain;Histone H2A conserved site	Other/Unknown
TraesCS6D02G062900	NA	6D	29384764	29385282	IPR001951;IPR009072;IPR019809;IPR035425	Histone H4;Histone-fold;Histone H4, conserved site;CENP-T/Histone H4, histone fold	Other/Unknown
TraesCS6D02G063000	NA	6D	29391221	29391989	IPR000164;IPR007125;IPR009072	Histone H3/CENP-A;Histone H2A/H2B/H3;Histone-fold	Other/Unknown
TraesCS6D02G063100	NA	6D	29465492	29467121	IPR001128;IPR002401;IPR017972;IPR036396	Cytochrome P450;Cytochrome P450, E-class, group I;Cytochrome P450, conserved site;Cytochrome P450 superfamily	Other/Unknown
TraesCS6D02G063200	NA	6D	29739716	29740312	IPR000558;IPR007125;IPR009072	Histone H2B;Histone H2A/H2B/H3;Histone-fold	Other/Unknown
TraesCS6D02G063300	NA	6D	29756921	29757731	IPR001951;IPR009072;IPR019809;IPR035425	Histone H4;Histone-fold;Histone H4, conserved site;CENP-T/Histone H4, histone fold	Other/Unknown
TraesCS6D02G063400	NA	6D	29768995	29772072	IPR000152;IPR000719;IPR000742;IPR001881;IPR008271;IPR011009;IPR017441;IPR018097;IPR025287;IPR045274	EGF-type aspartate/asparagine hydroxylation site;Protein kinase domain;EGF-like domain;EGF-like calcium-binding domain;Serine/threonine-protein kinase, active site;Protein kinase-like domain superfamily;Protein kinase, ATP binding site;EGF-like calcium-binding, conserved site;Wall-associated receptor kinase, galacturonan-binding domain;Receptor-like kinase WAK-like	WAK
TraesCS6D02G063500	NA	6D	29875101	29879488	NA	NA	Other/Unknown
TraesCS6D02G063600	NA	6D	29932677	29937544	NA	NA	Other/Unknown
TraesCS6D02G063700	NA	6D	30066374	30067495	IPR001810;IPR036047;IPR056594	F-box domain;F-box-like domain superfamily;F-box protein AT5G49610-like, beta-propeller domain	Other/Unknown
TraesCS6D02G063800	NA	6D	30072995	30075253	IPR040404	Phylloplanin-like	Other/Unknown
TraesCS6D02G063900	NA	6D	30094712	30099707	IPR003323;IPR019400;IPR038765;IPR042467	OTU domain;Peptidase C65, otubain;Papain-like cysteine peptidase superfamily;Peptidase C65, otubain, subdomain 2	Other/Unknown
TraesCS6D02G064000	NA	6D	30186896	30190024	IPR046533	Domain of unknown function DUF6598	Other/Unknown
TraesCS6D02G064100	NA	6D	30212081	30228039	IPR001362;IPR013148;IPR013189;IPR013320;IPR023296;IPR050551	Glycoside hydrolase, family 32;Glycosyl hydrolase family 32, N-terminal;Glycosyl hydrolase family 32, C-terminal;Concanavalin A-like lectin/glucanase domain superfamily;Glycosyl hydrolase, five-bladed beta-propeller domain superfamily;Plant Fructan Metabolism Enzymes	Other/Unknown
TraesCS6D02G064200	NA	6D	30236386	30239754	IPR001362;IPR013148;IPR013189;IPR013320;IPR023296;IPR050551	Glycoside hydrolase, family 32;Glycosyl hydrolase family 32, N-terminal;Glycosyl hydrolase family 32, C-terminal;Concanavalin A-like lectin/glucanase domain superfamily;Glycosyl hydrolase, five-bladed beta-propeller domain superfamily;Plant Fructan Metabolism Enzymes	Other/Unknown
TraesCS6D02G064300	NA	6D	30245066	30248568	IPR001362;IPR013148;IPR013189;IPR013320;IPR023296;IPR050551	Glycoside hydrolase, family 32;Glycosyl hydrolase family 32, N-terminal;Glycosyl hydrolase family 32, C-terminal;Concanavalin A-like lectin/glucanase domain superfamily;Glycosyl hydrolase, five-bladed beta-propeller domain superfamily;Plant Fructan Metabolism Enzymes	Other/Unknown
TraesCS6D02G064400	1-FEHw2	6D	30281142	30285808	IPR001362;IPR013148;IPR013189;IPR013320;IPR023296;IPR050551	Glycoside hydrolase, family 32;Glycosyl hydrolase family 32, N-terminal;Glycosyl hydrolase family 32, C-terminal;Concanavalin A-like lectin/glucanase domain superfamily;Glycosyl hydrolase, five-bladed beta-propeller domain superfamily;Plant Fructan Metabolism Enzymes	Other/Unknown
TraesCS6D02G064500	NA	6D	30535127	30536254	IPR005174	KIB1-4, beta-propeller	Other/Unknown
TraesCS6D02G064600	NA	6D	31261550	31262692	IPR005174	KIB1-4, beta-propeller	Other/Unknown
TraesCS6D02G064700	NA	6D	31267126	31270781	IPR003323;IPR019400;IPR038765;IPR042467	OTU domain;Peptidase C65, otubain;Papain-like cysteine peptidase superfamily;Peptidase C65, otubain, subdomain 2	Other/Unknown
TraesCS6D02G064800	NA	6D	31469888	31474829	IPR003323;IPR019400;IPR038765;IPR042467	OTU domain;Peptidase C65, otubain;Papain-like cysteine peptidase superfamily;Peptidase C65, otubain, subdomain 2	Other/Unknown
TraesCS6D02G064900	NA	6D	31479681	31482120	IPR036047;IPR056594	F-box-like domain superfamily;F-box protein AT5G49610-like, beta-propeller domain	Other/Unknown
TraesCS6D02G065000	NA	6D	31724986	31725396	NA	NA	Other/Unknown
TraesCS6D02G065100	NA	6D	31751236	31755537	IPR001906;IPR005630;IPR008930;IPR008949;IPR034741;IPR036965;IPR050148	Terpene synthase, N-terminal domain;Terpene synthase, metal-binding domain;Terpenoid cyclases/protein prenyltransferase alpha-alpha toroid;Isoprenoid synthase domain superfamily;Terpene cyclase-like 1, C-terminal domain;Terpene synthase, N-terminal domain superfamily;Terpene synthase-like	Other/Unknown
TraesCS6D02G065200	NA	6D	31767335	31771228	IPR001906;IPR005630;IPR008930;IPR008949;IPR034741;IPR036965;IPR050148	Terpene synthase, N-terminal domain;Terpene synthase, metal-binding domain;Terpenoid cyclases/protein prenyltransferase alpha-alpha toroid;Isoprenoid synthase domain superfamily;Terpene cyclase-like 1, C-terminal domain;Terpene synthase, N-terminal domain superfamily;Terpene synthase-like	Other/Unknown
TraesCS6D02G065300	NA	6D	31827799	31828041	NA	NA	Other/Unknown
TraesCS6D02G065400	NA	6D	31851465	31856369	IPR004345	TB2/DP1/HVA22-related protein	Other/Unknown
TraesCS6D02G065500	NA	6D	32037264	32038174	NA	NA	Other/Unknown
TraesCS6D02G065600	NA	6D	32058028	32073111	IPR006680;IPR008146;IPR014746;IPR032466;IPR036651	Amidohydrolase-related;Glutamine synthetase, catalytic domain;Glutamine synthetase/guanido kinase, catalytic domain;Metal-dependent hydrolase;Glutamine synthetase, N-terminal domain superfamily	Other/Unknown
TraesCS6D02G065700	NA	6D	32242316	32244150	IPR046533	Domain of unknown function DUF6598	Other/Unknown
TraesCS6D02G065800	NA	6D	32244533	32245957	IPR001810;IPR006527;IPR017451;IPR036047	F-box domain;F-box associated domain, type 1;F-box associated interaction domain;F-box-like domain superfamily	Other/Unknown
TraesCS6D02G065900	NA	6D	32296642	32299935	IPR006840;IPR013024	Glutathione-specific gamma-glutamylcyclotransferase;Gamma-glutamyl cyclotransferase-like	Other/Unknown
TraesCS6D02G066000	NA	6D	32318862	32320001	IPR001810;IPR011043;IPR017451;IPR036047	F-box domain;Galactose oxidase/kelch, beta-propeller;F-box associated interaction domain;F-box-like domain superfamily	Other/Unknown
TraesCS6D02G066100	NA	6D	32441851	32448755	IPR040305	At1g75730-like	Other/Unknown
TraesCS6D02G066200	NA	6D	32458745	32460484	NA	NA	Other/Unknown
TraesCS6D02G066400	NA	6D	32639265	32640789	IPR002182;IPR027417;IPR038005;IPR041118	NB-ARC;P-loop containing nucleoside triphosphate hydrolase;Virus X resistance protein-like, coiled-coil domain;Disease resistance, N-terminal	Other/Unknown
TraesCS6D02G066500	NA	6D	32647756	32651159	IPR001763;IPR020936;IPR036873;IPR040503	Rhodanese-like domain;tRNA uridine(34) hydroxylase;Rhodanese-like domain superfamily;tRNA uridine(34) hydroxylase, N-terminal	Other/Unknown
TraesCS6D02G066600	NA	6D	32656767	32660566	IPR032675;IPR050905	Leucine-rich repeat domain superfamily;Plant disease resistance NBS-LRR	RLP
TraesCS6D02G066700	CyP3	6D	32693962	32694930	IPR002130;IPR020892;IPR024936;IPR029000	Cyclophilin-type peptidyl-prolyl cis-trans isomerase domain;Cyclophilin-type peptidyl-prolyl cis-trans isomerase, conserved site;Cyclophilin-type peptidyl-prolyl cis-trans isomerase;Cyclophilin-like domain superfamily	Other/Unknown
TraesCS6D02G066800	NA	6D	32858418	32861502	IPR001362;IPR013148;IPR013189;IPR013320;IPR018053;IPR023296;IPR050551	Glycoside hydrolase, family 32;Glycosyl hydrolase family 32, N-terminal;Glycosyl hydrolase family 32, C-terminal;Concanavalin A-like lectin/glucanase domain superfamily;Glycoside hydrolase, family 32, active site;Glycosyl hydrolase, five-bladed beta-propeller domain superfamily;Plant Fructan Metabolism Enzymes	Other/Unknown
TraesCS6D02G066900	NA	6D	32861735	32866346	IPR001611;IPR003591;IPR013210;IPR032675;IPR046956;IPR055414	Leucine-rich repeat;Leucine-rich repeat, typical subtype;Leucine-rich repeat-containing N-terminal, plant-type;Leucine-rich repeat domain superfamily;Receptor-like protein 23-like;Disease resistance R13L4/SHOC-2-like, LRR domain	RLP
TraesCS6D02G067000	NA	6D	32870081	32873494	IPR029466	No apical meristem-associated, C-terminal domain	Other/Unknown
TraesCS6D02G067100	NA	6D	32902413	32904237	IPR001810;IPR032675;IPR036047;IPR053197;IPR053781	F-box domain;Leucine-rich repeat domain superfamily;F-box-like domain superfamily;F-box/SCF ubiquitin ligase complex component;F-box/LRR-repeat protein 13-like, F-box domain	RLP
TraesCS6D02G067200	NA	6D	32905829	32908466	IPR000719;IPR011009;IPR051564	Protein kinase domain;Protein kinase-like domain superfamily;Leucine-rich repeat receptor-like kinase	LRR-RLK
TraesCS6D02G067300	NA	6D	32907931	32909159	IPR013201;IPR038765	Cathepsin propeptide inhibitor domain (I29);Papain-like cysteine peptidase superfamily	Other/Unknown
TraesCS6D02G067400	NA	6D	32914008	32921758	IPR010286;IPR017182;IPR029063	METTL16/RlmF family;Methyltransferase METTL16/PsiM;S-adenosyl-L-methionine-dependent methyltransferase superfamily	Other/Unknown
TraesCS6D02G067500	NA	6D	33142211	33143272	IPR001878;IPR002059;IPR011129;IPR012340;IPR019844;IPR036875	Zinc finger, CCHC-type;Cold-shock protein Csp, DNA-binding;Cold-shock domain;Nucleic acid-binding, OB-fold;Cold-shock domain, conserved site;Zinc finger, CCHC-type superfamily	Other/Unknown
TraesCS6D02G067600	NA	6D	33249883	33253632	IPR001810;IPR036047;IPR053197;IPR053781	F-box domain;F-box-like domain superfamily;F-box/SCF ubiquitin ligase complex component;F-box/LRR-repeat protein 13-like, F-box domain	Other/Unknown
TraesCS6D02G067700	NA	6D	33309749	33312715	IPR001810;IPR036047;IPR053197;IPR053781	F-box domain;F-box-like domain superfamily;F-box/SCF ubiquitin ligase complex component;F-box/LRR-repeat protein 13-like, F-box domain	Other/Unknown
TraesCS6D02G067800	NA	6D	33894946	33896451	IPR003690;IPR038538	Transcription termination factor, mitochondrial/chloroplastic;MTERF superfamily, mitochondrial/chloroplastic	Other/Unknown
TraesCS6D02G067900	NA	6D	34080010	34085216	IPR008207;IPR036641;IPR045871	Signal transduction histidine kinase, phosphotransfer (Hpt) domain;HPT domain superfamily;Histidine-containing phosphotransfer protein 1-5/Phosphorelay intermediate protein YPD1	Other/Unknown
TraesCS6D02G068000	NA	6D	34294385	34297790	IPR001810;IPR036047;IPR053197;IPR053781	F-box domain;F-box-like domain superfamily;F-box/SCF ubiquitin ligase complex component;F-box/LRR-repeat protein 13-like, F-box domain	Other/Unknown
TraesCS6D02G068100	NA	6D	34303341	34306167	IPR001810;IPR036047;IPR053197;IPR053781	F-box domain;F-box-like domain superfamily;F-box/SCF ubiquitin ligase complex component;F-box/LRR-repeat protein 13-like, F-box domain	Other/Unknown
TraesCS6D02G068200	NA	6D	34321191	34323876	IPR001810;IPR036047;IPR053197;IPR053781	F-box domain;F-box-like domain superfamily;F-box/SCF ubiquitin ligase complex component;F-box/LRR-repeat protein 13-like, F-box domain	Other/Unknown
TraesCS6D02G068300	NA	6D	34338306	34342558	IPR000924;IPR001412;IPR004527;IPR008925;IPR014729;IPR020058;IPR020751;IPR033910;IPR045462;IPR049940	Glutamyl/glutaminyl-tRNA synthetase;Aminoacyl-tRNA synthetase, class I, conserved site;Glutamate-tRNA ligase, bacterial/mitochondrial;Aminoacyl-tRNA synthetase, class I, anticodon-binding superfamily;Rossmann-like alpha/beta/alpha sandwich fold;Glutamyl/glutaminyl-tRNA synthetase, class Ib, catalytic domain;Aminoacyl-tRNA synthetase, class I, anticodon-binding domain, subdomain 2;Glutamyl-tRNA sy…	Other/Unknown
TraesCS6D02G068400	NA	6D	34343238	34347220	IPR000672;IPR020630;IPR020631;IPR020867;IPR036291;IPR046346	Tetrahydrofolate dehydrogenase/cyclohydrolase;Tetrahydrofolate dehydrogenase/cyclohydrolase, catalytic domain;Tetrahydrofolate dehydrogenase/cyclohydrolase, NAD(P)-binding domain;Tetrahydrofolate dehydrogenase/cyclohydrolase, conserved site;NAD(P)-binding domain superfamily;Aminoacid dehydrogenase-like, N-terminal domain superfamily	Other/Unknown
TraesCS6D02G068500	NA	6D	34394637	34398291	IPR001806;IPR003578;IPR005225;IPR027417	Small GTPase;Small GTPase Rho;Small GTP-binding protein domain;P-loop containing nucleoside triphosphate hydrolase	Other/Unknown
TraesCS6D02G068600	NA	6D	34430676	34432091	IPR036047	F-box-like domain superfamily	Other/Unknown
TraesCS6D02G068700	NA	6D	34502038	34503411	IPR001810;IPR036047	F-box domain;F-box-like domain superfamily	Other/Unknown
TraesCS6D02G068800	NA	6D	34508133	34509248	IPR036047	F-box-like domain superfamily	Other/Unknown
TraesCS6D02G068900	NA	6D	34520732	34520935	IPR000864;IPR036354	Proteinase inhibitor I13, potato inhibitor I;Proteinase inhibitor I13, potato inhibitor I superfamily	Other/Unknown
TraesCS6D02G069000	NA	6D	34540596	34541467	IPR000608;IPR016135;IPR023313	Ubiquitin-conjugating enzyme E2;Ubiquitin-conjugating enzyme/RWD-like;Ubiquitin-conjugating enzyme, active site	Other/Unknown
TraesCS6D02G069100	NA	6D	34577584	34581132	IPR001810;IPR036047	F-box domain;F-box-like domain superfamily	Other/Unknown
TraesCS6D02G069200	NA	6D	34583067	34584056	IPR011043;IPR056594	Galactose oxidase/kelch, beta-propeller;F-box protein AT5G49610-like, beta-propeller domain	Other/Unknown
TraesCS6D02G069300	NA	6D	34733906	34736966	IPR011598;IPR036638;IPR051358;IPR054502	Myc-type, basic helix-loop-helix (bHLH) domain;Helix-loop-helix DNA-binding domain superfamily;Transcription factor AMS/ICE1/BHLH6-like;Plant bHLH transcription factor, ACT-like domain	Other/Unknown
TraesCS6D02G069400	NA	6D	34926453	34929634	IPR011598;IPR036638;IPR051358;IPR054502	Myc-type, basic helix-loop-helix (bHLH) domain;Helix-loop-helix DNA-binding domain superfamily;Transcription factor AMS/ICE1/BHLH6-like;Plant bHLH transcription factor, ACT-like domain	Other/Unknown
TraesCS6D02G069500	NA	6D	34947606	34951802	IPR000152;IPR000719;IPR000742;IPR001245;IPR001881;IPR008271;IPR011009;IPR017441;IPR018097;IPR025287;IPR045274	EGF-type aspartate/asparagine hydroxylation site;Protein kinase domain;EGF-like domain;Serine-threonine/tyrosine-protein kinase, catalytic domain;EGF-like calcium-binding domain;Serine/threonine-protein kinase, active site;Protein kinase-like domain superfamily;Protein kinase, ATP binding site;EGF-like calcium-binding, conserved site;Wall-associated receptor kinase, galacturonan-binding domain;Re…	WAK
TraesCS6D02G069600	NA	6D	34972592	34974884	IPR006204;IPR013750;IPR020568;IPR036554;IPR053034	GHMP kinase N-terminal domain;GHMP kinase, C-terminal domain;Ribosomal protein uS5 domain 2-type superfamily;GHMP kinase, C-terminal domain superfamily;Glucuronokinase-like	Other/Unknown

## Sheet: Supplementary Table S7
Supplementary Table S7. Gene content of the qSTB-3A.1 interval based on the IWGSC RefSeq v.1.1 wheat genome annotation.
RefSeq v1.1 GeneID	Gene Name	Chromosome	Start Position	End Position	Interpro ID	Interpro Description	Gene Type
TraesCS3A02G044800	NA	3A	24055521	24060595	IPR001250;IPR011051;IPR014710;IPR016305;IPR018050;IPR046456;IPR046457;IPR046458	Mannose-6-phosphate isomerase, type I;RmlC-like cupin domain superfamily;RmlC-like jelly roll fold;Mannose-6-phosphate isomerase;Phosphomannose isomerase, type I, conserved site;Phosphomannose isomerase type I, C-terminal domain;Phosphomannose isomerase type I, catalytic domain;Phosphomannose isomerase type I, helical insertion domain	Other/Unknown
TraesCS3A02G044900	NA	3A	24107519	24108695	NA	NA	Other/Unknown
TraesCS3A02G045100	NA	3A	24200174	24200521	IPR036574	Knottin, scorpion toxin-like superfamily	Other/Unknown
TraesCS3A02G045200	NA	3A	24205959	24209204	IPR000719;IPR001245;IPR008271;IPR011009;IPR052059	Protein kinase domain;Serine-threonine/tyrosine-protein kinase, catalytic domain;Serine/threonine-protein kinase, active site;Protein kinase-like domain superfamily;Cysteine-rich Ser/Thr receptor-like kinase	CRK
TraesCS3A02G045300	NA	3A	24461580	24474835	IPR018170;IPR020471;IPR023210;IPR036812	Aldo/keto reductase, conserved site;Aldo-keto reductase;NADP-dependent oxidoreductase domain;NADP-dependent oxidoreductase domain superfamily	Other/Unknown
TraesCS3A02G045400	NA	3A	24489684	24493671	;IPR038765	;Papain-like cysteine peptidase superfamily	Other/Unknown
TraesCS3A02G045500	NA	3A	24509826	24511331	IPR000877;IPR035995	Proteinase inhibitor I12, Bowman-Birk;Bowman-Birk type proteinase inhibitor	Other/Unknown
TraesCS3A02G045600	NA	3A	24525863	24526778	IPR000877;IPR035995	Proteinase inhibitor I12, Bowman-Birk;Bowman-Birk type proteinase inhibitor	Other/Unknown
TraesCS3A02G045700	NA	3A	24537872	24538540	IPR000877;IPR035995	Proteinase inhibitor I12, Bowman-Birk;Bowman-Birk type proteinase inhibitor	Other/Unknown
TraesCS3A02G045800	NA	3A	24597937	24599319	IPR001611;IPR003591;IPR032675;IPR046956	Leucine-rich repeat;Leucine-rich repeat, typical subtype;Leucine-rich repeat domain superfamily;Receptor-like protein 23-like	RLP
TraesCS3A02G045900	NA	3A	24604683	24607733	IPR001611;IPR003591;IPR013210;IPR032675;IPR046956	Leucine-rich repeat;Leucine-rich repeat, typical subtype;Leucine-rich repeat-containing N-terminal, plant-type;Leucine-rich repeat domain superfamily;Receptor-like protein 23-like	RLP
TraesCS3A02G046000	NA	3A	24611605	24612579	IPR000877;IPR035995	Proteinase inhibitor I12, Bowman-Birk;Bowman-Birk type proteinase inhibitor	Other/Unknown
TraesCS3A02G046100	NA	3A	24678221	24679061	IPR000877;IPR035995	Proteinase inhibitor I12, Bowman-Birk;Bowman-Birk type proteinase inhibitor	Other/Unknown
TraesCS3A02G046200	NA	3A	24683048	24684141	IPR000877;IPR035995	Proteinase inhibitor I12, Bowman-Birk;Bowman-Birk type proteinase inhibitor	Other/Unknown
TraesCS3A02G046300	NA	3A	24748236	24748973	IPR000877;IPR035995	Proteinase inhibitor I12, Bowman-Birk;Bowman-Birk type proteinase inhibitor	Other/Unknown
TraesCS3A02G046400	NA	3A	24753476	24754272	NA	NA	Other/Unknown
TraesCS3A02G046500	NA	3A	24779625	24781856	IPR002641;IPR016035	Patatin-like phospholipase domain;Acyl transferase/acyl hydrolase/lysophospholipase	Other/Unknown
TraesCS3A02G046600	NA	3A	24786661	24787626	IPR000877;IPR035995	Proteinase inhibitor I12, Bowman-Birk;Bowman-Birk type proteinase inhibitor	Other/Unknown
TraesCS3A02G046700	NA	3A	24798575	24799737	IPR001509;IPR036291;IPR050425	NAD-dependent epimerase/dehydratase;NAD(P)-binding domain superfamily;NAD(P)-dependent dehydratase-like	Other/Unknown
TraesCS3A02G046800	NA	3A	24877322	24878229	IPR001005;IPR009057;IPR015495;IPR017930	SANT/Myb domain;Homedomain-like superfamily;Myb transcription factor, plants;Myb domain	Other/Unknown
TraesCS3A02G046900	NA	3A	24888911	24891748	IPR021763	Protein of unknown function DUF3326	Other/Unknown
TraesCS3A02G047000	NA	3A	24939330	24940568	IPR001461;IPR021109;IPR032799;IPR032861;IPR033121	Aspartic peptidase A1 family;Aspartic peptidase domain superfamily;Xylanase inhibitor, C-terminal;Xylanase inhibitor, N-terminal;Peptidase family A1 domain	Other/Unknown
TraesCS3A02G047100	NA	3A	24971694	24973286	IPR001461;IPR021109;IPR032799;IPR033121	Aspartic peptidase A1 family;Aspartic peptidase domain superfamily;Xylanase inhibitor, C-terminal;Peptidase family A1 domain	Other/Unknown
TraesCS3A02G047200	NA	3A	24996681	25001321	IPR000825;IPR011542;IPR037284	SUF system FeS cluster assembly, SufBD core domain;SUF system FeS cluster assembly, SufD;SUF system FeS cluster assembly, SufBD superfamily	Other/Unknown
TraesCS3A02G047300	NA	3A	25038048	25039649	IPR001810;IPR036047	F-box domain;F-box-like domain superfamily	Other/Unknown
TraesCS3A02G047400	NA	3A	25052157	25053288	NA	NA	Other/Unknown
TraesCS3A02G047500	NA	3A	25114790	25118577	IPR008972;IPR011706;IPR011707;IPR052152	Cupredoxin;Multicopper oxidase, C-terminal;Multicopper oxidase-like, N-terminal;Multicopper oxidase LPR1/LPR2	Other/Unknown
TraesCS3A02G047600	NA	3A	25183353	25186556	IPR032675;IPR036388;IPR056789	Leucine-rich repeat domain superfamily;Winged helix-like DNA-binding domain superfamily;R13L1/DRL21-like, LRR repeat region	RLP
TraesCS3A02G047700	NA	3A	25355986	25362478	IPR000608;IPR016135	Ubiquitin-conjugating enzyme E2;Ubiquitin-conjugating enzyme/RWD-like	Other/Unknown
TraesCS3A02G047800	NA	3A	25368166	25373886	IPR001680;IPR015943;IPR019775;IPR036322	WD40 repeat;WD40/YVTN repeat-like-containing domain superfamily;WD40 repeat, conserved site;WD40-repeat-containing domain superfamily	Other/Unknown
TraesCS3A02G047900	NA	3A	25387811	25389485	IPR029069;IPR050563	HotDog domain superfamily;4-hydroxybenzoyl-CoA thioesterase	Other/Unknown
TraesCS3A02G048000	NA	3A	25498604	25501205	IPR006121;IPR036163	Heavy metal-associated domain, HMA;Heavy metal-associated domain superfamily	Other/Unknown
TraesCS3A02G048200	NA	3A	25766771	25767585	NA	NA	Other/Unknown
TraesCS3A02G048300	NA	3A	25871914	25876451	IPR013010;IPR013083;IPR049548;IPR052088	Zinc finger, SIAH-type;Zinc finger, RING/FYVE/PHD-type;E3 ubiquitin-protein ligase Sina-like, RING finger;E3 ubiquitin-protein ligase SINA	Other/Unknown
TraesCS3A02G048400	NA	3A	25896099	25897547	IPR002213	UDP-glucuronosyl/UDP-glucosyltransferase	Other/Unknown
TraesCS3A02G048500	NA	3A	25906101	25909271	IPR002067;IPR002113;IPR018108;IPR023395	Mitochondrial carrier protein;ADP/ATP carrier protein, eukaryotic type;Mitochondrial substrate/solute carrier;Mitochondrial carrier domain superfamily	Other/Unknown
TraesCS3A02G048600	NA	3A	25910349	25911590	IPR027417	P-loop containing nucleoside triphosphate hydrolase	Other/Unknown
TraesCS3A02G048700	NA	3A	25932733	25959492	IPR000719;IPR008271;IPR011009;IPR017441;IPR025287;IPR032872	Protein kinase domain;Serine/threonine-protein kinase, active site;Protein kinase-like domain superfamily;Protein kinase, ATP binding site;Wall-associated receptor kinase, galacturonan-binding domain;Wall-associated receptor kinase, C-terminal	WAK
TraesCS3A02G049000	NA	3A	25978320	25994023	IPR025287;IPR032872	Wall-associated receptor kinase, galacturonan-binding domain;Wall-associated receptor kinase, C-terminal	WAK
TraesCS3A02G049100	NA	3A	25989812	25990481	NA	NA	Other/Unknown
TraesCS3A02G049200	NA	3A	25997684	25998166	IPR036188;IPR050982	FAD/NAD(P)-binding domain superfamily;Auxin biosynthesis and cation transport	Other/Unknown
TraesCS3A02G049300	NA	3A	26040507	26042113	NA	NA	Other/Unknown
TraesCS3A02G049375	WAKL2	3A	26140557	26143078	IPR000719;IPR008271;IPR011009;IPR017441;IPR025287;IPR045874	Protein kinase domain;Serine/threonine-protein kinase, active site;Protein kinase-like domain superfamily;Protein kinase, ATP binding site;Wall-associated receptor kinase, galacturonan-binding domain;Rust resistance kinase Lr10/LRL2.1-2.5-like	WAK
TraesCS3A02G049400	WAKL3	3A	26194495	26197273	IPR000719;IPR008271;IPR011009;IPR017441;IPR025287;IPR045874	Protein kinase domain;Serine/threonine-protein kinase, active site;Protein kinase-like domain superfamily;Protein kinase, ATP binding site;Wall-associated receptor kinase, galacturonan-binding domain;Rust resistance kinase Lr10/LRL2.1-2.5-like	WAK
TraesCS3A02G049500	stb6	3A	26200196	26206871	IPR000719;IPR008271;IPR011009;IPR017441;IPR025287;IPR045874	Protein kinase domain;Serine/threonine-protein kinase, active site;Protein kinase-like domain superfamily;Protein kinase, ATP binding site;Wall-associated receptor kinase, galacturonan-binding domain;Rust resistance kinase Lr10/LRL2.1-2.5-like	WAK
TraesCS3A02G049600	NA	3A	26229850	26234135	IPR000719;IPR008271;IPR011009;IPR017441;IPR025287;IPR045874	Protein kinase domain;Serine/threonine-protein kinase, active site;Protein kinase-like domain superfamily;Protein kinase, ATP binding site;Wall-associated receptor kinase, galacturonan-binding domain;Rust resistance kinase Lr10/LRL2.1-2.5-like	WAK
TraesCS3A02G049700	NA	3A	26241274	26241666	IPR025287	Wall-associated receptor kinase, galacturonan-binding domain	WAK
TraesCS3A02G049800	NA	3A	26243906	26244742	NA	NA	Other/Unknown
TraesCS3A02G050100	NA	3A	26410497	26428895	IPR000719;IPR008271;IPR011009;IPR017441;IPR025287;IPR045874	Protein kinase domain;Serine/threonine-protein kinase, active site;Protein kinase-like domain superfamily;Protein kinase, ATP binding site;Wall-associated receptor kinase, galacturonan-binding domain;Rust resistance kinase Lr10/LRL2.1-2.5-like	WAK
TraesCS3A02G050211	NA	3A	26469173	26482725	IPR000719;IPR008271;IPR011009;IPR017441;IPR025287;IPR045874	Protein kinase domain;Serine/threonine-protein kinase, active site;Protein kinase-like domain superfamily;Protein kinase, ATP binding site;Wall-associated receptor kinase, galacturonan-binding domain;Rust resistance kinase Lr10/LRL2.1-2.5-like	WAK
TraesCS3A02G050300	NA	3A	26517886	26523568	IPR000719;IPR008271;IPR011009;IPR017441;IPR025287;IPR032872;IPR045874	Protein kinase domain;Serine/threonine-protein kinase, active site;Protein kinase-like domain superfamily;Protein kinase, ATP binding site;Wall-associated receptor kinase, galacturonan-binding domain;Wall-associated receptor kinase, C-terminal;Rust resistance kinase Lr10/LRL2.1-2.5-like	WAK
TraesCS3A02G050400	NA	3A	26578823	26579251	NA	NA	Other/Unknown
TraesCS3A02G050500	NA	3A	26828394	26830290	IPR011697;IPR029062;IPR044668	Peptidase C26;Class I glutamine amidotransferase-like;Peptidase C26, gamma-glutamyl-gamma-aminobutyrate hydrolase PuuD-like	Other/Unknown
TraesCS3A02G050600	NA	3A	26851663	26852220	IPR055802	Domain of unknown function DUF7378	Other/Unknown
TraesCS3A02G050700	NA	3A	26870590	26872461	IPR011697;IPR029062;IPR044668	Peptidase C26;Class I glutamine amidotransferase-like;Peptidase C26, gamma-glutamyl-gamma-aminobutyrate hydrolase PuuD-like	Other/Unknown
TraesCS3A02G050800	NA	3A	27007424	27010880	IPR013341;IPR013342;IPR029017;IPR029065;IPR034603;IPR036849	Mandelate racemase/muconate lactonizing enzyme, N-terminal domain;Mandelate racemase/muconate lactonizing enzyme, C-terminal;Enolase-like, N-terminal;Enolase C-terminal domain-like;Dipeptide epimerase;Enolase-like, C-terminal domain superfamily	Other/Unknown
TraesCS3A02G050900	NA	3A	27532594	27533190	IPR040417	Glycine-rich cell wall structural protein 1/2	Other/Unknown
TraesCS3A02G051000	NA	3A	27543553	27544548	IPR001841;IPR013083;IPR044600	Zinc finger, RING-type;Zinc finger, RING/FYVE/PHD-type;RING-H2 finger protein ATL1/ATL16-like	Other/Unknown
TraesCS3A02G051100	NA	3A	27550728	27551266	IPR001087;IPR036514	GDSL lipase/esterase;SGNH hydrolase superfamily	Other/Unknown
TraesCS3A02G051200	NA	3A	27577899	27579649	IPR003388;IPR045064	Reticulon;Reticulon-like	Other/Unknown
TraesCS3A02G051300	NA	3A	27581973	27582194	NA	NA	Other/Unknown
TraesCS3A02G051400	NA	3A	27582718	27582939	NA	NA	Other/Unknown
TraesCS3A02G051500	NA	3A	27583463	27583684	NA	NA	Other/Unknown
TraesCS3A02G051600	NA	3A	27584208	27584414	NA	NA	Other/Unknown
TraesCS3A02G051700	NA	3A	27584953	27585174	NA	NA	Other/Unknown
TraesCS3A02G051800	NA	3A	27588851	27591922	IPR000270;IPR053198	PB1 domain;Gynoecium Development Regulator	Other/Unknown
TraesCS3A02G052100	NA	3A	27760947	27765556	IPR000326;IPR036938;IPR043216	Phosphatidic acid phosphatase type 2/haloperoxidase;Phosphatidic acid phosphatase type 2/haloperoxidase superfamily;Phosphatidate (PA) phosphatase-related	Other/Unknown
TraesCS3A02G052200	NA	3A	27797920	27798258	NA	NA	Other/Unknown
TraesCS3A02G052300	NA	3A	28125510	28127926	IPR001128;IPR002401;IPR017972;IPR036396;IPR053062	Cytochrome P450;Cytochrome P450, E-class, group I;Cytochrome P450, conserved site;Cytochrome P450 superfamily;Cytochrome P450 84A	Other/Unknown
TraesCS3A02G052400	NA	3A	28206425	28206757	NA	NA	Other/Unknown
TraesCS3A02G052500	NA	3A	28322266	28322889	NA	NA	Other/Unknown
TraesCS3A02G052600	NA	3A	28390838	28391308	NA	NA	Other/Unknown
TraesCS3A02G052700	NA	3A	28476216	28477243	IPR003757;IPR022980;IPR036592	Photosystem I PsaL, reaction centre subunit XI;Photosystem I, reaction centre subunit XI;Photosystem I PsaL, reaction centre subunit XI superfamily	Other/Unknown
TraesCS3A02G052800	NA	3A	28627230	28627889	IPR004364;IPR006195;IPR045864	Aminoacyl-tRNA synthetase, class II (D/K/N);Aminoacyl-tRNA synthetase, class II;Class II Aminoacyl-tRNA synthetase/Biotinyl protein ligase (BPL) and lipoyl protein ligase (LPL)	Other/Unknown
TraesCS3A02G052900	NA	3A	28879121	28879548	NA	NA	Other/Unknown
TraesCS3A02G053000	NA	3A	29048596	29048943	IPR000528;IPR016140;IPR036312	Plant non-specific lipid-transfer protein/Par allergen;Bifunctional inhibitor/plant lipid transfer protein/seed storage helical domain;Bifunctional inhibitor/plant lipid transfer protein/seed storage helical domain superfamily	Other/Unknown
TraesCS3A02G053100	NA	3A	29351629	29351976	IPR000528;IPR016140;IPR036312	Plant non-specific lipid-transfer protein/Par allergen;Bifunctional inhibitor/plant lipid transfer protein/seed storage helical domain;Bifunctional inhibitor/plant lipid transfer protein/seed storage helical domain superfamily	Other/Unknown
TraesCS3A02G053200	NA	3A	29724499	29724843	IPR000528;IPR016140;IPR036312	Plant non-specific lipid-transfer protein/Par allergen;Bifunctional inhibitor/plant lipid transfer protein/seed storage helical domain;Bifunctional inhibitor/plant lipid transfer protein/seed storage helical domain superfamily	Other/Unknown
TraesCS3A02G053300	CBL9	3A	30344590	30347556	IPR002048;IPR011992;IPR018247;IPR045198	EF-hand domain;EF-hand domain pair;EF-Hand 1, calcium-binding site;Calcineurin B-like	Other/Unknown
TraesCS3A02G053400	NA	3A	30362393	30363184	IPR013181;IPR041118	Protein of unknown function DUF1719;Disease resistance, N-terminal	Other/Unknown
TraesCS3A02G053500	NA	3A	30444029	30445832	IPR013181	Protein of unknown function DUF1719	Other/Unknown
TraesCS3A02G053600	NA	3A	30543693	30545891	IPR001461;IPR021109;IPR032799;IPR032861;IPR033121;IPR033873	Aspartic peptidase A1 family;Aspartic peptidase domain superfamily;Xylanase inhibitor, C-terminal;Xylanase inhibitor, N-terminal;Peptidase family A1 domain;CND41-like	Other/Unknown
TraesCS3A02G053700	NA	3A	30560440	30564806	IPR015257;IPR038564	Repressor of RNA polymerase III transcription Maf1;Repressor of RNA polymerase III transcription Maf1 superfamily	Other/Unknown
TraesCS3A02G053800	NA	3A	30749621	30755910	IPR001611;IPR024788;IPR032675	Leucine-rich repeat;Malectin-like domain;Leucine-rich repeat domain superfamily	RLP
TraesCS3A02G053900	NA	3A	30996679	30998012	IPR001471;IPR003340;IPR015300;IPR016177;IPR036955;IPR044800	AP2/ERF domain;B3 DNA binding domain;DNA-binding pseudobarrel domain superfamily;DNA-binding domain superfamily;AP2/ERF domain superfamily;B3 domain-containing transcription factor LEC2-like	Other/Unknown
TraesCS3A02G054000	NA	3A	31558996	31560648	IPR001471;IPR003340;IPR015300;IPR016177;IPR036955;IPR044800	AP2/ERF domain;B3 DNA binding domain;DNA-binding pseudobarrel domain superfamily;DNA-binding domain superfamily;AP2/ERF domain superfamily;B3 domain-containing transcription factor LEC2-like	Other/Unknown
TraesCS3A02G054100	NA	3A	31659532	31667152	IPR003593;IPR003959;IPR003960;IPR007330;IPR015415;IPR027417;IPR036181;IPR045253;IPR050304	AAA+ ATPase domain;ATPase, AAA-type, core;ATPase, AAA-type, conserved site;MIT domain;Spastin/Vps4, C-terminal;P-loop containing nucleoside triphosphate hydrolase;MIT domain superfamily;Vacuolar protein sorting-associated protein 4, MIT domain;Microtubule-severing AAA ATPase	Other/Unknown
TraesCS3A02G054200	NA	3A	31735342	31741833	IPR005654;IPR027417	ATPase, AFG1-like;P-loop containing nucleoside triphosphate hydrolase	Other/Unknown
TraesCS3A02G054300	NA	3A	31788002	31788692	IPR006501;IPR034086;IPR035513;IPR052421	Pectinesterase inhibitor domain;Pectinesterase inhibitor, plant;Invertase/pectin methylesterase inhibitor domain superfamily;Plant Cell Wall Enzyme Inhibitor	Other/Unknown
TraesCS3A02G054400	NA	3A	31847956	31849368	IPR002213;IPR050481	UDP-glucuronosyl/UDP-glucosyltransferase;UDP-glycosyltransferase, plant-type	Other/Unknown
TraesCS3A02G054500	NA	3A	31888572	31906228	NA	NA	Other/Unknown
TraesCS3A02G054600	NA	3A	31926134	31930997	IPR002182;IPR003593;IPR027417;IPR032675;IPR036388;IPR038005;IPR041118;IPR042197;IPR044974;IPR055414	NB-ARC;AAA+ ATPase domain;P-loop containing nucleoside triphosphate hydrolase;Leucine-rich repeat domain superfamily;Winged helix-like DNA-binding domain superfamily;Virus X resistance protein-like, coiled-coil domain;Disease resistance, N-terminal;Apoptotic protease-activating factors, helical domain;Disease resistance protein, plants;Disease resistance R13L4/SHOC-2-like, LRR domain	NB-LRR
TraesCS3A02G054700	NA	3A	31948379	31952404	IPR001680;IPR015943;IPR033312;IPR036322	WD40 repeat;WD40/YVTN repeat-like-containing domain superfamily;DNA damage-binding protein 2;WD40-repeat-containing domain superfamily	Other/Unknown
TraesCS3A02G054800	NA	3A	31952535	31956959	IPR006968;IPR054549;IPR055412	Root UVB sensitive family;Protein root UVB sensitive/RUS domain;Root UVB sensitive protein, C-terminal	Other/Unknown
TraesCS3A02G054900	NA	3A	32096354	32097926	IPR002213	UDP-glucuronosyl/UDP-glucosyltransferase	Other/Unknown
TraesCS3A02G055000	NA	3A	32100094	32100573	IPR000668;IPR013128;IPR025660;IPR025661;IPR038765;IPR039417	Peptidase C1A, papain C-terminal;Peptidase C1A;Cysteine peptidase, histidine active site;Cysteine peptidase, asparagine active site;Papain-like cysteine peptidase superfamily;Papain-like cysteine endopeptidase	Other/Unknown
TraesCS3A02G055100	NA	3A	32114968	32120378	NA	NA	Other/Unknown
TraesCS3A02G055200	NA	3A	32118364	32119341	IPR011049	Serralysin-like metalloprotease, C-terminal	Other/Unknown
TraesCS3A02G055300	NA	3A	32120273	32124902	IPR008915;IPR044838	Peptidase M50;Probable metalloprotease EGY1-like	Other/Unknown
TraesCS3A02G055400	NA	3A	32142262	32144885	IPR013926;IPR036504	CGI121/TPRKB;CGI121/TPRKB superfamily	Other/Unknown
TraesCS3A02G055500	NA	3A	32145925	32149547	IPR001296;IPR028098;IPR050194	Glycosyl transferase, family 1;Glycosyltransferase subfamily 4-like, N-terminal domain;Glycosyltransferase group 1	Other/Unknown
TraesCS3A02G055600	NA	3A	32150045	32153332	IPR000308;IPR023409;IPR023410;IPR036815	14-3-3 protein;14-3-3 protein, conserved site;14-3-3 domain;14-3-3 domain superfamily	Other/Unknown
TraesCS3A02G055700	NA	3A	32152342	32152995	IPR001810;IPR036047;IPR044184	F-box domain;F-box-like domain superfamily;F-box protein SNE/GID2	Other/Unknown
TraesCS3A02G055800	NA	3A	32173013	32176735	IPR004045;IPR004046;IPR010987;IPR034347;IPR036249;IPR036282;IPR040079	Glutathione S-transferase, N-terminal;Glutathione S-transferase, C-terminal;Glutathione S-transferase, C-terminal-like;Glutathione S-transferases Phi, C-terminal;Thioredoxin-like superfamily;Glutathione S-transferase, C-terminal domain superfamily;Glutathione transferase family	Other/Unknown
TraesCS3A02G055900	NA	3A	32224350	32234406	IPR002528;IPR045069	Multi antimicrobial extrusion protein;Multidrug and toxic compound extrusion family, eukaryotic	Other/Unknown
TraesCS3A02G056000	gid2	3A	32251515	32253338	IPR001005;IPR001810;IPR006447;IPR009057;IPR017884;IPR017930;IPR036047;IPR052245	SANT/Myb domain;F-box domain;Myb domain, plants;Homedomain-like superfamily;SANT domain;Myb domain;F-box-like domain superfamily;Plant Stress & Developmental Transcription Factors	Other/Unknown
TraesCS3A02G056100	NA	3A	32384710	32387330	IPR001005;IPR006447;IPR009057;IPR017884;IPR017930	SANT/Myb domain;Myb domain, plants;Homedomain-like superfamily;SANT domain;Myb domain	Other/Unknown
TraesCS3A02G056200	NA	3A	32412888	32413166	IPR000215;IPR023796;IPR036186	Serpin family;Serpin domain;Serpin superfamily	Other/Unknown
TraesCS3A02G056300	NA	3A	32414573	32417008	IPR000719;IPR008271;IPR011009;IPR017441	Protein kinase domain;Serine/threonine-protein kinase, active site;Protein kinase-like domain superfamily;Protein kinase, ATP binding site	Kinase
TraesCS3A02G056400	NA	3A	32425722	32428453	IPR000109;IPR018456;IPR036259	Proton-dependent oligopeptide transporter family;PTR2 family proton/oligopeptide symporter, conserved site;MFS transporter superfamily	Other/Unknown
TraesCS3A02G056500	NA	3A	32639616	32642710	IPR001806;IPR005225;IPR027417;IPR050227	Small GTPase;Small GTP-binding protein domain;P-loop containing nucleoside triphosphate hydrolase;Ras-related protein Rab	Other/Unknown
TraesCS3A02G056600	NA	3A	32646665	32650869	IPR001806;IPR005225;IPR027417;IPR050227	Small GTPase;Small GTP-binding protein domain;P-loop containing nucleoside triphosphate hydrolase;Ras-related protein Rab	Other/Unknown
TraesCS3A02G056700	NA	3A	32700757	32706314	IPR001806;IPR005225;IPR027417;IPR050227	Small GTPase;Small GTP-binding protein domain;P-loop containing nucleoside triphosphate hydrolase;Ras-related protein Rab	Other/Unknown
TraesCS3A02G056800	NA	3A	32716216	32718252	IPR001806;IPR005225;IPR027417;IPR050227	Small GTPase;Small GTP-binding protein domain;P-loop containing nucleoside triphosphate hydrolase;Ras-related protein Rab	Other/Unknown
TraesCS3A02G056900	NA	3A	32863884	32864815	IPR001806;IPR005225;IPR027417;IPR050227	Small GTPase;Small GTP-binding protein domain;P-loop containing nucleoside triphosphate hydrolase;Ras-related protein Rab	Other/Unknown
TraesCS3A02G057000	NA	3A	32874669	32876838	IPR000109;IPR018456;IPR036259	Proton-dependent oligopeptide transporter family;PTR2 family proton/oligopeptide symporter, conserved site;MFS transporter superfamily	Other/Unknown
TraesCS3A02G057100	NA	3A	32999694	33001275	IPR001087;IPR035669;IPR036514	GDSL lipase/esterase;GDSL lipase/esterase-like, plant;SGNH hydrolase superfamily	Other/Unknown
TraesCS3A02G057200	NA	3A	33139758	33142556	IPR036514	SGNH hydrolase superfamily	Other/Unknown
TraesCS3A02G057300	NA	3A	33200071	33203818	IPR011676	Domain of unknown function DUF1618	Other/Unknown
TraesCS3A02G057400	NA	3A	33423143	33427544	IPR011676	Domain of unknown function DUF1618	Other/Unknown
TraesCS3A02G057500	NA	3A	33429315	33431118	NA	NA	Other/Unknown
TraesCS3A02G057600	NA	3A	33568820	33578782	IPR011676	Domain of unknown function DUF1618	Other/Unknown
TraesCS3A02G057700	NA	3A	33582436	33585337	IPR011676	Domain of unknown function DUF1618	Other/Unknown
TraesCS3A02G057800	NA	3A	33884289	33886497	IPR011676	Domain of unknown function DUF1618	Other/Unknown
TraesCS3A02G057900	NA	3A	34050273	34051807	IPR011598;IPR036638;IPR051358;IPR054502	Myc-type, basic helix-loop-helix (bHLH) domain;Helix-loop-helix DNA-binding domain superfamily;Transcription factor AMS/ICE1/BHLH6-like;Plant bHLH transcription factor, ACT-like domain	Other/Unknown
TraesCS3A02G058000	NA	3A	34248315	34249499	IPR011598;IPR036638;IPR051358;IPR054502	Myc-type, basic helix-loop-helix (bHLH) domain;Helix-loop-helix DNA-binding domain superfamily;Transcription factor AMS/ICE1/BHLH6-like;Plant bHLH transcription factor, ACT-like domain	Other/Unknown
TraesCS3A02G058100	NA	3A	34519740	34524754	IPR002710;IPR037975;IPR052072;IPR000048;IPR027417	Dilute domain;Class XI myosin, cargo binding domain;Vascular development regulator domain-containing protein;IQ motif, EF-hand binding site;P-loop containing nucleoside triphosphate hydrolase	Other/Unknown
TraesCS3A02G058200	NA	3A	34531098	34534235	IPR002067;IPR018108;IPR023395	Mitochondrial carrier protein;Mitochondrial substrate/solute carrier;Mitochondrial carrier domain superfamily	Other/Unknown
TraesCS3A02G058300	NA	3A	34580172	34580309	IPR012552;IPR051525	DVL;DVL/RTFL regulatory polypeptides	Other/Unknown
TraesCS3A02G058400	NA	3A	34583131	34583271	IPR012552;IPR051525	DVL;DVL/RTFL regulatory polypeptides	Other/Unknown
TraesCS3A02G058500	NA	3A	34593139	34593276	IPR012552;IPR051525	DVL;DVL/RTFL regulatory polypeptides	Other/Unknown
TraesCS3A02G058600	NA	3A	34992463	34993341	NA	NA	Other/Unknown
TraesCS3A02G058700	NA	3A	35083570	35083857	IPR002156;IPR052929	Ribonuclease H domain;RNase H-like EbsB-related	Other/Unknown
TraesCS3A02G058900	NA	3A	35411623	35412216	IPR022149	Protein of unknown function DUF3681	Other/Unknown
TraesCS3A02G059000	NA	3A	35417888	35418358	NA	NA	Other/Unknown

## Sheet: Supplementary Table S8
Supplementary Table S8. Gene content of the qSTB-2D.1 interval based on the IWGSC RefSeq v.1.1 wheat genome annotation.
RefSeq v1.1 GeneID	Gene Name	Chromosome	Start Position	End Position	Interpro ID	Interpro Description	Gene Type
TraesCS2D02G579600	NA	2D	641979467	641982975	IPR000719;IPR002902;IPR008271;IPR011009;IPR017441;IPR038408;IPR050528	Protein kinase domain;Gnk2-homologous domain;Serine/threonine-protein kinase, active site;Protein kinase-like domain superfamily;Protein kinase, ATP binding site;Gnk2-homologous domain superfamily;L-type Lectin-Domain Containing Receptor Kinases	LecRLK
TraesCS2D02G578100	NA	2D	641103302	641110492	IPR001356;IPR039325;IPR056559;IPR056560	Homeodomain;Nodulin homeobox protein;Nodulin homeobox, C-terminal domain;Nodulin homeobox, homeobox-like domain	Other/Unknown
TraesCS2D02G578300	NA	2D	641183434	641184859	IPR000246;IPR029055	Peptidase T2, asparaginase 2;Nucleophile aminohydrolases, N-terminal	Other/Unknown
TraesCS2D02G578400	NA	2D	641204844	641205107	NA	NA	Other/Unknown
TraesCS2D02G578500	NA	2D	641230735	641235850	IPR040276	Uncharacterized protein At4g26450-like	Other/Unknown
TraesCS2D02G578600	NA	2D	641304831	641311511	IPR011990;IPR019734;IPR047150	Tetratricopeptide-like helical domain superfamily;Tetratricopeptide repeat;SGT	Other/Unknown
TraesCS2D02G578700	NA	2D	641484135	641486913	NA	NA	Other/Unknown
TraesCS2D02G578800	NA	2D	641577764	641579226	NA	NA	Other/Unknown
TraesCS2D02G578900	NA	2D	641599690	641606211	IPR004457;IPR040141;IPR042451;IPR042452;IPR056180	Zinc finger, ZPR1-type;ZPR1 family;ZPR1, A/B domain;ZPR1, zinc finger domain;ZPR1, jelly-roll domain	Other/Unknown
TraesCS2D02G579000	NA	2D	641607184	641608551	IPR005123;IPR027450;IPR037151;IPR044842	Oxoglutarate/iron-dependent dioxygenase domain;Alpha-ketoglutarate-dependent dioxygenase AlkB-like;Alpha-ketoglutarate-dependent dioxygenase AlkB-like superfamily;RNA demethylase ALKBH9B/ALKBH10B-like	Other/Unknown
TraesCS2D02G579100	NA	2D	641610503	641614255	IPR046533	Domain of unknown function DUF6598	Other/Unknown
TraesCS2D02G579200	NA	2D	641895872	641896564	NA	NA	Other/Unknown
TraesCS2D02G579300	NA	2D	641948128	641951116	IPR046533;	Domain of unknown function DUF6598;	Other/Unknown
TraesCS2D02G579400	NA	2D	641957329	641959009	IPR037151;IPR044842	Alpha-ketoglutarate-dependent dioxygenase AlkB-like superfamily;RNA demethylase ALKBH9B/ALKBH10B-like	Other/Unknown
TraesCS2D02G579500	NA	2D	641960701	641963851	IPR004045;IPR004046;IPR010987;IPR034347;IPR036249;IPR036282;IPR040079	Glutathione S-transferase, N-terminal;Glutathione S-transferase, C-terminal;Glutathione S-transferase, C-terminal-like;Glutathione S-transferases Phi, C-terminal;Thioredoxin-like superfamily;Glutathione S-transferase, C-terminal domain superfamily;Glutathione transferase family	Other/Unknown
TraesCS2D02G579700	NA	2D	642016906	642018131	IPR024752	Myb/SANT-like domain	Other/Unknown
TraesCS2D02G579900	NA	2D	642100272	642101692	IPR036537;IPR054000	Adaptor protein Cbl, N-terminal domain superfamily;Mixed lineage kinase domain-like, N-terminal domain	Other/Unknown
TraesCS2D02G580100	NA	2D	642209221	642211507	IPR025315	Domain of unknown function DUF4220	Other/Unknown
TraesCS2D02G580200	NA	2D	642238640	642240736	IPR046533	Domain of unknown function DUF6598	Other/Unknown
TraesCS2D02G580300	NA	2D	642251282	642254701	IPR046533	Domain of unknown function DUF6598	Other/Unknown
TraesCS2D02G580400	NA	2D	642332360	642335092	IPR013087	Zinc finger C2H2-type	Other/Unknown
TraesCS2D02G580500	NA	2D	642339657	642347699	IPR025315	Domain of unknown function DUF4220	Other/Unknown
TraesCS2D02G580600	NA	2D	642476934	642479009	IPR046533	Domain of unknown function DUF6598	Other/Unknown
TraesCS2D02G580700	NA	2D	642781595	642783897	IPR000626;IPR001975;IPR011332;IPR019954;IPR019956;IPR029071;IPR038587;IPR050158	Ubiquitin-like domain;Large ribosomal subunit protein eL40 domain;Zinc-binding ribosomal protein;Ubiquitin conserved site;Ubiquitin domain;Ubiquitin-like domain superfamily;Large ribosomal subunit protein eL40 superfamily;Ubiquitin and ubiquitin-like	Other/Unknown
TraesCS2D02G580800	NA	2D	642828484	642830523	NA	NA	Other/Unknown
TraesCS2D02G580900	NA	2D	642870817	642873283	IPR046533	Domain of unknown function DUF6598	Other/Unknown
TraesCS2D02G581000	NA	2D	642938785	642939141	IPR000440;IPR038430	NADH:ubiquinone/plastoquinone oxidoreductase, chain 3;NADH:ubiquinone oxidoreductase, subunit 3 superfamily	Other/Unknown
TraesCS2D02G581100	NA	2D	642939186	642939563	IPR005679;IPR006032;IPR012340	Ribosomal protein S12, bacterial-type;Ribosomal protein S12/S23;Nucleic acid-binding, OB-fold	Other/Unknown
TraesCS2D02G581200	NA	2D	642965524	642967324	IPR000873;IPR020845;IPR025110;IPR042099;IPR045851	AMP-dependent synthetase/ligase domain;AMP-binding, conserved site;AMP-binding enzyme, C-terminal domain;ANL, N-terminal domain;AMP-binding enzyme, C-terminal domain superfamily	Other/Unknown
TraesCS2D02G581300	NA	2D	642988370	642990684	IPR000504;IPR012677;IPR035979;IPR053316	RNA recognition motif domain;Nucleotide-binding alpha-beta plait domain superfamily;RNA-binding domain superfamily;Epigenetic regulator of gene expression	Other/Unknown
TraesCS2D02G581400	NA	2D	642990819	642992953	IPR001938;IPR037176	Thaumatin family;Osmotin/thaumatin-like superfamily	Other/Unknown
TraesCS2D02G581500	NA	2D	643005257	643006758	IPR023213;IPR050317	Chloramphenicol acetyltransferase-like domain superfamily;Plant and Fungal Acyltransferase	Other/Unknown
TraesCS2D02G581600	NA	2D	643048869	643049960	IPR025315	Domain of unknown function DUF4220	Other/Unknown
TraesCS2D02G581700	F3	2D	643050668	643052225	IPR001128;IPR002401;IPR017972;IPR036396	Cytochrome P450;Cytochrome P450, E-class, group I;Cytochrome P450, conserved site;Cytochrome P450 superfamily	Other/Unknown
TraesCS2D02G581800	NA	2D	643052628	643053203	NA	NA	Other/Unknown
TraesCS2D02G581900	NA	2D	643069483	643071129	IPR000873;IPR020845;IPR025110;IPR042099;IPR045851	AMP-dependent synthetase/ligase domain;AMP-binding, conserved site;AMP-binding enzyme, C-terminal domain;ANL, N-terminal domain;AMP-binding enzyme, C-terminal domain superfamily	Other/Unknown
TraesCS2D02G582000	NA	2D	643122318	643124040	IPR023213;IPR050317	Chloramphenicol acetyltransferase-like domain superfamily;Plant and Fungal Acyltransferase	Other/Unknown
TraesCS2D02G582100	NA	2D	643171174	643174229	IPR007658;IPR025315	Protein of unknown function DUF594;Domain of unknown function DUF4220	Other/Unknown
TraesCS2D02G582200	NA	2D	643192083	643193944	IPR055301	Late embryogenesis abundant protein Lea14-like_2	Other/Unknown
TraesCS2D02G579800	NA	2D	642034283	642037748	IPR000719;IPR001245;IPR008271;IPR011009;IPR017441	Protein kinase domain;Serine-threonine/tyrosine-protein kinase, catalytic domain;Serine/threonine-protein kinase, active site;Protein kinase-like domain superfamily;Protein kinase, ATP binding site	Kinase
TraesCS2D02G580000	NA	2D	642197592	642202812	IPR000719;IPR008271;IPR011009;IPR014020;IPR017441;IPR029021;IPR035892;IPR051144	Protein kinase domain;Serine/threonine-protein kinase, active site;Protein kinase-like domain superfamily;Tensin phosphatase, C2 domain;Protein kinase, ATP binding site;Protein-tyrosine phosphatase-like;C2 domain superfamily;Formin homology domain-containing protein	Kinase

## Sheet: Supplementary Table S9
Supplementary Table S9. Gene content of the qSTB-1B.2 interval based on the IWGSC RefSeq v.1.1 wheat genome annotation.
RefSeq v1.1 GeneID	Gene Name	Chromosome	Start Position	End Position	Interpro ID	Interpro Description	Gene Type
TraesCS1B02G423500	NA	1B	646167330	646172839	IPR008598;IPR027935;IPR033347	Drought induced 19 protein type, zinc-binding domain;Protein dehydration-induced 19, C-terminal;Protein DEHYDRATION-INDUCED 19	Other/Unknown
TraesCS1B02G423600	NA	1B	646189287	646191990	IPR001623;IPR002939;IPR008971;IPR018253;IPR036869;IPR051339	DnaJ domain;Chaperone DnaJ, C-terminal;HSP40/DnaJ peptide-binding;DnaJ domain, conserved site;Chaperone J-domain superfamily;DnaJ homolog subfamily B	Other/Unknown
TraesCS1B02G423700	NA	1B	646462178	646462564	NA	NA	Other/Unknown
TraesCS1B02G423800	NA	1B	646682762	646687533	IPR005172	CRC domain	Other/Unknown
TraesCS1B02G423900	NA	1B	646775147	646776631	IPR005172;IPR028307;IPR033467	CRC domain;Lin-54 family;Tesmin/TSO1-like CXC domain	Other/Unknown
TraesCS1B02G424000	NA	1B	647142359	647144429	IPR002885;IPR011990;IPR046848;IPR046960	Pentatricopeptide repeat;Tetratricopeptide-like helical domain superfamily;E motif;Pentatricopeptide repeat-containing protein At4g14850-like, plant	Other/Unknown
TraesCS1B02G424100	NA	1B	647227620	647240151	IPR001356;IPR007759;IPR009057;IPR018501;IPR028941;IPR028942;IPR044977	Homeodomain;ASXL, HARE-HTH domain;Homedomain-like superfamily;DDT domain;WHIM2 domain;WHIM1 domain;Homeobox-DDT domain protein RLT1-3	Other/Unknown
TraesCS1B02G424200	NA	1B	647445295	647446562	IPR002562;IPR012337;IPR036397;IPR051132	3'-5' exonuclease domain;Ribonuclease H-like superfamily;Ribonuclease H superfamily;3'-5' Exonuclease domain-containing protein	Other/Unknown
TraesCS1B02G424300	NA	1B	648031693	648034419	IPR007770	Protein DMP	Other/Unknown
TraesCS1B02G424400	NA	1B	648444810	648454449	IPR003191;IPR015894;IPR027417;IPR030386;IPR036543;IPR001849	Guanylate-binding protein/Atlastin, C-terminal;Guanylate-binding protein, N-terminal;P-loop containing nucleoside triphosphate hydrolase;GB1/RHD3-type guanine nucleotide-binding (G) domain;Guanylate-binding protein, C-terminal domain superfamily;Pleckstrin homology domain	Other/Unknown
TraesCS1B02G424500	NA	1B	648592940	648594380	IPR000757;IPR008263;IPR008264;IPR010713;IPR013320;IPR016455;IPR044791	Glycoside hydrolase family 16;Glycoside hydrolase, family 16, active site;Beta-glucanase;Xyloglucan endo-transglycosylase, C-terminal;Concanavalin A-like lectin/glucanase domain superfamily;Xyloglucan endotransglucosylase/hydrolase;Beta-glucanase/XTH	Other/Unknown
TraesCS1B02G424600	NA	1B	648814768	648815316	NA	NA	Other/Unknown
TraesCS1B02G424700	NA	1B	649049858	649055625	IPR003340;IPR010525;IPR015300;IPR044835	B3 DNA binding domain;Auxin response factor domain;DNA-binding pseudobarrel domain superfamily;Auxin response factor	Other/Unknown
TraesCS1B02G424800	NA	1B	649329528	649332402	IPR004181;IPR013083;IPR026846	Zinc finger, MIZ-type;Zinc finger, RING/FYVE/PHD-type;E3 SUMO-protein ligase Nse2 (Mms21)	Other/Unknown
TraesCS1B02G424900	NA	1B	649368588	649369391	IPR000782;IPR006311;IPR036378;IPR045003	FAS1 domain;Twin-arginine translocation pathway, signal sequence;FAS1 domain superfamily;Fasciclin-like arabinogalactan protein, group A	Other/Unknown
TraesCS1B02G425000	NA	1B	649426168	649427614	IPR000782;IPR036378;IPR045003	FAS1 domain;FAS1 domain superfamily;Fasciclin-like arabinogalactan protein, group A	Other/Unknown
TraesCS1B02G425100	NA	1B	649429498	649430685	IPR010666	Zinc finger, GRF-type	Other/Unknown
TraesCS1B02G425200	NA	1B	649670064	649671011	IPR002109;IPR011905;IPR036249	Glutaredoxin;Glutaredoxin-like, plant II;Thioredoxin-like superfamily	Other/Unknown
TraesCS1B02G425300	NA	1B	651274238	651278958	IPR053342	Exosome cofactor and PTGS suppressor	Other/Unknown
